# Supplementary material for: Organocatalytic enantioselective tandem sulfa-Michael/aldol reaction to access dihydrothiopyran-fused benzosulfolane skeletons bearing three contiguous stereocenters
Source: Royal Society of Chemistry journal article supplement (doi:10.1039/d0cc04840b), 2020-01-01
Supplement: d0cc04840b1.pdf [file d0cc04840b1.pdf]

# Organocatalytic enantioselective tandem sulfa-Michael/aldol reaction to access dihydrothiopyran-fused benzosulfolane skeletons bearing three contiguous stereocenters

Lei Yang,<sup>a,c</sup> Jian-Qiang Zhao,<sup>b</sup> Yong You,<sup>b</sup> Zhen-Hua Wang,<sup>b</sup> and Wei-Cheng Yuan<sup>b\*</sup>

<sup>a</sup>National Engineering Research Center of Chiral Drugs, Chengdu Institute of Organic Chemistry, Chinese Academy of Sciences, Chengdu, 610041, China

<sup>b</sup>Institute for Advanced Study, Chengdu University, Chengdu, 610106, China

<sup>c</sup>University of Chinese Academy of Sciences, Beijing, 100049, China

E-mail: yuanwc@cioc.ac.cn

## Supporting Information

### Table of Contents

|                                                                                                                       |    |
|-----------------------------------------------------------------------------------------------------------------------|----|
| 1. General information.....                                                                                           | 1  |
| 2. Catalyst synthesis.....                                                                                            | 1  |
| 3. General procedure for the preparation of substrates <b>1</b> .....                                                 | 2  |
| 4. General procedure for the preparation of substrates <b>2</b> .....                                                 | 3  |
| 5. General procedure for the asymmetric reaction of compounds <b>3</b> .....                                          | 3  |
| 6. General experimental procedure for asymmetric synthesis of compounds <b>5</b> .....                                | 9  |
| 7. Scale-up experiment.....                                                                                           | 11 |
| 8. General experimental procedures for in vitro cytotoxicity assay.....                                               | 11 |
| 9. X-ray crystal structure of <b>3a</b> and <b>5a</b> .....                                                           | 12 |
| 10. Proposed transition state for the enantioselective tandem reaction.....                                           | 13 |
| 11. <sup>1</sup> H, <sup>13</sup> C NMR, spectra for catalysts <b>C</b> and <b>D</b> .....                            | 14 |
| 12. <sup>1</sup> H, <sup>13</sup> C NMR, and HPLC spectra for compounds <b>3a-y</b> , and compounds <b>5a-g</b> ..... | 16 |

## 1. General Information

Reagents were purchased from commercial sources and were used as received unless mentioned otherwise. Reactions were monitored by TLC.  $^1\text{H}$  NMR and  $^{13}\text{C}$  NMR spectra were recorded in  $\text{CDCl}_3$  and  $\text{DMSO-}d_6$ .  $^1\text{H}$  NMR chemical shifts are reported in ppm relative to tetramethylsilane (TMS) with the solvent resonance employed as the internal standard ( $\text{CDCl}_3$  at 7.26 ppm,  $\text{DMSO-}d_6$  at 2.50 ppm). Data are reported as follows: chemical shift, multiplicity (s = singlet, br s = broad singlet, d = doublet, t = triplet, q = quartet, m = multiplet), coupling constants (Hz) and integration.  $^{13}\text{C}$  NMR chemical shifts are reported in ppm from tetramethylsilane (TMS) with the solvent resonance as the internal standard ( $\text{CDCl}_3$  at 77.20 ppm,  $\text{DMSO-}d_6$  at 39.51 ppm). Melting points were recorded on a melting point apparatus.

## 2. Catalyst synthesis.<sup>[1]</sup>

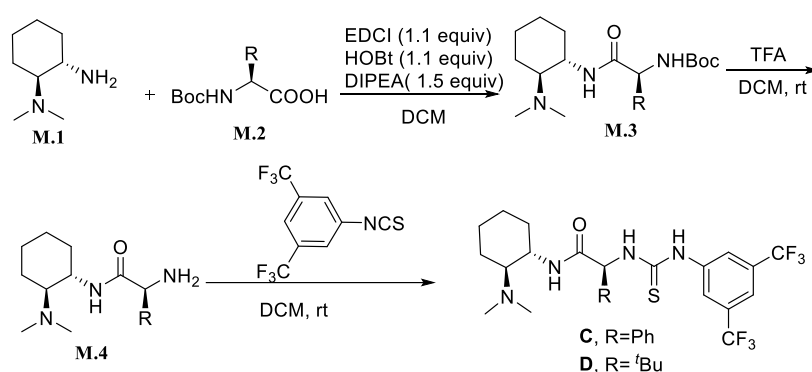

To a round bottomed flask equipped with a magnetic stirring bar was added EDCI (27.84 mmol, 1.1 equiv), HOBT (27.84 mmol, 1.1 equiv.),  $\text{CH}_2\text{Cl}_2$  (DCM) (50 mL) and DIPEA (34.8 mmol, 1.1 equiv.) via syringe. After short stirring, and then compound **M.1** was added to the mixture, followed by slow addition of compound **M.2**. The mixture was stirred at room temperature until the reaction was complete monitored by TLC. Then 30 mL water was added to the mixture and the aqueous phase extracted with DCM (50 mL x 3). The combined organic phases were washed with brine, dried by  $\text{Na}_2\text{SO}_4$ , and concentrated under reduced pressure. The residue purified by flash chromatography to afford the desired product **M.3** (5.94 g, 72% yield).

Compound **M.3** (15 mmol, 1.0 equiv) was dissolved in DCM (20 mL), cooled to 0 °C and trifluoroacetic acid (150.0 mmol, 10.0 eq.) in DCM (10) was added dropwise. After 10 mins, the reaction temperature was allowed to warm up to room temperature and stirred overnight. The mixture was cooled to 0 °C, then 1M NaOH was added to it until the pH to 12. Then the resulting mixture was extracted with DCM (50 mL x 3), the combined organic phase washed with brine and dried by  $\text{Na}_2\text{SO}_4$ , filtered, concentrated under reduced pressure to afford the crude product **M.4**.

The crude product **M.4** was dissolved in DCM (20.0 mL) at room temperature and the 3,5-bis(trifluoromethyl)phenyl isothiocyanate (2.4 mmol, 1.1 equiv.) was added dropwise via funnel at 0 °C. After 10 mins, the reaction temperature was allowed to warm up to room temperature, and the mixture was stirred at room temperature. After 30 min, the solvent was removed and the residue purified by flash chromatography to afford catalysts **C**, **D** as a white solid.

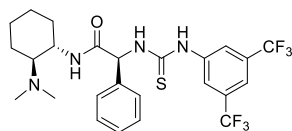

**(S)-2-(3-(3,5-bis(trifluoromethyl)phenyl)thioureido)-N-((1S,2S)-2-(dimethylamino)cyclohexyl)-2-phenylacetamide (C)**: white solid; yield 97%;  $[\alpha]_D^{20} = +41.9$  (*c* 1.0, CH<sub>2</sub>Cl<sub>2</sub>); m.p.216.4-217.3 °C; <sup>1</sup>H NMR (300 MHz, CDCl<sub>3</sub>) δ 9.42 (s, 1H), 8.70 (s, 1H), 8.05 (s, 2H), 7.51 (s, 1H), 7.29 (q, *J* = 4.8, 3.3 Hz, 5H), 6.76 (s, 1H), 6.20 (s, 1H), 3.36 (s, 1H), 2.35 (d, *J* = 12.9 Hz, 1H), 2.22 (s, 1H), 1.96 (s, 6H), 1.76 (t, *J* = 10.2 Hz, 2H), 1.58 (d, *J* = 11.7 Hz, 1H), 1.37-0.94 (m, 4H). <sup>13</sup>C NMR (75 MHz, CDCl<sub>3</sub>) δ 181.4, 172.4, 140.7, 136.5, δ 131.50 (q, *J* = 33.4 Hz), 129.1, 128.7, 128.6, 127.7, 125.1, 123.3, 121.5, 117.8, 66.5, 62.1, 52.3, 39.6, 32.5, 25.1, 24.5, 21.4. HRMS (ESI) Calcd. for C<sub>25</sub>H<sub>29</sub>F<sub>6</sub>N<sub>4</sub>O<sub>2</sub>S, [M+H]<sup>+</sup> 547.1961; found: 547.1980.

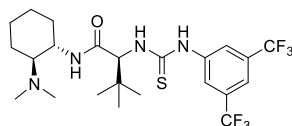

**(S)-2-(3-(3,5-bis(trifluoromethyl)phenyl)thioureido)-N-((1S,2S)-2-(dimethylamino)cyclohexyl)-3,3-dimethylbutanamide (D)**: white solid; yield 95%;  $[\alpha]_D^{20} = -5.8$  (*c* 1.0, CH<sub>2</sub>Cl<sub>2</sub>); m.p.212.3-213.5 °C; <sup>1</sup>H NMR (300 MHz, CDCl<sub>3</sub>) δ 9.05 (s, 1H), 8.17 (s, 1H), 7.94 (s, 2H), 7.55 (s, 1H), 6.46 (d, *J* = 5.1 Hz, 1H), 5.04 (s, 1H), 3.51 (d, *J* = 4.9 Hz, 1H), 2.20 (s, 8H), 1.84 (d, *J* = 9.4 Hz, 1H), 1.75 (d, *J* = 8.1 Hz, 1H), 1.51 (d, *J* = 10.6 Hz, 1H), 1.12 (s, 13H). <sup>13</sup>C NMR (75 MHz, CDCl<sub>3</sub>) δ 182.0, 172.3, 140.5, δ 131.6 (q, *J* = 33.5 Hz), 128.7, 125.1, 124.2, 124.2, 121.5, 118.3, 117.8, 66.8, 66.7, 52.0, 40.1, 35.3, 32.6, 27.4, 25.1, 24.6, 21.2. HRMS (ESI) Calcd. for C<sub>23</sub>H<sub>33</sub>F<sub>6</sub>N<sub>4</sub>O<sub>2</sub>S [M+H]<sup>+</sup> 527.2274, found: 527.2286.

### 3. General procedure for the preparation of substrates **1**. [2,3]

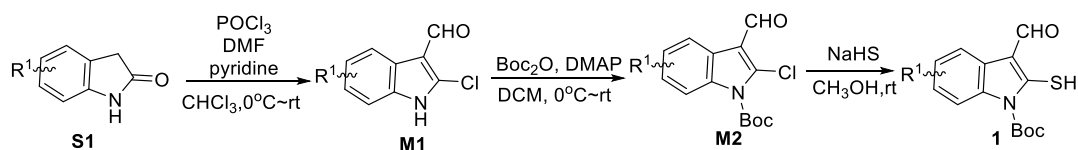

To a mixture of DMF (5 equiv., 20 mL) and CHCl<sub>3</sub> (10 mL) was added POCl<sub>3</sub> (2.5 equiv., 20 mL) via a funnel drop by drop over 20 mins at 0 °C. After 30 mins, a mixture of oxindole **S1** (R<sup>1</sup> = H) (6.4 g 48 mmol), pyridine (0.2 equiv, 10 mL) and CHCl<sub>3</sub> (50 mL) was added via a funnel at 0 °C. The mixture was stirred overnight at room temperature. The mixture was poured in to ice-cold H<sub>2</sub>O and the solid compounds was filtered and dried. The crude product **M1** was obtained (6.9 g, 80% yield).

The crude product **M1** (R<sup>1</sup> = H) (5 g 27.84 mmol) was dissolved in 50 mL DCM, and the Boc<sub>2</sub>O (29.23 mmol, 1.05 equiv.) was added dropwise via funnel at 0 °C and the reaction temperature was allowed to warm up to room temperature, and the mixture was stirred at room temperature until the reaction was complete monitored by TLC. The mixture was concentrated under reduced pressure. The residue purified by flash chromatography to afford the desired product **M2** (9.5 g 82% yield).

The above product **M2** (R<sup>1</sup> = H) (4g, 14.28 mmol) was dissolved in methanol (20 mL), the sodium hydrogensulfide hydrate (1.77 g, 1.5 equiv.) was added. After stirring for 3 h at room temperature the reaction mixture was poured into water. Then 1 M HCl was added to it until the pH to 1~2. Then the resulting mixture was extracted with DCM (30 mL x 3), the combined organic phase washed with brine and dried by Na<sub>2</sub>SO<sub>4</sub>, filtered, concentrated under reduced pressure to afford the crude product and the crude product recrystallization from ethyl acetate and petroleum ether. The yellow needles solid **1** was obtained.

#### 4. General procedure for the preparation of substrates **2**.<sup>[4]</sup>

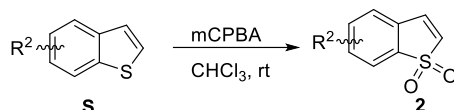

*m*-Chloroperbenzoic acid (70%, 14.4 g, 62.5 mmol, 2.5 equiv.) was added portion-wise to a solution of benzo[*b*]thiophene ( $R^2 = H$ ) (3.36 g, 25 mmol) in chloroform (100 mL) at room temperature with vigorous stirring. The mixture was allowed to stir overnight at the same temperature. Then, a saturated aqueous  $\text{NaHCO}_3$  solution was added and the aqueous layer was extracted with dichloromethane (50 mL  $\times$  3). The collected organic layers were dried, and the solvent was removed in vacuo. Crystallization **2** ( $R = H$ ) from ethanol afforded white crystals (3g, 72% yield).

#### References

- [1] X. Yang, Y.-H. Zhou, H. Yang, S.-S. Wang, Q. Ouyang, Q.-L. Luo and Q.-X. Guo, *Org. Lett.*, **2019**, *21*, 1161.
- [2] H.-B. Deng and J. P. Konopelski, *Org. Lett.*, **2001**, *19*, 3001.
- [3] L.-L. Wu, Y.-M. Wang and Z.-H. Zhou, *Tetrahedron: Asymmetry*, **2014**, *25*, 1389.
- [4] D. Madec, F. Mingoia and G. Poli, *Eur. J. Org. Chem.* **2005**, 552.

#### 5. General procedure for the asymmetric reaction of compounds **3**.

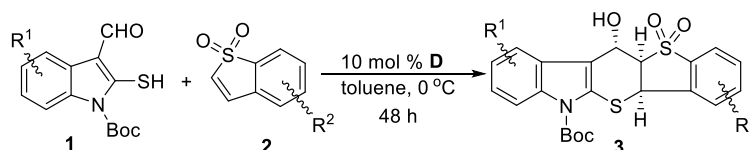

To a reaction tube were added the 2-mercaptoindole-3-carbaldehydes **1** (0.11 mmol, 1.1 equiv.), benzo[*b*]thiophene 1,1-dioxide **1** (0.1 mmol, 1.0 equiv.), catalyst **D** (0.01 mmol) and toluene (0.5 mL). The reaction mixture was stirred at 0 °C for 48 h. the reaction mixture was directly purified by flash chromatography on silica gel (petroleum ether/ethyl acetate = 4:1 ~ 3:1) to afford the desired product **3**.

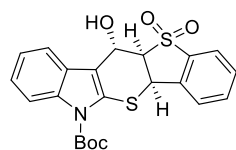

**tert-butyl(6aR,11aR,12S)-12-hydroxy-11a,12-dihydrobenzo[4',5']thieno[2',3':5,6]thiopyrano[2,3-b]indole-5(6aH)-carboxylate 11,11-dioxide (3a)**: white solid; 99% yield; 98% ee; >20:1 dr,  $[\alpha]_D^{20} = +75.2$  (c 1.0,  $\text{CH}_2\text{Cl}_2$ ); m.p.183.4-185.1 °C; The ee was determined

by HPLC analysis using a Chiralpak OD-H column (70/30 hexane/*i*-PrOH; flow rate: 1.0 mL/min;  $\lambda = 254$  nm;  $t_{\text{major}} = 11.98$  min,  $t_{\text{minor}} = 7.72$  min);  $^1\text{H NMR}$  (400 MHz,  $\text{DMSO}-d_6$ )  $\delta$  8.00-7.92 (m, 1H), 7.89 (d,  $J = 7.6$  Hz, 1H), 7.77 (t,  $J = 4.5$  Hz, 3H), 7.67 (m,  $J = 8.2$ , 1H), 7.32-7.23 (m, 2H), 6.41 (d,  $J = 7.1$  Hz, 1H), 5.42 (dd,  $J = 7.2$ , 3.0 Hz, 1H), 5.34 (d,  $J = 6.6$  Hz, 1H), 4.41 (dd,  $J = 6.6$ , 3.0 Hz, 1H), 1.62 (s, 9H).  $^{13}\text{C NMR}$  (100 MHz,  $\text{DMSO}-d_6$ )  $\delta$  149.6, 137.6, 137.4, 135.0, 134.4, 130.7, 128.9, 128.2, 127.0, 123.7, 123.2, 122.2, 118.6, 114.6, 85.7, 79.2, 67.3, 58.3, 27.7. HRMS (ESI) Calcd. for  $\text{C}_{22}\text{H}_{21}\text{NNaO}_5\text{S}_2$   $[\text{M} + \text{H}]^+$  466.0753; found: 466.0768.

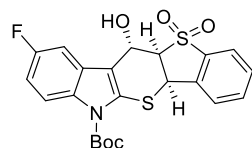

**tert-butyl(6aR,11aR,12S)-2-fluoro-12-hydroxy-11a,12-dihydrobenzo[4',5']thieno[2',3':5,6]thiopyrano[2,3-b]indole-5(6aH)-carboxylate 11,11-dioxide (3b)**: white solid; 99% yield; 97% ee; 10:1 dr,  $[\alpha]_D^{20} = +51.4$  (c 1.0,  $\text{CH}_2\text{Cl}_2$ ); m.p.313.2-314.4 °C; The ee was

determined by HPLC analysis using a Chiralpak OD-H column (50/50 hexane/*i*-PrOH; flow rate: 1.0 mL/min;  $\lambda = 254$  nm;  $t_{\text{major}} = 9.98$  min,  $t_{\text{minor}} = 5.67$  min)  $^1\text{H}$  NMR (300 MHz, DMSO- $d_6$ )  $\delta$  7.98-7.87 (m, 2H), 7.84-7.75 (m, 2H), 7.68 (m, 1H), 7.53 (dd,  $J = 9.2, 2.7$  Hz, 1H), 7.11 (td,  $J = 9.2, 2.7$  Hz, 1H), 6.40 (d,  $J = 7.1$  Hz, 1H), 5.44-5.32 (m, 2H), 4.42 (dd,  $J = 6.6, 3.1$  Hz, 1H), 1.62 (s, 9H).  $^{13}\text{C}$  NMR (75 MHz, DMSO- $d_6$ )  $\delta$ , 158.7 (d,  $J = 237.5$  Hz) 149.2, 137.5, 137.2, 134.4, 131.4, 130.6, 130.2, 129.9 (d,  $J = 10.4$  Hz), 126.9, 122.2, 115.8 (d,  $J = 9.3$  Hz), 114.3 (d,  $J = 3.7$  Hz), 110.9 (d,  $J = 25.0$  Hz), 104.2 (d,  $J = 24.6$  Hz), 85.9, 66.9, 58.0, 54.9, 27.6; HRMS (ESI) Calcd. for  $\text{C}_{22}\text{H}_{20}\text{FNNaO}_5\text{S}_2$   $[\text{M}+\text{Na}]^+$ : 484.0659; found: 484.0647.

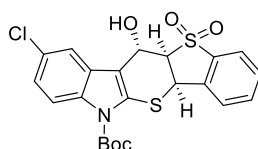

***tert*-butyl(6aR,11aR,12S)-2-chloro-12-hydroxy-11a,12-dihydrobenzo[4',5']thieno[2',3':5,6]thiopyrano[2,3-*b*]indole-5(6aH)-carboxylate 11,11-dioxide (3c):** white solid; 98% yield; 95% ee; 7:1 dr,  $[\alpha]_{\text{D}}^{20} = +95.2$  ( $c$  1.0,  $\text{CH}_2\text{Cl}_2$ ); m.p.159.6-160.3  $^\circ\text{C}$ ; The ee was

determined by HPLC analysis using a Chiralpak OD-H column (50/50 hexane/*i*-PrOH; flow rate: 1.0 mL/min;  $\lambda = 254$  nm;  $t_{\text{major}} = 10.84$  min,  $t_{\text{minor}} = 5.68$  min)  $^1\text{H}$  NMR (300 MHz, DMSO- $d_6$ )  $\delta$  7.92 (t,  $J = 7.6$  Hz, 2H), 7.84-7.75 (m, 3H), 7.68 (m, 1H), 7.30 (dd,  $J = 8.8, 2.2$  Hz, 1H), 6.43 (d,  $J = 7.0$  Hz, 1H), 5.41 (dd,  $J = 7.0, 3.1$  Hz, 1H), 5.35 (d,  $J = 6.7$  Hz, 1H), 4.43 (dd,  $J = 6.6, 3.1$  Hz, 1H), 1.62 (s, 9H).  $^{13}\text{C}$  NMR (75 MHz, DMSO- $d_6$ )  $\delta$  149.1, 137.5, 137.1, 134.3, 133.4, 130.6, 130.1, 128.0, 127.7, 126.9, 123.3, 122.1, 117.9, 115.9, 114.0, 86.1, 79.2, 67.0, 58.1, 27.6; HRMS (ESI) Calcd. for  $\text{C}_{22}\text{H}_{20}\text{ClNNaO}_5\text{S}_2$   $[\text{M}+\text{Na}]^+$ : 500.0364; found: 500.0346.

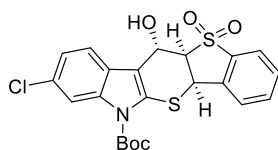

***tert*-butyl(6aR,11aR,12S)-3-chloro-12-hydroxy-11a,12-dihydrobenzo[4',5']thieno[2',3':5,6]thiopyrano[2,3-*b*]indole-5(6aH)-carboxylate 11,11-dioxide (3d):** white solid; 96% yield; 97% ee; >20:1 dr,  $[\alpha]_{\text{D}}^{20} = +88.4$  ( $c$  1.0,  $\text{CH}_2\text{Cl}_2$ ); m.p.292.3-293.5  $^\circ\text{C}$ ; The

ee was determined by HPLC analysis using a Chiralpak OD-H column (50/50 hexane/*i*-PrOH; flow rate: 1.0 mL/min;  $\lambda = 254$  nm;  $t_{\text{major}} = 10.45$  min,  $t_{\text{minor}} = 7.08$  min);  $^1\text{H}$  NMR (300 MHz, DMSO- $d_6$ )  $\delta$  7.97 (d,  $J = 1.9$  Hz, 1H), 7.91 (d,  $J = 7.6$  Hz, 1H), 7.84-7.74 (m, 3H), 7.68 (m, 1H), 7.34 (dd,  $J = 8.4, 2.0$  Hz, 1H), 6.45 (d,  $J = 7.2$  Hz, 1H), 5.40 (dd,  $J = 7.2, 3.2$  Hz, 1H), 5.35 (d,  $J = 6.7$  Hz, 1H), 4.42 (dd,  $J = 6.7, 3.2$  Hz, 1H), 1.62 (s, 9H).  $^{13}\text{C}$  NMR (75 MHz, DMSO- $d_6$ )  $\delta$  149.0, 137.6, 137.0, 135.3, 134.4, 130.7, 129.1, 128.1, 127.6, 127.0, 123.4, 122.2, 119.8, 114.7, 114.4, 86.3, 67.2, 58.4, 54.9, 27.6; HRMS (ESI) Calcd. for  $\text{C}_{22}\text{H}_{20}\text{ClNNaO}_5\text{S}_2$   $[\text{M}+\text{Na}]^+$ : 500.0364; found: 500.0349.

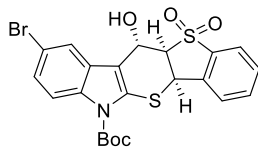

***tert*-butyl(6aR,11aR,12S)-2-bromo-12-hydroxy-11a,12-dihydrobenzo[4',5']thieno[2',3':5,6]thiopyrano[2,3-*b*]indole-5(6aH)-carboxylate 11,11-dioxide (3e):** white solid; 95% yield; 93% ee; >20:1 dr,  $[\alpha]_{\text{D}}^{20} = +90.4$  ( $c$  1.0,  $\text{CH}_2\text{Cl}_2$ ); m.p.186.1-187.3  $^\circ\text{C}$ ; The ee was

determined by HPLC analysis using a Chiralpak OD-H column (50/50 hexane/*i*-PrOH; flow rate: 1.0 mL/min;  $\lambda = 254$  nm;  $t_{\text{major}} = 8.62$  min,  $t_{\text{minor}} = 5.32$  min)  $^1\text{H}$  NMR (300 MHz,  $\text{CDCl}_3$ )  $\delta$  7.91 (d,  $J = 2.0$  Hz, 1H), 7.82 (d,  $J = 8.3$  Hz, 2H), 7.67 (dt,  $J = 14.6, 7.6$  Hz, 2H), 7.55 (t,  $J = 7.3$  Hz, 1H), 7.32-7.26 (m, 1H), 5.22 (dd,  $J = 7.1, 4.4$  Hz, 1H), 5.13 (d,  $J = 5.8$  Hz, 1H), 3.90 (t,  $J = 6.4$  Hz, 1H), 3.64 (d,  $J = 4.5$  Hz, 1H), 1.72 (s, 9H).  $^{13}\text{C}$  NMR (75 MHz,  $\text{CDCl}_3$ )  $\delta$  150.0, 138.6, 136.8, 134.4, 130.4, 130.3, 128.7, 126.5, 126.2, 122.8, 122.3, 116.9, 116.2, 112.0, 86.6, 67.3, 62.6, 40.4, 28.4; HRMS (ESI) Calcd. for  $\text{C}_{22}\text{H}_{20}\text{BrNNaO}_5\text{S}_2$   $[\text{M}+\text{Na}]^+$ : 543.9858; found: 543.9839.

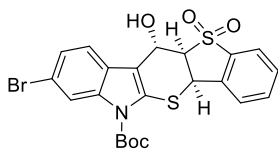

**tert-butyl(6aR,11aR,12S)-3-bromo-12-hydroxy-11a,12-dihydrobenzo[4',5']thieno[2',3':5,6]thiopyrano[2,3-b]indole-5(6aH)-carboxylate 11,11-dioxide (3f):** white solid; 95% yield; 97% ee; >20:1 dr,  $[\alpha]_D^{20} = +92.3$  (c 1.0, CH<sub>2</sub>Cl<sub>2</sub>); m.p.185.3-186.7 °C; The

ee was determined by HPLC analysis using a Chiralpak OD-H column (50/50 hexane/i-PrOH; flow rate: 1.0 mL/min;  $\lambda = 254$  nm;  $t_{\text{major}} = 11.25$  min,  $t_{\text{minor}} = 7.65$  min); <sup>1</sup>H NMR (300 MHz, CDCl<sub>3</sub>)  $\delta$  7.99 (d,  $J = 1.9$  Hz, 1H), 7.81 (d,  $J = 7.6$  Hz, 1H), 7.74-7.61 (m, 3H), 7.55 (t,  $J = 7.3$  Hz, 1H), 7.15 (dd,  $J = 8.5, 2.0$  Hz, 1H), 5.25 (d,  $J = 6.9$  Hz, 1H), 5.11 (d,  $J = 5.9$  Hz, 1H), 3.90 (t,  $J = 6.4$  Hz, 1H), 3.68 (s, 1H), 1.73 (s, 9H). <sup>13</sup>C NMR (75 MHz, CDCl<sub>3</sub>)  $\delta$  149.9, 138.5, 136.9, 136.0, 134.4, 130.3, 129.8, 127.8, 127.2, 126.2, 123.9, 122.7, 120.3, 117.9, 115.3, 112.6, 86.7, 67.3, 62.6, 40.5, 28.3. HRMS (ESI) Calcd. for C<sub>22</sub>H<sub>20</sub>BrNNaO<sub>5</sub>S<sub>2</sub> [M+Na]<sup>+</sup>: 543.9858; found: 543.9842.

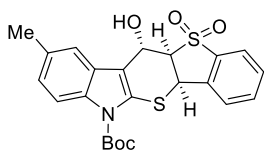

**tert-butyl(6aR,11aR,12S)-12-hydroxy-2-methyl-11a,12-dihydrobenzo[4',5']thieno[2',3':5,6]thiopyrano[2,3-b]indole-5(6aH)-carboxylate 11,11-dioxide(3g):** white solid; 98% yield; 93% ee; >20:1 dr,  $[\alpha]_D^{20} = +75.4$  (c 1.0, CH<sub>2</sub>Cl<sub>2</sub>); m.p.184.5.-185.3 °C; The ee was

determined by HPLC analysis using a Chiralpak OD-H column (50/50 hexane/i-PrOH; flow rate: 1.0 mL/min;  $\lambda = 254$  nm;  $t_{\text{major}} = 9.89$  min,  $t_{\text{minor}} = 6.08$  min); <sup>1</sup>H NMR (300 MHz, CDCl<sub>3</sub>)  $\delta$  7.81 (dd,  $J = 10.6, 8.0$  Hz, 2H), 7.69 (d,  $J = 7.7$  Hz, 1H), 7.62 (td,  $J = 7.5, 1.3$  Hz, 1H), 7.54 (d,  $J = 7.3$  Hz, 2H), 7.05 (s, 1H), 5.30 (d,  $J = 6.5$  Hz, 1H), 5.07 (d,  $J = 5.8$  Hz, 1H), 3.88 (t,  $J = 6.2$  Hz, 1H), 3.50 (s, 1H), 2.39 (s, 3H), 1.72 (s, 9H). <sup>13</sup>C NMR (75 MHz, CDCl<sub>3</sub>)  $\delta$  150.4, 138.7, 137.1, 134.3, 133.8, 133.1, 130.2, 128.9, 127.2, 126.1, 125.1, 122.7, 119.4, 114.6, 112.5, 85.8, 67.5, 62.4, 40.4, 28.4, 21.4; HRMS (ESI) Calcd. for C<sub>23</sub>H<sub>23</sub>NNaO<sub>5</sub>S<sub>2</sub> [M+Na]<sup>+</sup>: 480.0910; found: 480.0901.

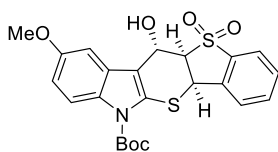

**tert-butyl(6aR,11aR,12S)-12-hydroxy-2-methoxy-11a,12-dihydrobenzo[4',5']thieno[2',3':5,6]thiopyrano[2,3-b]indole-5(6aH)-carboxylate 11,11-dioxide (3h):** white solid; 96% yield; 97% ee; >20:1 dr,  $[\alpha]_D^{20} = +94.8$  (c 1.0, CH<sub>2</sub>Cl<sub>2</sub>); m.p.193.2.-194.7 °C; The

ee was determined by HPLC analysis using a Chiralpak OD-H column (50/50 hexane/i-PrOH; flow rate: 1.0 mL/min;  $\lambda = 254$  nm;  $t_{\text{major}} = 9.99$  min,  $t_{\text{minor}} = 7.17$  min); <sup>1</sup>H NMR (300 MHz, CDCl<sub>3</sub>)  $\delta$  7.82 (t,  $J = 8.4$  Hz, 2H), 7.70 (d,  $J = 7.7$  Hz, 1H), 7.63 (td,  $J = 7.4, 1.2$  Hz, 1H), 7.53 (t,  $J = 7.5$  Hz, 1H), 7.24 (d,  $J = 2.6$  Hz, 1H), 6.81 (dd,  $J = 9.1, 2.7$  Hz, 1H), 5.28 (dd,  $J = 6.8, 4.3$  Hz, 1H), 5.10 (d,  $J = 5.8$  Hz, 1H), 3.91 (t,  $J = 6.3$  Hz, 1H), 3.81 (s, 3H), 3.53 (d,  $J = 4.8$  Hz, 1H), 1.71 (s, 9H). <sup>13</sup>C NMR (75 MHz, CDCl<sub>3</sub>)  $\delta$  156.3, 150.3, 138.8, 137.0, 134.3, 130.2, 129.6, 127.7, 126.2, 122.7, 115.7, 112.5, 102.1, 85.8, 67.5, 62.6, 55.8, 40.4, 28.4; HRMS (ESI) Calcd. for C<sub>23</sub>H<sub>23</sub>NNaO<sub>6</sub>S<sub>2</sub> [M+Na]<sup>+</sup>: 496.0859; found: 496.0855.

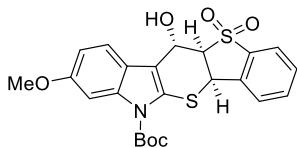

**tert-butyl(6aR,11aR,12S)-12-hydroxy-3-methoxy-11a,12-dihydrobenzo[4',5']thieno[2',3':5,6]thiopyrano[2,3-b]indole-5(6aH)-carboxylate 11,11-dioxide (3i):** white solid; 98% yield; 99% ee; >20:1 dr,  $[\alpha]_D^{20} = +29.4$  (c 1.0, CH<sub>2</sub>Cl<sub>2</sub>); m.p.188.6-189.3 °C; The

ee was determined by HPLC analysis using a Chiralpak OD-H column (50/50 hexane/i-PrOH; flow rate: 1.0 mL/min;  $\lambda = 254$  nm;  $t_{\text{major}} = 9.76$  min,  $t_{\text{minor}} = 7.24$  min); <sup>1</sup>H NMR (300 MHz, DMSO-*d*<sub>6</sub>)  $\delta$  7.79 (d,  $J = 7.6$  Hz, 1H), 7.70 (d,  $J = 7.7$  Hz, 1H), 7.67-7.57 (m, 3H), 7.52 (d,  $J = 7.4$  Hz, 1H), 6.84 (d,  $J = 2.1$  Hz, 1H), 5.26 (dd,  $J = 7.0, 3.6$  Hz, 1H), 5.06 (d,  $J = 5.9$  Hz, 1H), 3.89 (s, 1H), 3.82 (s, 3H), 3.57 (d,  $J = 4.7$  Hz, 1H), 1.72 (s, 9H). <sup>13</sup>C NMR (75 MHz, CDCl<sub>3</sub>)  $\delta$  157.3, 150.3, 138.7,

137.1, 136.7, 134.3, 130.2, 126.2, 124.9, 122.6, 120.1, 113.2, 111.9, 100.1, 85.8, 67.7, 62.9, 55.7, 40.7, 28.4; HRMS (ESI) Calcd. for C<sub>23</sub>H<sub>23</sub>NNaO<sub>6</sub>S<sub>2</sub> [M+Na]<sup>+</sup>: 496.0859; found: 496.0861.

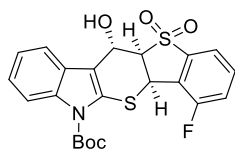

**tert-butyl(6aR,11aR,12S)-7-fluoro-12-hydroxy-11a,12-dihydrobenzo[4',5']thieno[2',3':5,6]thiopyrano[2,3-b]indole-5(6aH)-carboxylate 11,11-dioxide (3j):** white solid; 99% yield; 99% ee; >20:1 dr,  $[\alpha]_D^{20} = +0.5$  (c 1.0, CH<sub>2</sub>Cl<sub>2</sub>); m.p.313.2-314.4 °C; The ee was determined

by HPLC analysis using a Chiralpak OD-H column (50/50 hexane/i-PrOH; flow rate: 1.0 mL/min;  $\lambda = 254$  nm;  $t_{\text{major}} = 5.33$  min,  $t_{\text{minor}} = 4.76$  min); <sup>1</sup>H NMR (300 MHz, CDCl<sub>3</sub>)  $\delta$  8.03-7.95 (m, 1H), 7.75-7.66 (m, 1H), 7.64-7.53 (m, 2H), 7.36 (m, 1H), 7.29-7.20 (m, 3H), 5.67 (s, 1H), 5.25 (d,  $J = 6.8$  Hz, 1H), 4.17 (dd,  $J = 6.8, 3.0$  Hz, 1H), 2.96 (d,  $J = 5.2$  Hz, 1H), 1.67 (s, 9H). <sup>13</sup>C NMR (75 MHz, CDCl<sub>3</sub>)  $\delta$  159.1 (d,  $J = 256.8$  Hz), 150.2, 140.1, 135.9, 132.8 (d,  $J = 7.0$  Hz), 128.9, 128.6, 124.4 (d,  $J = 20.3$  Hz), 124.1, 123.6, 121.0 (d,  $J = 20.0$  Hz), 118.5 (d,  $J = 4.3$  Hz), 118.0, 115.2, 112.7, 86.1, 67.2, 59.9, 35.1, 28.3; HRMS (ESI) Calcd. for C<sub>22</sub>H<sub>20</sub>FNNaO<sub>5</sub>S<sub>2</sub> [M+Na]<sup>+</sup>: 484.0659; found: 484.0650.

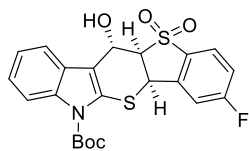

**tert-butyl(6aR,11aR,12S)-8-fluoro-12-hydroxy-11a,12-dihydrobenzo[4',5']thieno[2',3':5,6]thiopyrano[2,3-b]indole-5(6aH)-carboxylate 11,11-dioxide (3k):** white solid; 97% yield; 98% ee; 13:1 dr,  $[\alpha]_D^{20} = +82.1$  (c 1.0, CH<sub>2</sub>Cl<sub>2</sub>); m.p.180.3-181.2 °C; The ee was determined

by HPLC analysis using a Chiralpak OD-H column (70/30 hexane/i-PrOH; flow rate: 1.0 mL/min;  $\lambda = 254$  nm;  $t_{\text{major}} = 13.17$  min,  $t_{\text{minor}} = 9.68$  min); <sup>1</sup>H NMR (300 MHz, CDCl<sub>3</sub>)  $\delta$  8.06-7.89 (m, 1H), 7.76 (2H), 7.40 (d,  $J = 8.1$  Hz, 1H), 7.30-7.11 (m, 3H), 5.30 (d,  $J = 3.4$  Hz, 1H), 5.03 (d,  $J = 5.8$  Hz, 1H), 3.88 (t,  $J = 6.3$  Hz, 1H), 3.56 (d,  $J = 4.9$  Hz, 1H), 1.74 (s, 9H). <sup>13</sup>C NMR (100 MHz, CDCl<sub>3</sub>)  $\delta$  166.2 (d,  $J = 257.0$  Hz), 150.4, 142.5 (d,  $J = 9.1$  Hz), 135.6, 132.9, 128.7, 126.8, 125.2 (d,  $J = 9.9$  Hz), 124.0, 123.5, 119.6, 117.9 (d,  $J = 24.0$  Hz), 114.9, 113.7 (d,  $J = 24.7$  Hz), 112.6, 86.2, 67.7, 62.5, 40.1, 28.4; HRMS (ESI) Calcd. for C<sub>22</sub>H<sub>20</sub>FNNaO<sub>5</sub>S<sub>2</sub> [M+Na]<sup>+</sup>: 484.0659 found: 484.0649.

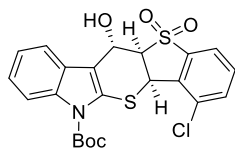

**tert-butyl(6aR,11aR,12S)-7-chloro-12-hydroxy-11a,12-dihydrobenzo[4',5']thieno[2',3':5,6]thiopyrano[2,3-b]indole-5(6aH)-carboxylate 11,11-dioxide (3l):** white solid; 98% yield; 97% ee; >20:1 dr,  $[\alpha]_D^{20} = +0.4$  (c 1.0, CH<sub>2</sub>Cl<sub>2</sub>); m.p.195.4-196.3 °C; The ee was determined

by HPLC analysis using a Chiralpak OD-H column (50/50 hexane/i-PrOH; flow rate: 1.0 mL/min;  $\lambda = 254$  nm;  $t_{\text{major}} = 5.32$  min,  $t_{\text{minor}} = 4.70$  min); <sup>1</sup>H NMR (300 MHz, CDCl<sub>3</sub>)  $\delta$  8.04-7.94 (m, 1H), 7.73-7.59 (m, 3H), 7.50 (t,  $J = 7.8$  Hz, 1H), 7.26-7.19 (m, 2H), 5.73 (s, 1H), 5.28 (d,  $J = 6.6$  Hz, 1H), 4.21 (dd,  $J = 6.7, 2.1$  Hz, 1H), 2.93 (s, 1H), 1.66 (s, 9H). <sup>13</sup>C NMR (75 MHz, CDCl<sub>3</sub>)  $\delta$  150.2, 139.6, 135.8, 135.3, 134.3, 133.1, 131.8, 129.3, 128.7, 124.0, 123.6, 121.1, 117.4, 115.2, 111.8, 86.0, 66.6, 58.5, 37.0, 28.3; HRMS (ESI) Calcd. for C<sub>22</sub>H<sub>20</sub>ClNNaO<sub>5</sub>S<sub>2</sub> [M+Na]<sup>+</sup>: 500.0364; found: 500.0368.

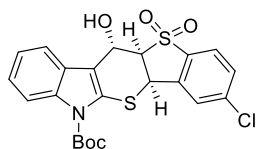

**tert-butyl(6aR,11aR,12S)-8-chloro-12-hydroxy-11a,12-dihydrobenzo[4',5']thieno[2',3':5,6]thiopyrano[2,3-b]indole-5(6aH)-carboxylate 11,11-dioxide (3m):** white solid; 98% yield; 98% ee; 13:1 dr,  $[\alpha]_D^{20} = +145.3$  (c 1.0, CH<sub>2</sub>Cl<sub>2</sub>); m.p.127.3-128.2 °C; The ee was

determined by HPLC analysis using a Chiralpak IC-H column (30/70 hexane/i-PrOH; flow rate: 1.0 mL/min;  $\lambda = 254$  nm;  $t_{\text{major}} = 10.13$  min,  $t_{\text{minor}} = 8.36$  min); <sup>1</sup>H NMR (300 MHz, CDCl<sub>3</sub>)  $\delta$  8.01-7.91 (m, 1H), 7.78-7.65 (m, 3H), 7.49 (dd,  $J = 8.1, 1.8$  Hz, 1H), 7.25-7.16 (m, 2H), 5.28 (t,  $J = 5.4$  Hz, 1H), 5.01 (d,  $J = 5.7$  Hz, 1H), 3.86 (t,  $J = 6.2$  Hz, 1H), 3.58 (d,  $J = 4.6$  Hz, 1H), 1.74 (s, 9H).

$^{13}\text{C}$  NMR (100 MHz,  $\text{CDCl}_3$ )  $\delta$  150.4, 141.0, 140.9, 135.6, 135.5, 130.6, 128.7, 126.9, 126.5, 124.0, 124.0, 123.5, 119.5, 114.9, 112.6, 86.2, 67.5, 62.3, 40.0, 28.4; HRMS (ESI) Calcd. for  $\text{C}_{22}\text{H}_{20}\text{ClNNaO}_5\text{S}_2$   $[\text{M}+\text{Na}]^+$ : 500.0364; found: 500.0348.

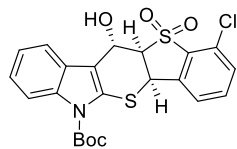

***tert*-butyl(6aR,11aR,12S)-12-hydroxy-10-chloro-11a,12-dihydrobenzo[4',5']thieno[2',3':5,6]thiopyrano[2,3-b]indole-5(6aH)-carboxylate 11,11-dioxide (3n)**: white solid; 99% yield; 78% ee; >20:1 dr,  $[\alpha]_{\text{D}}^{20} = +10.3$  (*c* 1.0,  $\text{CH}_2\text{Cl}_2$ ); m.p.303.1-304.3 °C; The ee was determined

by HPLC analysis using a Chiralpak OD-H column (50/50 hexane/*i*-PrOH; flow rate: 1.0 mL/min;  $\lambda = 254$  nm;  $t_{\text{major}} = 8.96$  min,  $t_{\text{minor}} = 6.31$  min)  $^1\text{H}$  NMR (300 MHz,  $\text{DMSO}-d_6$ )  $\delta$  7.96 (dd,  $J = 6.2, 3.3$  Hz, 1H), 7.84-7.66 (m, 4H), 7.28 (dd,  $J = 6.0, 3.2$  Hz, 2H), 6.43 (s, 1H), 5.43 (s, 1H), 5.34 (d,  $J = 6.7$  Hz, 1H), 4.55 (dd,  $J = 6.8, 2.8$  Hz, 1H), 1.62 (s, 9H).  $^{13}\text{C}$  NMR (100 MHz,  $\text{DMSO}-d_6$ )  $\delta$  149.4, 140.4, 135.8, 134.9, 134.5, 131.3, 128.8, 128.2, 127.8, 125.8, 123.7, 123.1, 118.5, 114.5, 114.3, 85.6, 67.6, 58.0, 38.3, 27.6; HRMS (ESI) Calcd. for  $\text{C}_{22}\text{H}_{20}\text{ClNNaO}_5\text{S}_2$   $[\text{M}+\text{Na}]^+$ : 500.0364; found: 500.0357.

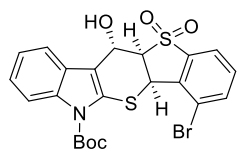

***tert*-butyl(6aR,11aR,12S)-7-bromo-12-hydroxy-11a,12-dihydrobenzo[4',5']thieno[2',3':5,6]thiopyrano[2,3-b]indole-5(6aH)-carboxylate 11,11-dioxide (3o)**: white solid; 99% yield; 97% ee; >20:1 dr,  $[\alpha]_{\text{D}}^{20} = +276.9$  (*c* 1.0,  $\text{CH}_2\text{Cl}_2$ ); m.p.194.4-195.3 °C; The ee was determined

by HPLC analysis using a Chiralpak OD-H column (50/50 hexane/*i*-PrOH; flow rate: 1.0 mL/min;  $\lambda = 254$  nm;  $t_{\text{major}} = 5.64$  min,  $t_{\text{minor}} = 4.96$  min)  $^1\text{H}$  NMR (300 MHz,  $\text{DMSO}-d_6$ )  $\delta$  8.06 (d,  $J = 7.9$  Hz, 1H), 8.00-7.89 (m, 2H), 7.77-7.68 (m, 1H), 7.63 (t,  $J = 7.8$  Hz, 1H), 7.36-7.23 (m, 2H), 6.27 (d,  $J = 7.6$  Hz, 1H), 5.47 (dd,  $J = 7.6, 1.9$  Hz, 1H), 5.33 (d,  $J = 6.6$  Hz, 1H), 4.69 (dd,  $J = 6.6, 2.0$  Hz, 1H), 1.62 (s, 9H).  $^{13}\text{C}$  NMR (101 MHz,  $\text{DMSO}$ )  $\delta$  149.5, 139.2, 137.6, 137.4, 134.9, 132.5, 128.9, 127.9, 123.6, 123.2, 121.5, 121.5, 117.9, 114.6, 112.9, 85.7, 65.5, 56.3, 38.8, 27.7; HRMS (ESI) Calcd. for  $\text{C}_{22}\text{H}_{20}\text{BrNNaO}_5\text{S}_2$   $[\text{M}+\text{Na}]^+$ : 543.9858; found: 543.9840.

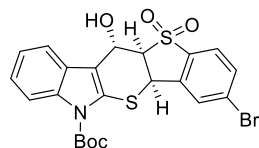

***tert*-butyl(6aR,11aR,12S)-8-bromo-12-hydroxy-11a,12-dihydrobenzo[4',5']thieno[2',3':5,6]thiopyrano[2,3-b]indole-5(6aH)-carboxylate 11,11-dioxide (3p)**: white solid; 99% yield; 98% ee; 12:1 dr,  $[\alpha]_{\text{D}}^{20} = +165.5$  (*c* 1.0,  $\text{CH}_2\text{Cl}_2$ ); m.p.137.1-138.2 °C; The ee was

determined by HPLC analysis using a Chiralpak IC-H column (30/70 hexane/*i*-PrOH; flow rate: 1.0 mL/min;  $\lambda = 254$  nm;  $t_{\text{major}} = 9.65$  min,  $t_{\text{minor}} = 8.14$  min);  $^1\text{H}$  NMR (300 MHz,  $\text{CDCl}_3$ )  $\delta$  8.01-7.92 (m, 1H), 7.86-7.82 (m, 1H), 7.78-7.70 (m, 1H), 7.68-7.62 (m, 2H), 7.25-7.18 (m, 2H), 5.28 (dd,  $J = 6.9, 4.1$  Hz, 1H), 5.02 (d,  $J = 5.7$  Hz, 1H), 3.85 (t,  $J = 6.3$  Hz, 1H), 3.56 (d,  $J = 4.7$  Hz, 1H), 1.74 (s, 9H).  $^{13}\text{C}$  NMR (100 MHz,  $\text{CDCl}_3$ )  $\delta$  150.4, 141.0, 136.0, 135.6, 133.5, 129.5, 129.3, 128.7, 126.9, 124.1, 124.0, 123.5, 119.5, 114.9, 112.6, 86.2, 67.5, 62.3, 40.0, 28.4; HRMS (ESI) Calcd. for  $\text{C}_{22}\text{H}_{20}\text{BrNNaO}_5\text{S}_2$   $[\text{M}+\text{Na}]^+$ : 543.9858; found: 543.9841.

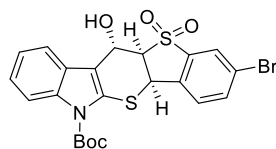

***tert*-butyl(6aR,11aR,12S)-7-bromo-12-hydroxy-11a,12-dihydrobenzo[4',5']thieno[2',3':5,6]thiopyrano[2,3-b]indole-5(6aH)-carboxylate 11,11-dioxide (3q)**: white solid; 99% yield; 99% ee; >20:1 dr,  $[\alpha]_{\text{D}}^{20} = +85.4$  (*c* 1.0,  $\text{CH}_2\text{Cl}_2$ ); m.p.184.3-185.6 °C; The ee was

determined by HPLC analysis using a Chiralpak IC-H column (30/70 hexane/*i*-PrOH; flow rate: 1.0 mL/min;  $\lambda = 254$  nm;  $t_{\text{major}} = 8.29$  min,  $t_{\text{minor}} = 7.17$  min);  $^1\text{H}$  NMR (300 MHz,  $\text{DMSO}-d_6$ )  $\delta$  8.18 (d,  $J = 1.8$  Hz, 1H), 7.96 (m, 2H), 7.74 (dd,  $J = 6.9, 3.2$  Hz, 2H), 7.33-7.23 (m, 2H), 6.40 (d,  $J = 7.1$  Hz, 1H), 5.40 (dd,  $J = 7.1, 3.0$  Hz, 1H), 5.31 (d,  $J = 6.5$  Hz, 1H), 4.48 (dd,  $J = 6.6, 2.9$  Hz, 1H), 1.62



(s, 9H). <sup>13</sup>C NMR (100 MHz, DMSO-*d*<sub>6</sub>) δ 149.5, 139.5, 137.3, 136.9, 135.0, 129.1, 128.8, 128.0, 125.1, 123.8, 123.3, 123.2, 118.5, 114.6, 114.4, 85.8, 67.5, 58.1, 38.7, 27.7; HRMS (ESI) Calcd. for C<sub>22</sub>H<sub>20</sub>BrNNaO<sub>5</sub>S<sub>2</sub> [M+Na]<sup>+</sup>: 543.9858; found: 543.9838.

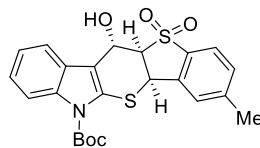

**tert-butyl(6aR,11aR,12S)-12-hydroxy-8-methyl-11a,12-dihydrobenzo[4',5']thieno[2',3':5,6]thiopyrano[2,3-b]indole-5(6aH)-carboxylate 11,11-dioxide (3r):** white solid; 98% yield; 98% ee; >20:1 dr, [α]<sub>D</sub><sup>20</sup> = +87.4 (c 1.0, CH<sub>2</sub>Cl<sub>2</sub>); m.p.185.3-185.8 °C; The ee was

determined by HPLC analysis using a Chiralpak OD-H column (50/50 hexane/*i*-PrOH; flow rate: 1.0 mL/min; λ = 254 nm; *t*<sub>major</sub> = 12.73 min, *t*<sub>minor</sub> = 10.03 min); <sup>1</sup>H NMR (400 MHz, DMSO-*d*<sub>6</sub>) δ 7.94 (dd, *J* = 6.4, 3.0 Hz, 1H), 7.76 (dd, *J* = 8.5, 3.7 Hz, 2H), 7.56 (s, 1H), 7.47 (d, *J* = 7.9 Hz, 1H), 7.31-7.24 (m, 2H), 6.37 (dd, *J* = 7.1, 2.3 Hz, 1H), 5.38 (m, 1H), 5.27 (d, *J* = 6.6 Hz, 1H), 4.36 (dd, *J* = 6.6, 3.0 Hz, 1H), 2.44 (s, 3H), 1.62 (s, 9H). <sup>13</sup>C NMR (100 MHz, DMSO-*d*<sub>6</sub>) δ 149.6, 145.2, 137.6, 134.9, 134.9, 131.3, 128.9, 128.2, 127.1, 123.7, 123.2, 122.0, 118.6, 114.6, 85.7, 67.4, 58.3, 39.0, 27.7, 21.3; HRMS (ESI) Calcd. for C<sub>23</sub>H<sub>23</sub>NNaO<sub>5</sub>S<sub>2</sub> [M+Na]<sup>+</sup>: 480.0910; found: 480.0904.

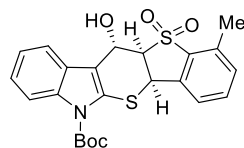

**tert-butyl(6aR,11aR,12S)-12-hydroxy-10-methyl-11a,12-dihydrobenzo[4',5']thieno[2',3':5,6]thiopyrano[2,3-b]indole-5(6aH)-carboxylate 11,11-dioxide (3s):** white solid; 81% yield; 61% ee; >20:1 dr, [α]<sub>D</sub><sup>20</sup> = +13.2 (c 1.0, CH<sub>2</sub>Cl<sub>2</sub>); m.p.191.8.-192.4 °C; The ee was determined

by HPLC analysis using a Chiralpak OD-H column (50/50 hexane/*i*-PrOH; flow rate: 1.0 mL/min; λ = 254 nm; *t*<sub>major</sub> = 7.29 min, *t*<sub>minor</sub> = 5.46 min) <sup>1</sup>H NMR (400 MHz, DMSO-*d*<sub>6</sub>) δ 7.99-7.93 (m, 1H), 7.80-7.74 (m, 1H), 7.65 (t, *J* = 7.6 Hz, 1H), 7.56 (d, *J* = 7.6 Hz, 1H), 7.45 (d, *J* = 7.6 Hz, 1H), 7.28 (dd, *J* = 6.0, 3.2 Hz, 2H), 6.38 (d, *J* = 7.2 Hz, 1H), 5.40 (dd, *J* = 7.2, 3.0 Hz, 1H), 5.29 (d, *J* = 6.8 Hz, 1H), 4.39 (dd, *J* = 6.8, 3.0 Hz, 1H), 2.53 (s, 3H), 1.62 (s, 9H). <sup>13</sup>C NMR (100 MHz, DMSO-*d*<sub>6</sub>) δ 149.5, 137.5, 135.5, 135.0, 134.9, 134.1, 132.1, 128.9, 128.1, 124.3, 123.7, 123.2, 118.5, 114.6, 114.5, 85.6, 67.3, 58.3, 38.8, 27.7, 16.4; HRMS (ESI) Calcd. for C<sub>23</sub>H<sub>23</sub>NNaO<sub>5</sub>S<sub>2</sub> [M+Na]<sup>+</sup>: 480.0910; found: 480.0913.

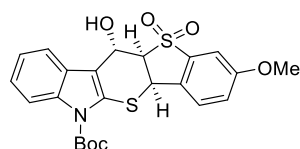

**tert-butyl(6aR,11aR,12S)-12-hydroxy-9-methoxy-11a,12-dihydrobenzo[4',5']thieno[2',3':5,6]thiopyrano[2,3-b]indole-5(6aH)-carboxylate 11,11-dioxide (3t):** white solid; 99% yield; 99% ee; >20:1 dr, [α]<sub>D</sub><sup>20</sup> = +113.3 (c 1.0, CH<sub>2</sub>Cl<sub>2</sub>); m.p.182.3-183.8 °C; The

ee was determined by HPLC analysis using a Chiralpak OD-H column (50/50 hexane/*i*-PrOH; flow rate: 1.0 mL/min; λ = 254 nm; *t*<sub>major</sub> = 13.43 min, *t*<sub>minor</sub> = 10.44 min); <sup>1</sup>H NMR (300 MHz, DMSO-*d*<sub>6</sub>) δ 8.01-7.93 (m, 1H), 7.82-7.73 (m, 1H), 7.68 (d, *J* = 8.6 Hz, 1H), 7.43 (d, *J* = 2.5 Hz, 1H), 7.36-7.23 (m, 3H), 6.37 (d, *J* = 7.2 Hz, 1H), 5.40 (dd, *J* = 7.1, 3.1 Hz, 1H), 5.25 (d, *J* = 6.7 Hz, 1H), 4.39 (dd, *J* = 6.7, 3.1 Hz, 1H), 3.87 (s, 3H), 1.62 (s, 9H). <sup>13</sup>C NMR (100 MHz, DMSO-*d*<sub>6</sub>) δ 160.8, 149.4, 139.0, 135.0, 128.8, 128.7, 128.2, 128.1, 123.6, 123.1, 121.6, 118.6, 114.9, 114.5, 105.6, 85.5, 68.3, 58.7, 56.2, 38.8, 27.7; HRMS (ESI) Calcd. for C<sub>23</sub>H<sub>23</sub>NNaO<sub>6</sub>S<sub>2</sub> [M+Na]<sup>+</sup>: 496.0859; found: 496.0845.

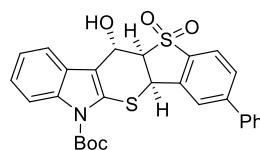

**tert-butyl(6aR,11aR,12S)-12-hydroxy-8-phenyl-11a,12-dihydrobenzo[4',5']thieno[2',3':5,6]thiopyrano[2,3-b]indole-5(6aH)-carboxylate 11,11-dioxide (3u):** white solid; 98% yield; 98% ee; >20:1 dr, [α]<sub>D</sub><sup>20</sup> = +208.4 (c 1.0, CH<sub>2</sub>Cl<sub>2</sub>); m.p.182.3-183.7 °C; The ee was

determined by HPLC analysis using a Chiralpak OD-H column (50/50 hexane/*i*-PrOH; flow rate: 1.0 mL/min; λ = 254 nm; *t*<sub>major</sub> = 8.44 min, *t*<sub>minor</sub> = 6.94 min); <sup>1</sup>H NMR (300 MHz, CDCl<sub>3</sub>) δ 8.01-

7.93 (m, 1H), 7.86 (d,  $J = 7.8$  Hz, 2H), 7.82-7.70 (m, 2H), 7.62-7.53 (m, 2H), 7.47 (q,  $J = 8.3, 7.3$  Hz, 3H), 7.21 (dd,  $J = 5.8, 2.9$  Hz, 2H), 5.36 (dd,  $J = 6.8, 4.5$  Hz, 1H), 5.15 (d,  $J = 5.8$  Hz, 1H), 3.94 (t,  $J = 6.2$  Hz, 1H), 3.60 (d,  $J = 4.7$  Hz, 1H), 1.73 (s, 9H).  $^{13}\text{C}$  NMR (75 MHz,  $\text{CDCl}_3$ )  $\delta$  150.5, 147.8, 139.5, 139.1, 135.6, 135.5, 129.2, 129.2, 129.0, 128.8, 127.6, 124.7, 123.8, 123.5, 123.1, 119.6, 114.9, 112.8, 86.0, 67.7, 62.6, 40.4, 28.4; HRMS (ESI) Calcd. for  $\text{C}_{28}\text{H}_{25}\text{NNaO}_5\text{S}_2$   $[\text{M}+\text{Na}]^+$ : 542.1066; found: 542.1056.

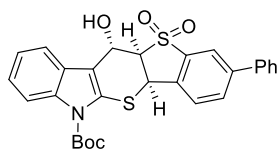

**tert-butyl(6aR,11aR,12S)-12-hydroxy-9-phenyl-11a,12-dihydrobenzo[4',5']thieno[2',3':5,6]thiopyrano[2,3-b]indole-5(6aH)-carboxylate 11,11-dioxide (3v):** white solid; 98% yield; 99% ee; >20:1 dr,  $[\alpha]_{\text{D}}^{20} = +98.2$  ( $c$  1.0,  $\text{CH}_2\text{Cl}_2$ ); m.p.106.5-107.5 °C; The ee

was determined by HPLC analysis using a Chiralpak OD-H column (50/50 hexane/*i*-PrOH; flow rate: 1.0 mL/min;  $\lambda = 254$  nm;  $t_{\text{major}} = 8.44$  min,  $t_{\text{minor}} = 6.73$  min)  $^1\text{H}$  NMR (300 MHz,  $\text{CDCl}_3$ )  $\delta$  7.99 (q,  $J = 3.8$  Hz, 2H), 7.86-7.71 (m, 3H), 7.56 (dt,  $J = 5.8, 1.7$  Hz, 2H), 7.51-7.37 (m, 3H), 7.25-7.15 (m, 2H), 5.39 (d,  $J = 6.5$  Hz, 1H), 5.13 (d,  $J = 5.9$  Hz, 1H), 3.96 (t,  $J = 6.2$  Hz, 1H), 3.57 (s, 1H), 1.74 (s, 9H).  $^{13}\text{C}$  NMR (75 MHz,  $\text{CDCl}_3$ )  $\delta$  150.4, 143.9, 138.7, 137.8, 137.3, 135.7, 133.1, 129.3, 128.8, 128.7, 127.3, 126.5, 123.9, 123.5, 121.0, 119.5, 114.9, 112.9, 86.0, 67.8, 62.5, 40.2, 28.4; HRMS (ESI) Calcd. for  $\text{C}_{28}\text{H}_{25}\text{NNaO}_5\text{S}_2$   $[\text{M}+\text{Na}]^+$ : 542.1066; found: 542.1067.

## 6. General experimental procedures for asymmetric synthesis of compounds 5

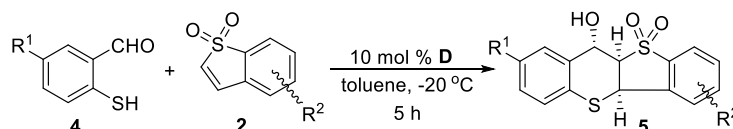

To a reaction tube were added, the benzo[*b*]thiophene 1,1-dioxide **2** (0.1 mmol, 1.0 equiv.), 2-mercaptobenzaldehyde **4** (0.11 mmol, 1.1 equiv.), catalyst **D** (0.01 mmol) and toluene (0.5 mL). The reaction mixture was stirred at -20 °C, and monitored by TLC. the reaction mixture was directly purified by flash chromatography on silica gel (petroleum ether/ethyl acetate = 3:1) to afford the desired product **5**.

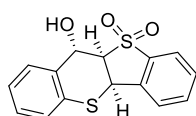

**(5aR,10aR,11S)-11-hydroxy-5a,10a-dihydro-11H-benzo[4,5]thieno[3,2-b]thiochromene 10,10-dioxide (5a)** : white solid; 92% yield; 93% ee; >20:1 dr,  $[\alpha]_{\text{D}}^{20} = +158.3$  ( $c$  1.0,  $\text{CH}_2\text{Cl}_2$ ); m.p.260.1-261.7 °C; The ee was determined

by HPLC analysis using a Chiralpak AD-H column (50/50 hexane/*i*-PrOH; flow rate: 1.0 mL/min;  $\lambda = 254$  nm;  $t_{\text{major}} = 10.02$  min,  $t_{\text{minor}} = 9.25$  min);  $^1\text{H}$  NMR (300 MHz,  $\text{DMSO}-d_6$ )  $\delta$  7.92 (d,  $J = 7.3$  Hz, 1H), 7.84-7.75 (m, 1H), 7.71 (t,  $J = 6.6$  Hz, 3H), 7.56-7.49 (m, 1H), 7.48-7.39 (m, 1H), 7.34 (t,  $J = 7.5$  Hz, 1H), 6.62 (d,  $J = 6.5$  Hz, 1H), 5.17-5.07 (m, 1H), 5.05 (d,  $J = 8.6$  Hz, 1H), 4.00 (t,  $J = 8.9$  Hz, 1H).  $^{13}\text{C}$  NMR (100 MHz,  $\text{DMSO}-d_6$ )  $\delta$  141.6, 140.0, 134.4, 134.3, 131.9, 130.8, 129.2, 127.9, 127.6, 127.4, 125.0, 121.5, 68.8, 68.0, 44.4; HRMS (ESI) Calcd. for  $\text{C}_{15}\text{H}_{12}\text{NaO}_3\text{S}_2$   $[\text{M}+\text{Na}]^+$ : 327.0120; found: 327.0132.

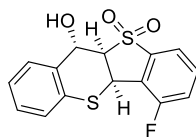

**(5aR,10aR,11S)-6-fluoro-11-hydroxy-5a,10a-dihydro-11H-benzo[4,5]thieno[3,2-b]thiochromene 10,10-dioxide (5b):** white solid; 98% yield; 95% ee; >20:1 dr,  $[\alpha]_{\text{D}}^{20} = +222.3$  ( $c$  1.0,  $\text{CH}_2\text{Cl}_2$ ); m.p.178.4-179.7 °C;

The ee was determined by HPLC analysis using a Chiralpak AD-H column (50/50 hexane/*i*-PrOH; flow rate: 1.0 mL/min;  $\lambda = 254$  nm;  $t_{\text{major}} = 11.63$  min,  $t_{\text{minor}} = 7.11$  min);  $^1\text{H}$  NMR (300 MHz,  $\text{CDCl}_3$ )  $\delta$  7.83 (d,  $J = 7.6$  Hz, 1H), 7.64 (m, 2H), 7.56-7.47 (m, 1H), 7.46-7.29 (m, 3H), 5.43 (dd,  $J = 9.0, 4.3$  Hz, 1H), 4.93 (d,  $J = 8.9$  Hz, 1H), 3.83 (t,  $J = 9.0$  Hz, 1H), 3.70 (d,  $J =$

5.3 Hz, 1H). <sup>13</sup>C NMR (100 MHz, CDCl<sub>3</sub>) δ 159.8 (d, *J* = 258.0 Hz), 141.9 (d, *J* = 3.1 Hz), 139.6, 133.2 (d, *J* = 7.1 Hz), 131.7, 129.8, 128.2, 128.0, 124.9, 122.4 (d, *J* = 19.8 Hz), 121.0 (d, *J* = 19.9 Hz), 118.0 (d, *J* = 4.3 Hz), 70.1, 69.5, 40.9; HRMS (ESI) Calcd. for C<sub>15</sub>H<sub>11</sub>FNaO<sub>3</sub>S<sub>2</sub> [M+Na]<sup>+</sup>: 345.0026; found: 345.0035.

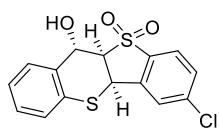

**(5aR,10aR,11S)-7-chloro-11-hydroxy-5a,10a-dihydro-11H-benzo[4,5]thieno[3,2-b]thiochromene 10,10-dioxide (5c):** white solid; 98% yield; 93% ee; >20:1 dr, [α]<sub>D</sub><sup>20</sup> = +101.3 (c 1.0, CH<sub>2</sub>Cl<sub>2</sub>); m.p.221.4-222.7 °C; The ee was determined by HPLC analysis using a Chiralpak AD-H column

(50/50 hexane/*i*-PrOH; flow rate: 1.0 mL/min; λ = 254 nm; *t*<sub>major</sub> = 19.01 min, *t*<sub>minor</sub> = 11.74 min); <sup>1</sup>H NMR (300 MHz, DMSO-*d*<sub>6</sub>) δ 7.97 (d, *J* = 8.3 Hz, 1H), 7.81 (d, *J* = 1.9 Hz, 1H), 7.78-7.66 (m, 2H), 7.50 (dd, *J* = 7.6, 1.4 Hz, 1H), 7.44 (td, *J* = 7.5, 1.5 Hz, 1H), 7.34 (t, *J* = 7.5 Hz, 1H), 6.67 (d, *J* = 6.5 Hz, 1H), 5.10 (dd, *J* = 9.1, 5.8 Hz, 1H), 5.01 (d, *J* = 8.6 Hz, 1H), 4.05 (t, *J* = 8.9 Hz, 1H). <sup>13</sup>C NMR (100 MHz, DMSO-*d*<sub>6</sub>) δ 141.5, 139.1, 138.9, 136.9, 131.7, 131.3, 129.3, 127.9, 127.8, 127.6, 125.2, 123.5, 69.3, 68.1, 44.0; HRMS (ESI) Calcd. for C<sub>15</sub>H<sub>11</sub>ClNaO<sub>3</sub>S<sub>2</sub> [M+Na]<sup>+</sup>: 360.9370; found: 360.9373.

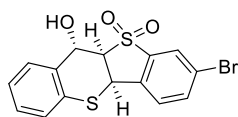

**(5aR,10aR,11S)-8-bromo-11-hydroxy-5a,10a-dihydro-11H-benzo[4,5]thieno[3,2-b]thiochromene 10,10-dioxide (5d):** white solid; 90% yield; 96% ee; >20:1 dr, [α]<sub>D</sub><sup>20</sup> = +158.5 (c 1.0, CH<sub>2</sub>Cl<sub>2</sub>); m.p.240.1-241.7 °C; The ee was determined by HPLC analysis using a Chiralpak AD-

H column (50/50 hexane/*i*-PrOH; flow rate: 1.0 mL/min; λ = 254 nm; *t*<sub>major</sub> = 18.92 min, *t*<sub>minor</sub> = 11.72 min); <sup>1</sup>H NMR (300 MHz, DMSO-*d*<sub>6</sub>) δ 8.23 (d, *J* = 1.9 Hz, 1H), 7.97 (dd, *J* = 8.3, 1.9 Hz, 1H), 7.68 (dd, *J* = 14.6, 7.9 Hz, 2H), 7.51 (dd, *J* = 7.5, 1.3 Hz, 1H), 7.44 (td, *J* = 7.5, 1.4 Hz, 1H), 7.34 (t, *J* = 7.4 Hz, 1H), 6.66 (d, *J* = 6.5 Hz, 1H), 5.10 (t, *J* = 7.8 Hz, 1H), 5.01 (d, *J* = 8.6 Hz, 1H), 4.05 (t, *J* = 8.9 Hz, 1H). <sup>13</sup>C NMR (100 MHz, DMSO-*d*<sub>6</sub>) δ 141.9, 141.4, 137.3, 133.7, 131.7, 130.0, 129.2, 127.7, 127.5, 125.1, 124.3, 123.5, 69.4, 68.0, 44.0; HRMS (ESI) Calcd. for C<sub>15</sub>H<sub>11</sub>BrNaO<sub>3</sub>S<sub>2</sub> [M+Na]<sup>+</sup>: 404.9225; found: 404.9213.

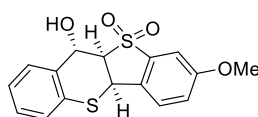

**(5aR,10aR,11S)-11-hydroxy-8-methoxy-5a,10a-dihydro-11H-benzo[4,5]thieno[3,2-b]thiochromene 10,10-dioxide (5e):** white solid; 99% yield; 96% ee; >20:1 dr, [α]<sub>D</sub><sup>20</sup> = +166.8 (c 1.0, CH<sub>2</sub>Cl<sub>2</sub>); m.p.224.5-

225.1 °C; The ee was determined by HPLC analysis using a Chiralpak AD-H column (50/50 hexane/*i*-PrOH; flow rate: 1.0 mL/min; λ = 254 nm; *t*<sub>major</sub> = 17.73 min, *t*<sub>minor</sub> = 12.66 min); <sup>1</sup>H NMR (300 MHz, DMSO-*d*<sub>6</sub>) δ 7.71 (d, *J* = 7.6 Hz, 1H), 7.58 (d, *J* = 8.6 Hz, 1H), 7.55-7.38 (m, 3H), 7.33 (dt, *J* = 8.7, 2.6 Hz, 2H), 6.59 (d, *J* = 4.7 Hz, 1H), 5.11 (t, *J* = 7.7 Hz, 1H), 4.94 (d, *J* = 8.6 Hz, 1H), 4.01 (t, *J* = 8.8 Hz, 1H), 3.88 (s, 3H). <sup>13</sup>C NMR (75 MHz, DMSO-*d*<sub>6</sub>) δ 161.0, 141.6, 141.3, 132.0, 129.2, 128.9, 127.5, 127.4, 126.1, 125.0, 122.3, 104.3, 69.8, 68.2, 56.2, 44.0; HRMS (ESI) Calcd. for C<sub>16</sub>H<sub>14</sub>NaO<sub>4</sub>S<sub>2</sub> [M+Na]<sup>+</sup>: 357.0226; found: 357.0231.

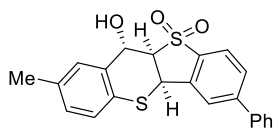

**(5aR,10aR,11S)-11-hydroxy-2-methyl-7-phenyl-5a,10a-dihydro-11H-benzo[4,5]thieno[3,2-b]thiochromene 10,10-dioxide (5f):** white solid; 89% yield; 98% ee; >20:1 dr, [α]<sub>D</sub><sup>20</sup> = +121.1 (c 1.0, CH<sub>2</sub>Cl<sub>2</sub>); m.p.202.3-203.1 °C; The ee was determined by HPLC analysis using a

Chiralpak OD-H column (50/50 hexane/*i*-PrOH; flow rate: 1.0 mL/min; λ = 254 nm; *t*<sub>major</sub> = 16.13 min, *t*<sub>minor</sub> = 5.85 min); <sup>1</sup>H NMR (300 MHz, DMSO-*d*<sub>6</sub>) δ 8.04-7.86 (m, 3H), 7.76 (d, *J* = 7.2 Hz, 2H), 7.52 (m, 4H), 7.39 (d, *J* = 7.7 Hz, 1H), 7.15 (d, *J* = 7.8 Hz, 1H), 6.59 (s, 1H), 5.12 (d, *J* = 9.1 Hz, 1H), 5.03 (d, *J* = 8.6 Hz, 1H), 4.02 (t, *J* = 8.8 Hz, 1H), 2.38 (s, 3H). <sup>13</sup>C NMR (100 MHz,

DMSO-*d*<sub>6</sub>)  $\delta$  146.0, 141.5, 138.9, 138.2, 137.2, 135.5, 129.4, 129.3, 129.1, 128.9, 128.5, 128.0, 127.3, 125.8, 125.7, 122.1, 99.6, 69.2, 68.1, 44.6, 21.2; HRMS (ESI) Calcd. for C<sub>22</sub>H<sub>18</sub>NaO<sub>3</sub>S<sub>2</sub> [M+Na]<sup>+</sup>: 417.0590; found: 417.0588.

## 7. Scale-up Experiment

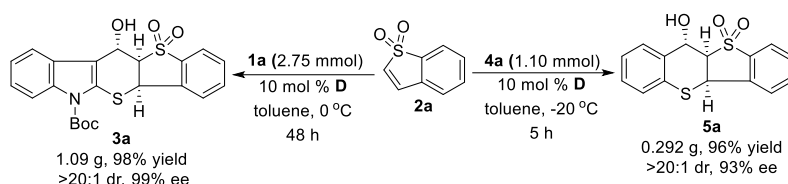

To a reaction tube were added the 3-formyl-2-mercapto-indole **1a** (2.5 mmol, 1.0 equiv.), the benzo[*b*]thiophene 1,1-dioxide **2a** (2.75 mmol, 1.1 equiv.), catalyst **D** (0.25 mmol) and toluene (12.5 mL). The reaction mixture was stirred at 0 °C for 48 h. the reaction mixture was directly purified by flash chromatography on silica gel (petroleum ether/ethyl acetate = 4:1) to afford the desired product **3a** (1.087 g, 98% yield, >20:1 dr and 99% ee).

To a reaction tube were added the 2-mercaptobenzaldehyde **4a** (1.1 mmol, 1.0 equiv.), benzo[*b*]thiophene 1,1-dioxide **2a** (1 mmol, 1.1 equiv.), catalyst **D** (0.1 mmol) and toluene (5 mL). The reaction mixture was stirred at -20 °C for 5 h. the reaction mixture was directly purified by flash chromatography on silica gel (petroleum ether/ethyl acetate = 3:1) to afford the desired product **5a** (0.292 g, 96% yield, >20:1 dr and 93% ee).

## 8. General experimental procedures for in vitro cytotoxicity assay

Human leukemia cells K562 were purchased from Chinese Academy of Sciences, Kunming Cell Bank and Chinese Academy of Sciences, Shanghai Cell Bank respectively. The cells were cultured in RPMI-1640 medium (GIBICO, USA), supplemented with 10% fetal bovine serum (Hyclone, USA) and Penicillin-Streptomycin (respectively 100 U/mL) in 5% CO<sub>2</sub> at 37 °C. The cytotoxicity assay was performed according to the MTT method in 96-well microplates. Briefly, 5000 cells were seeded into each well of 96-well cell culture plates and allowed to grow for 24 h before the drug is added. The K562 tumor cell line was exposed to compounds (**3a**, **3d**, **3e**, **3g**, **3h**, **3i**, **3j**, **3l**, **3o**, **3q**, **3r** and **3t**) at the concentrations of 1, 2, 4, 8 and 20  $\mu\text{mol}\cdot\text{L}^{-1}$  in triplicates for 48 h, comparable to cisplatin (Aladdin, China). Then the MTT reagent was added to reaction with the cancer cells for 4 hours. At least, measure the OD value at 490 wavelengths. The average 50% inhibitory concentration (IC<sub>50</sub>) of all the compounds is calculated by IBM SPSS Statistics (version 19). Each concentration was analyzed in triplicate at least, and the whole experiment was repeated three times.

**Table 1. Cell inhibitory assay of target products in human leukemia cells K562**

| Compound  | IC <sub>50</sub> (uM) | Compound  | IC <sub>50</sub> (uM) | Compound  | IC <sub>50</sub> (uM) |
|-----------|-----------------------|-----------|-----------------------|-----------|-----------------------|
| <b>3a</b> | 20.31                 | <b>3h</b> | 20.95                 | <b>3o</b> | 21.71                 |
| <b>3d</b> | 10.31                 | <b>3i</b> | 12.04                 | <b>3q</b> | 33.31                 |
| <b>3e</b> | 24.94                 | <b>3j</b> | 34.06                 | <b>3r</b> | 31.35                 |
| <b>3g</b> | 17.08                 | <b>3l</b> | 20.10                 | <b>3t</b> | 32.65                 |

<sup>a</sup>IC<sub>50</sub> is the concentration of a compound that affords a 50% reduction in cell growth (after 48 h of incubation), expressed as the mean of triplicate experiments. <sup>b</sup>Commercially available broad-spectrum anticancer drug cisplatin as a positive control (IC<sub>50</sub> = 21.863  $\mu\text{M}$ ).

## 9. X-ray crystal structure of 3a and 5a.

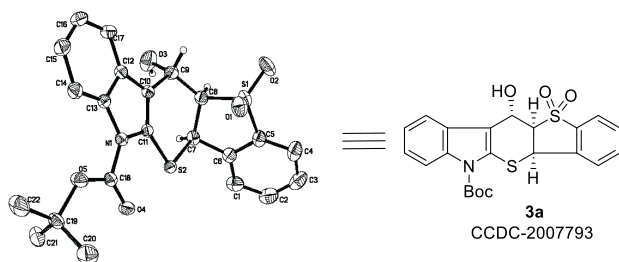

### Crystal data and structure refinement for 3a

|                                             |                                                                |
|---------------------------------------------|----------------------------------------------------------------|
| Identification code                         | <b>3a</b>                                                      |
| Empirical formula                           | C <sub>22</sub> H <sub>21</sub> NO <sub>5</sub> S <sub>2</sub> |
| Formula weight                              | 443.52                                                         |
| Temperature/K                               | 293(2)                                                         |
| Crystal system                              | orthorhombic                                                   |
| Space group                                 | P2 <sub>1</sub> 2 <sub>1</sub> 2 <sub>1</sub>                  |
| a/Å                                         | 8.71695(13)                                                    |
| b/Å                                         | 13.36161(18)                                                   |
| c/Å                                         | 17.6913(2)                                                     |
| α/°                                         | 90                                                             |
| β/°                                         | 90                                                             |
| γ/°                                         | 90                                                             |
| Volume/Å <sup>3</sup>                       | 2060.55(5)                                                     |
| Z                                           | 4                                                              |
| ρ <sub>calc</sub> /cm <sup>3</sup>          | 1.430                                                          |
| μ/mm <sup>-1</sup>                          | 2.645                                                          |
| F(000)                                      | 928.0                                                          |
| Crystal size/mm <sup>3</sup>                | 0.15 × 0.13 × 0.1                                              |
| Radiation                                   | CuKα (λ = 1.54184)                                             |
| 2θ range for data collection/°              | 8.292 to 142.13                                                |
| Index ranges                                | -10 ≤ h ≤ 10, -16 ≤ k ≤ 16, -21 ≤ l ≤ 21                       |
| Reflections collected                       | 19546                                                          |
| Independent reflections                     | 3953 [R <sub>int</sub> = 0.0413, R <sub>sigma</sub> = 0.0272]  |
| Data/restraints/parameters                  | 3953/0/274                                                     |
| Goodness-of-fit on F <sup>2</sup>           | 1.090                                                          |
| Final R indexes [I ≥ 2σ (I)]                | R <sub>1</sub> = 0.0368, wR <sub>2</sub> = 0.0982              |
| Final R indexes [all data]                  | R <sub>1</sub> = 0.0377, wR <sub>2</sub> = 0.0996              |
| Largest diff. peak/hole / e Å <sup>-3</sup> | 0.47/-0.24                                                     |
| Flack parameter                             | 0.013(9)                                                       |

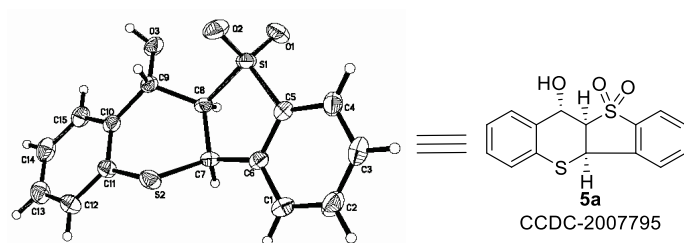

### Crystal data and structure refinement for 5a

|                                             |                                                               |
|---------------------------------------------|---------------------------------------------------------------|
| Identification code                         | <b>5a</b>                                                     |
| Empirical formula                           | C <sub>15</sub> H <sub>12</sub> O <sub>3</sub> S <sub>2</sub> |
| Formula weight                              | 304.37                                                        |
| Temperature/K                               | 293(2)                                                        |
| Crystal system                              | orthorhombic                                                  |
| Space group                                 | P2 <sub>1</sub> 2 <sub>1</sub> 2 <sub>1</sub>                 |
| a/Å                                         | 7.8266(4)                                                     |
| b/Å                                         | 13.1360(6)                                                    |
| c/Å                                         | 13.1894(5)                                                    |
| α/°                                         | 90                                                            |
| β/°                                         | 90                                                            |
| γ/°                                         | 90                                                            |
| Volume/Å <sup>3</sup>                       | 1356.00(10)                                                   |
| Z                                           | 4                                                             |
| ρ <sub>calc</sub> /g/cm <sup>3</sup>        | 1.491                                                         |
| μ/mm <sup>-1</sup>                          | 3.601                                                         |
| F(000)                                      | 632.0                                                         |
| Crystal size/mm <sup>3</sup>                | 0.2 × 0.16 × 0.1                                              |
| Radiation                                   | CuKα (λ = 1.54184)                                            |
| 2θ range for data collection/°              | 9.502 to 134.12                                               |
| Index ranges                                | -5 ≤ h ≤ 9, -13 ≤ k ≤ 15, -14 ≤ l ≤ 15                        |
| Reflections collected                       | 4921                                                          |
| Independent reflections                     | 2433 [R <sub>int</sub> = 0.0297, R <sub>sigma</sub> = 0.0426] |
| Data/restraints/parameters                  | 2433/0/182                                                    |
| Goodness-of-fit on F <sup>2</sup>           | 1.063                                                         |
| Final R indexes [I ≥ 2σ (I)]                | R <sub>1</sub> = 0.0399, wR <sub>2</sub> = 0.0977             |
| Final R indexes [all data]                  | R <sub>1</sub> = 0.0451, wR <sub>2</sub> = 0.1030             |
| Largest diff. peak/hole / e Å <sup>-3</sup> | 0.23/-0.29                                                    |
| Flack parameter                             | -0.010(15)                                                    |

### 10. Proposed transition state for the enantioselective tandem reaction

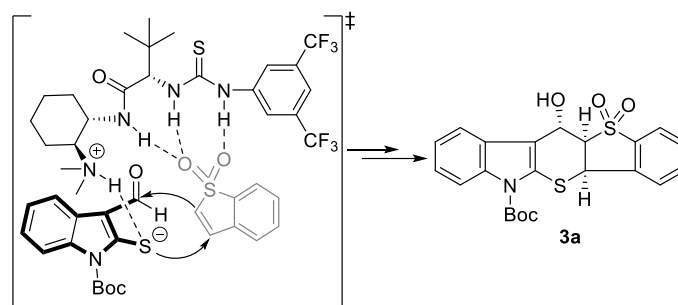

# 11. <sup>1</sup>H, <sup>13</sup>C NMR, spectra for catalysts C and D

<sup>1</sup>H and <sup>13</sup>C NMR of catalyst C

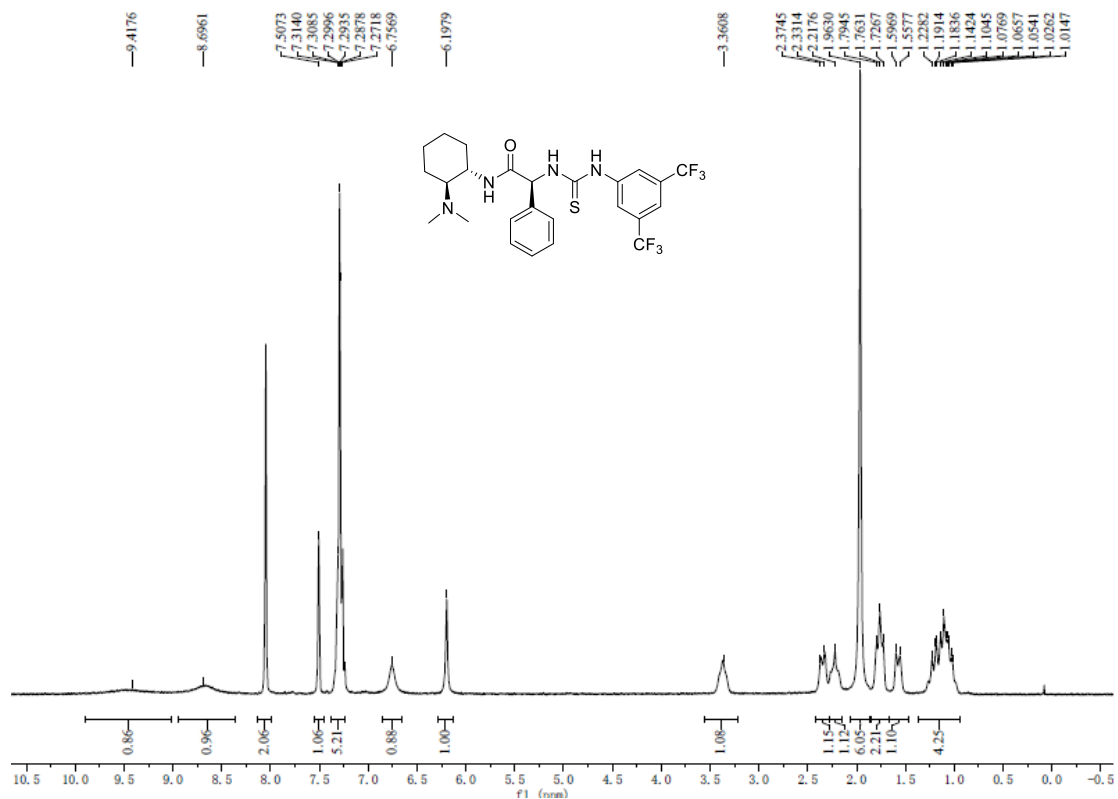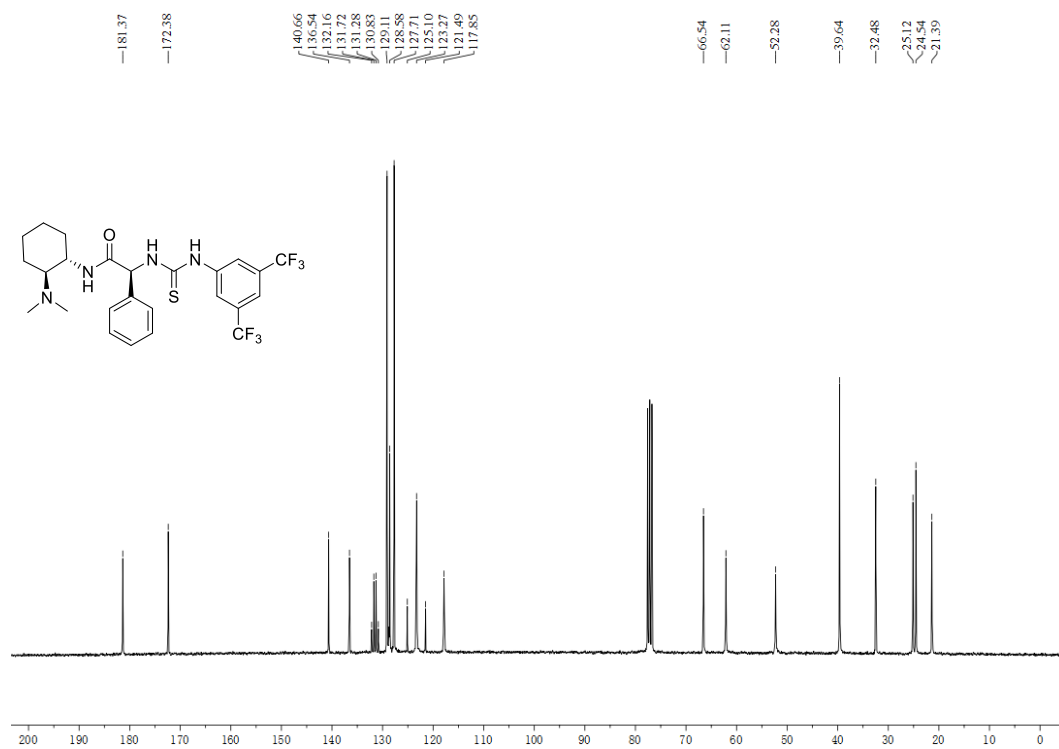

<sup>1</sup>H and <sup>13</sup>C NMR of catalyst D

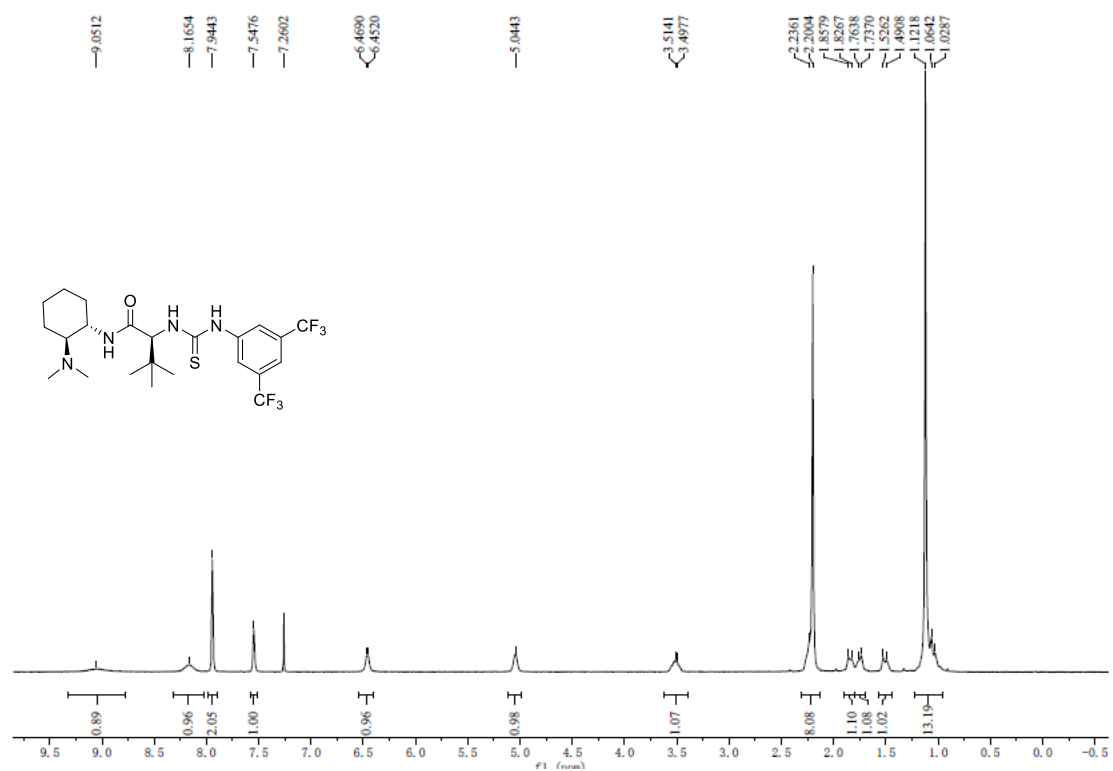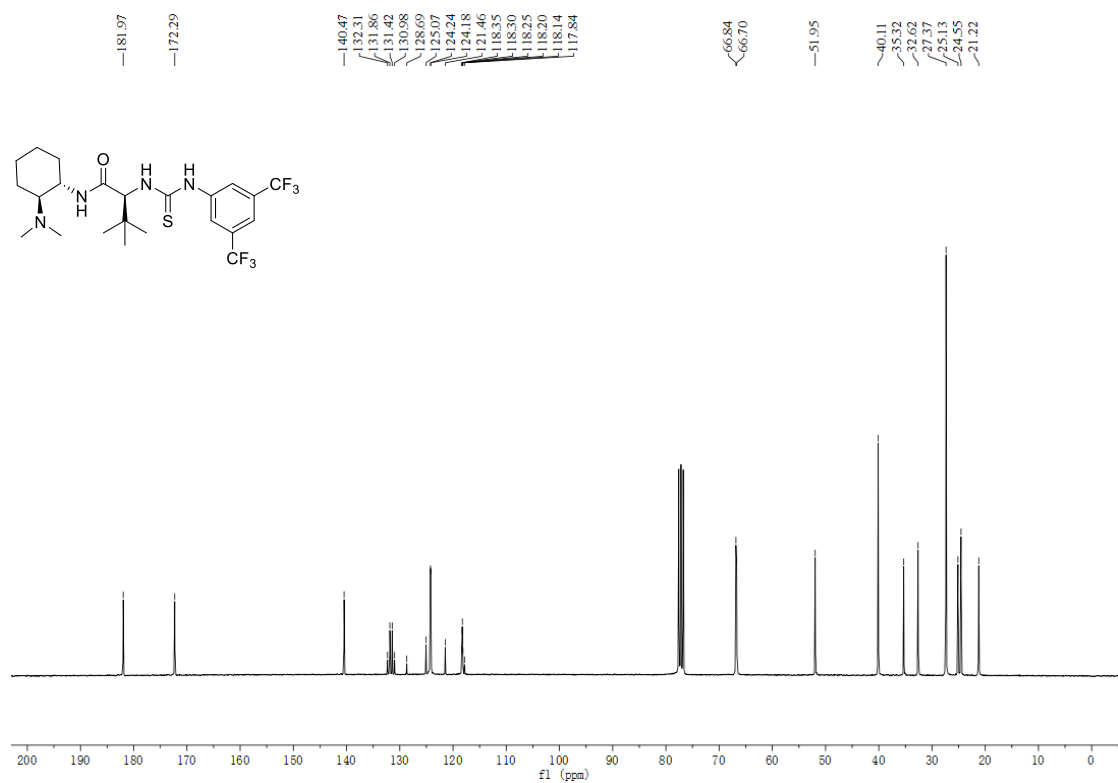



## 12. $^1\text{H}$ , $^{13}\text{C}$ NMR, and HPLC spectra for compounds 3a-y, and compounds 5a-g

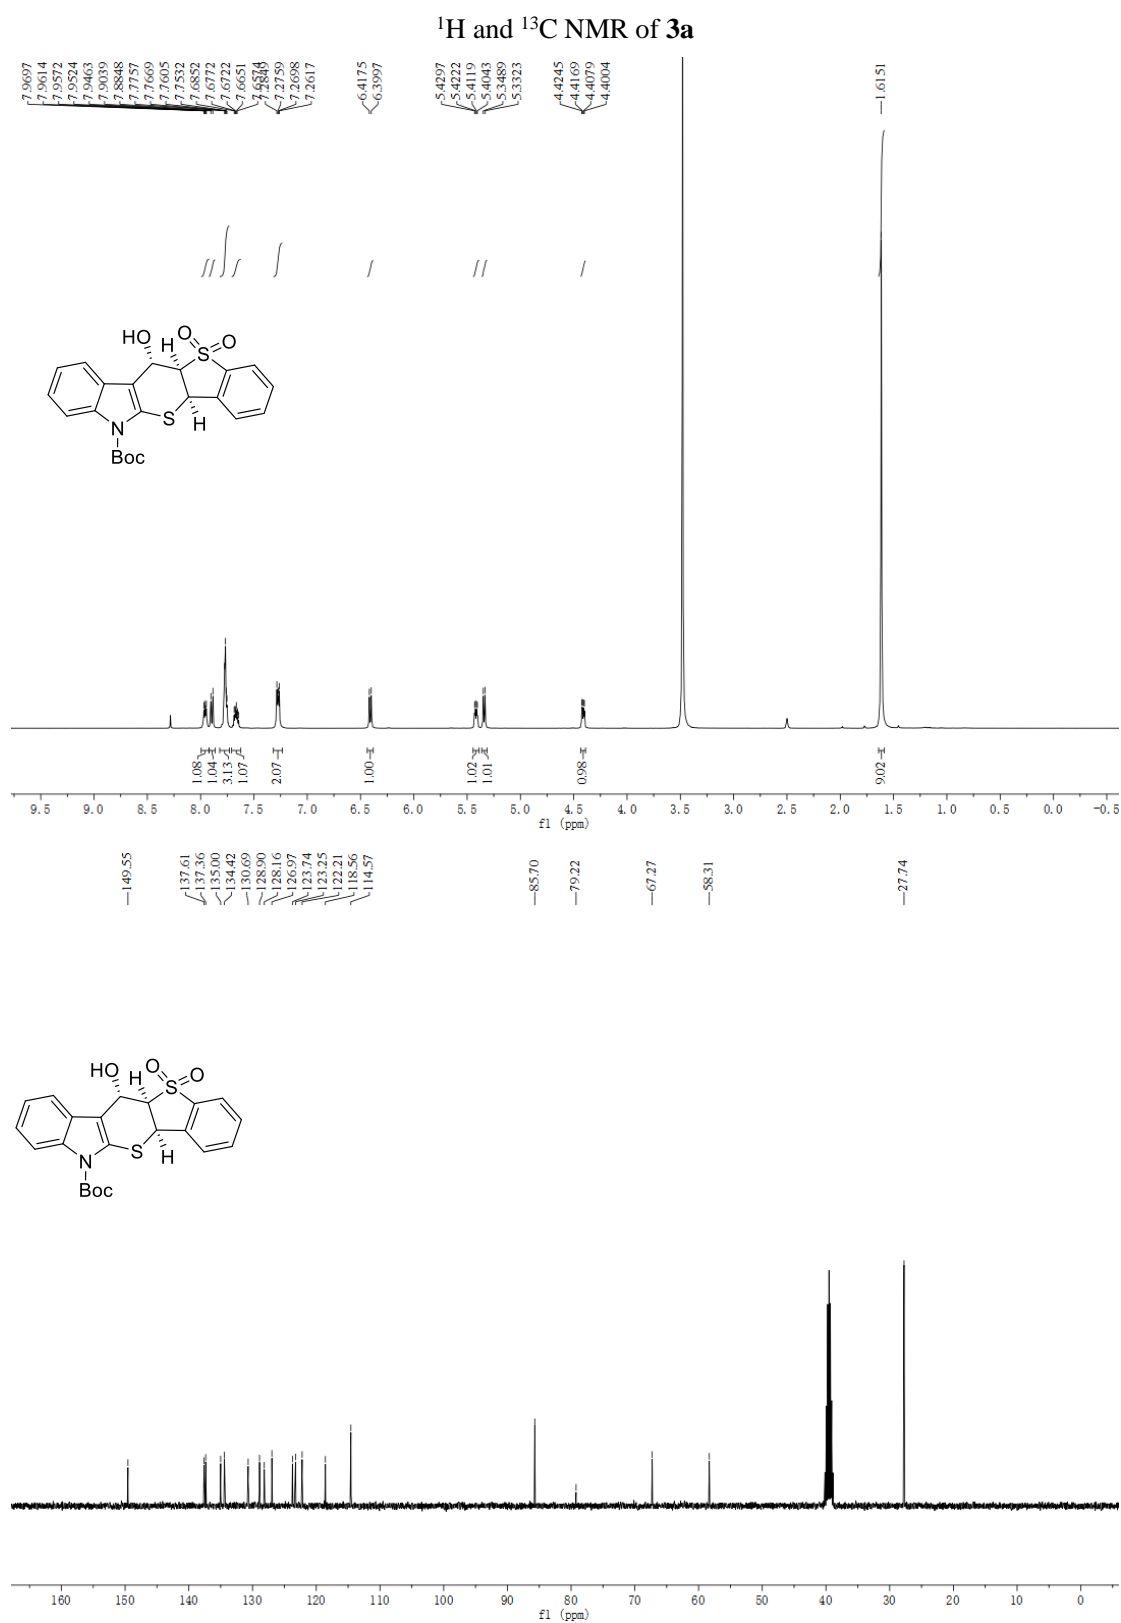

### HPLC of 3a

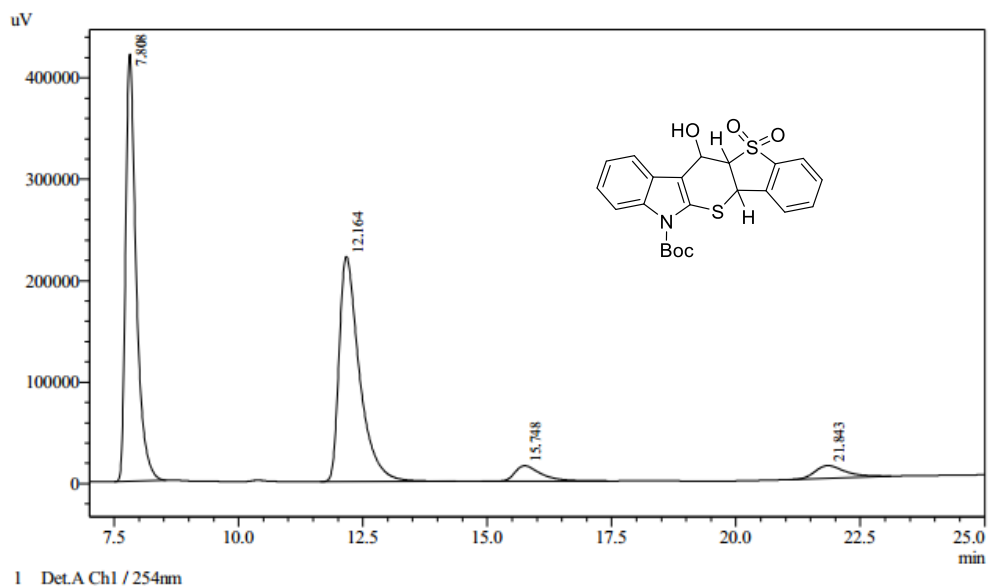

Detector A Ch1 254nm

| Peak# | Ret. Time | Area     | Height | Area %  | Height % |
|-------|-----------|----------|--------|---------|----------|
| 1     | 7.808     | 6245443  | 421037 | 45.826  | 62.785   |
| 2     | 12.164    | 6304549  | 221966 | 46.260  | 33.099   |
| 3     | 15.748    | 552266   | 15165  | 4.052   | 2.261    |
| 4     | 21.843    | 526261   | 12437  | 3.861   | 1.855    |
| Total |           | 13628519 | 670605 | 100.000 | 100.000  |

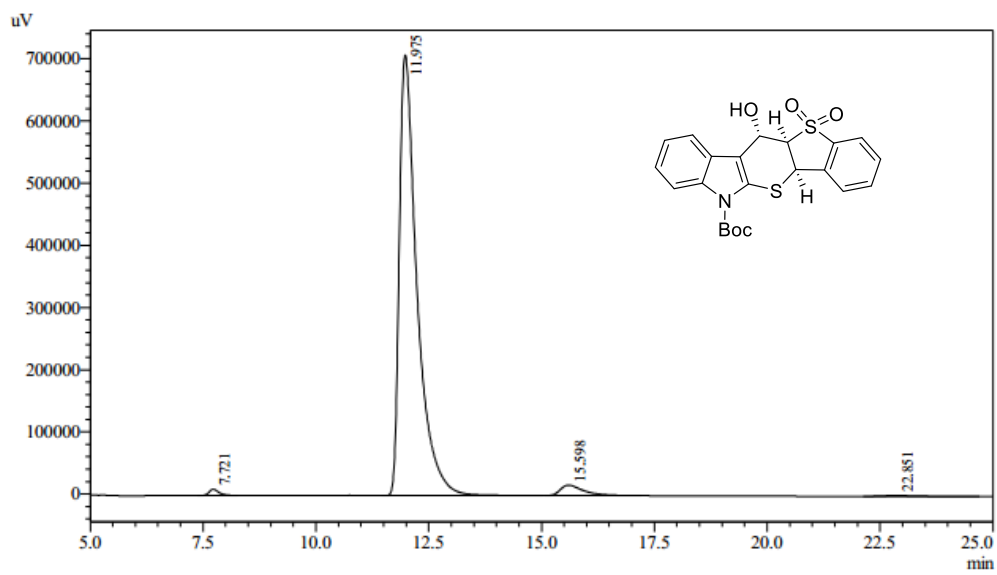

Detector A Ch1 254nm

| Peak# | Ret. Time | Area     | Height | Area %  | Height % |
|-------|-----------|----------|--------|---------|----------|
| 1     | 7.721     | 148335   | 10060  | 0.735   | 1.365    |
| 2     | 11.975    | 19364251 | 708622 | 95.931  | 96.154   |
| 3     | 15.598    | 608150   | 16862  | 3.013   | 2.288    |
| 4     | 22.851    | 64962    | 1422   | 0.322   | 0.193    |
| Total |           | 20185697 | 736966 | 100.000 | 100.000  |

<sup>1</sup>H and <sup>13</sup>C NMR of **3b**

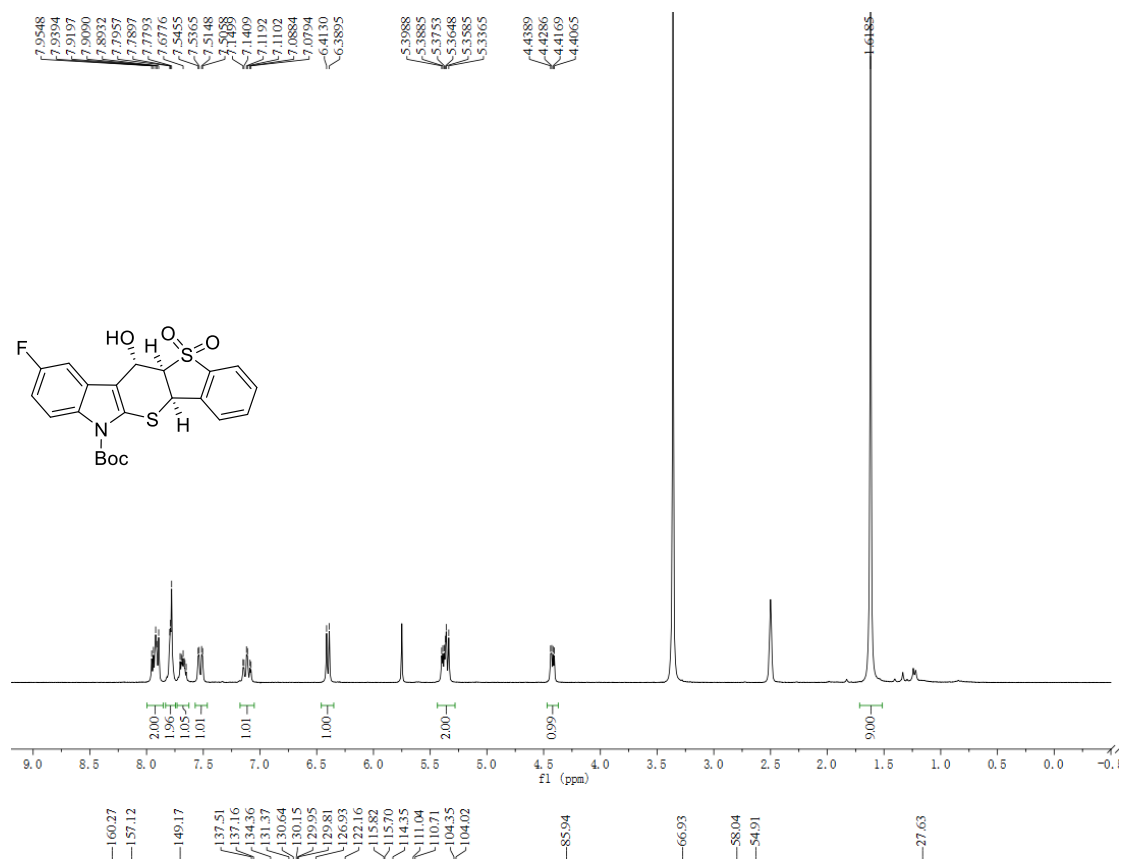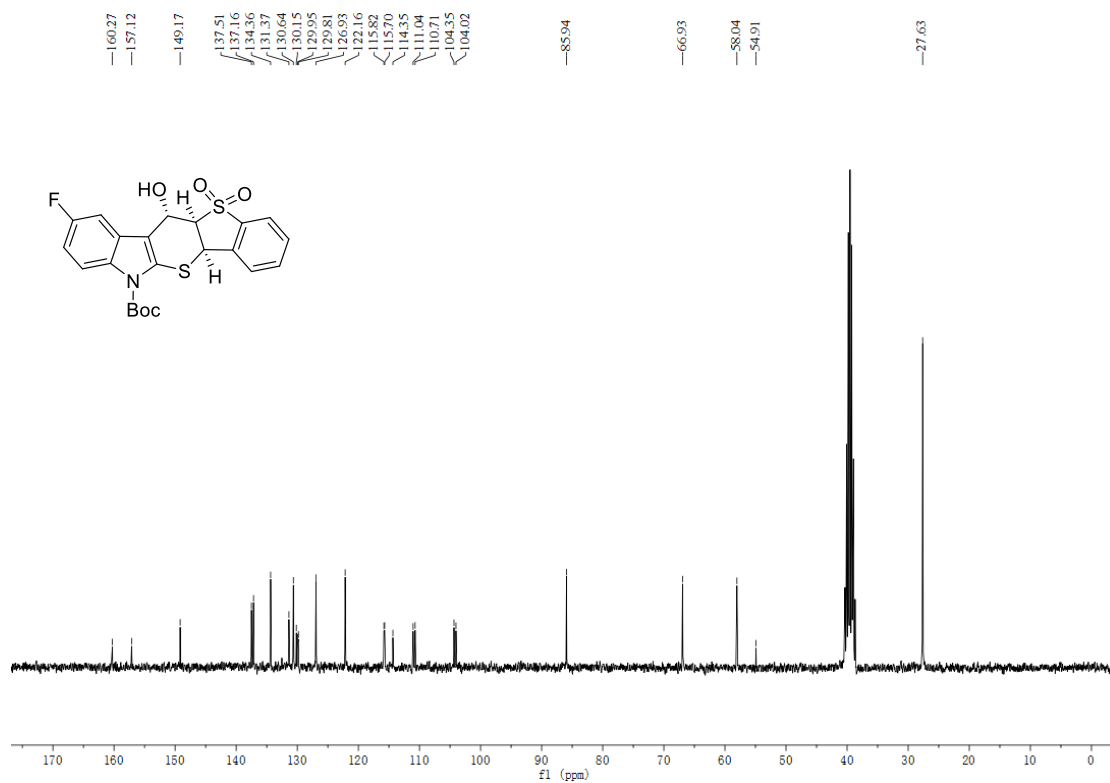

### HPLC of 3b

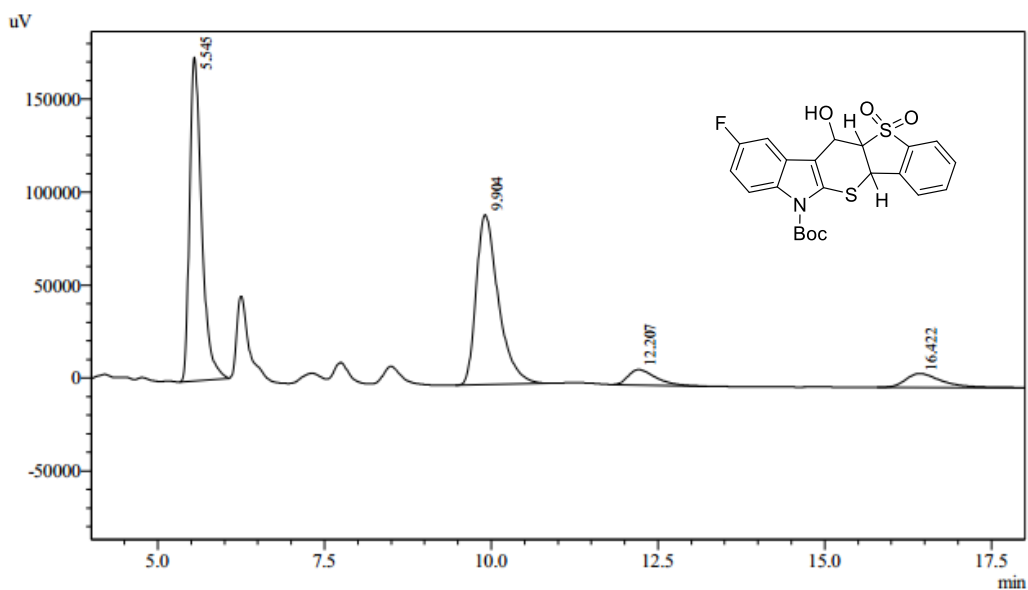

Detector A Ch1 254nm

| Peak# | Ret. Time | Area    | Height | Area %  | Height % |
|-------|-----------|---------|--------|---------|----------|
| 1     | 5.545     | 2183743 | 174147 | 45.238  | 61.899   |
| 2     | 9.904     | 2126927 | 91459  | 44.061  | 32.508   |
| 3     | 12.207    | 239232  | 8263   | 4.956   | 2.937    |
| 4     | 16.422    | 277290  | 7472   | 5.744   | 2.656    |
| Total |           | 4827192 | 281341 | 100.000 | 100.000  |

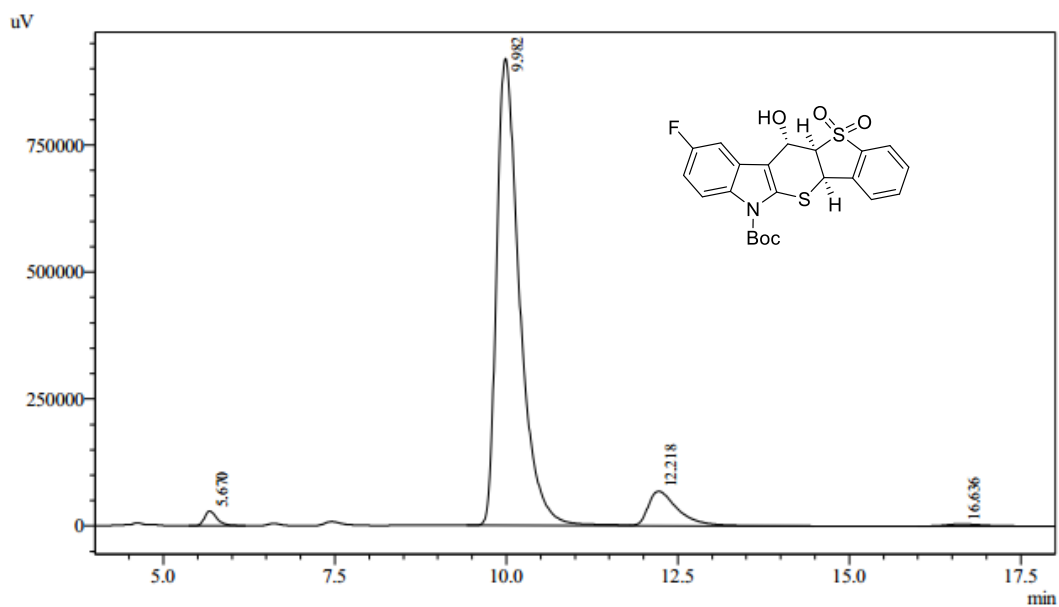

Detector A Ch1 254nm

| Peak# | Ret. Time | Area     | Height  | Area %  | Height % |
|-------|-----------|----------|---------|---------|----------|
| 1     | 5.670     | 364314   | 28767   | 1.523   | 2.820    |
| 2     | 9.982     | 21368667 | 919304  | 89.326  | 90.132   |
| 3     | 12.218    | 2039181  | 67818   | 8.524   | 6.649    |
| 4     | 16.636    | 149871   | 4067    | 0.626   | 0.399    |
| Total |           | 23922034 | 1019956 | 100.000 | 100.000  |

# $^1\text{H}$ and $^{13}\text{C}$ NMR of **3c**

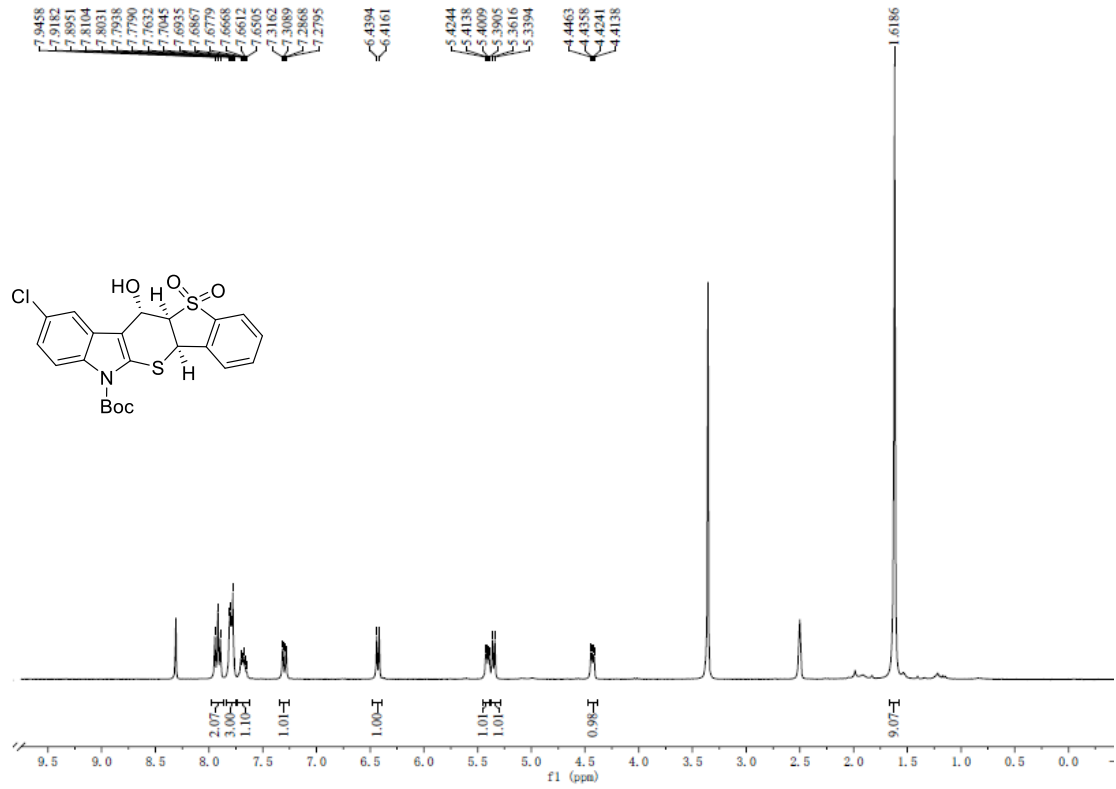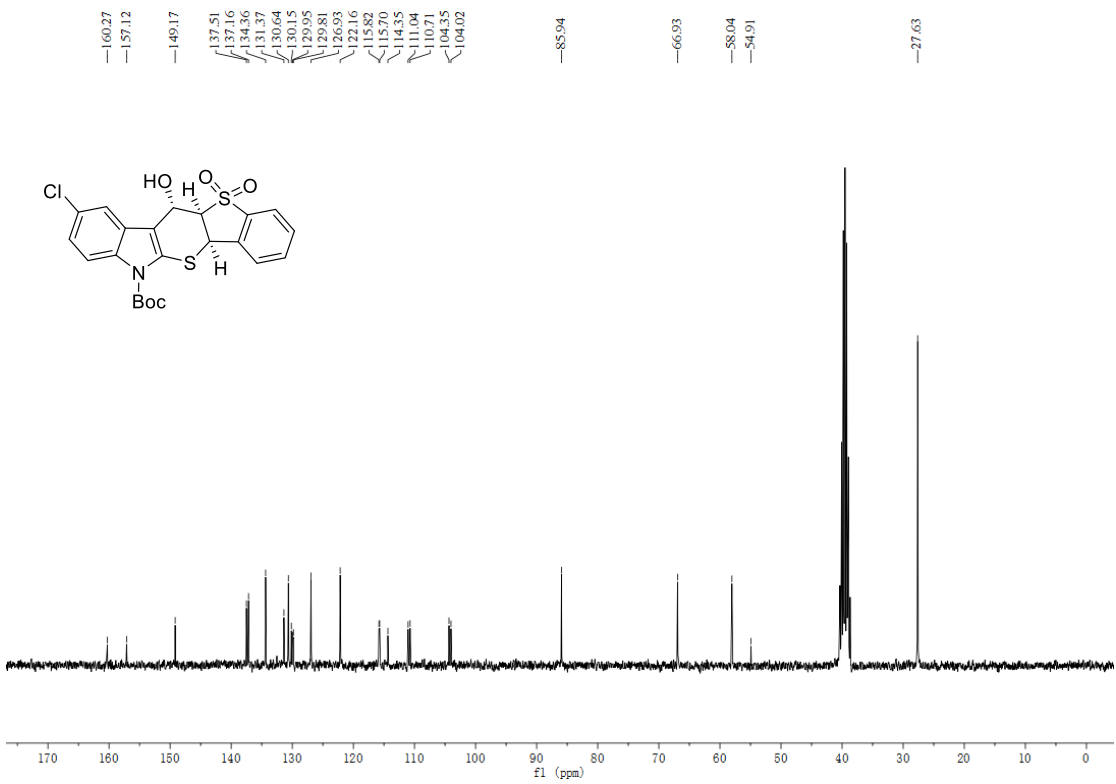

### HPLC of 3c

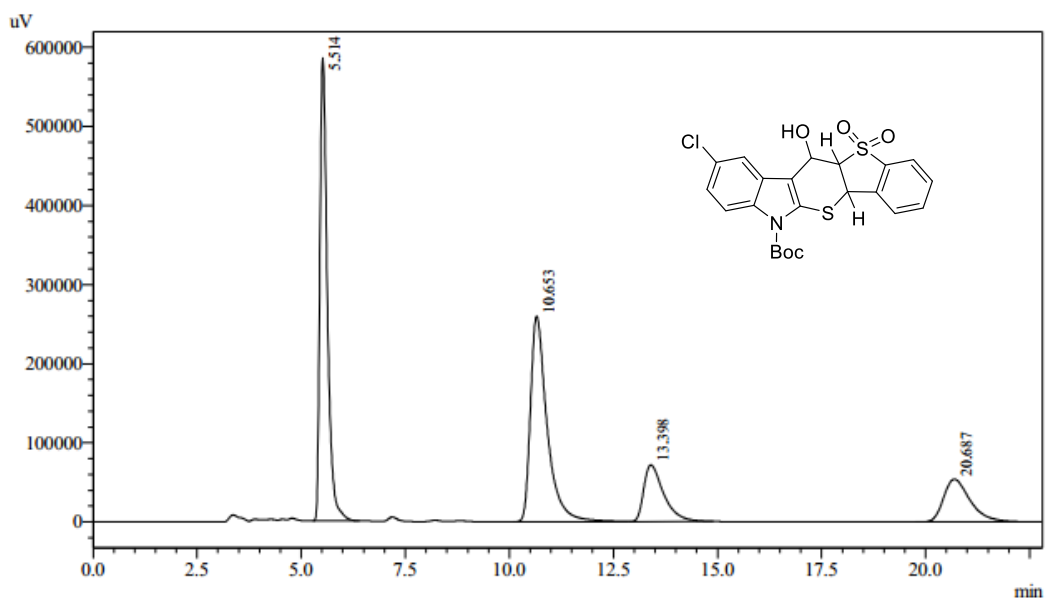

Detector A Ch1 254nm

| Peak# | Ret. Time | Area     | Height | Area %  | Height % |
|-------|-----------|----------|--------|---------|----------|
| 1     | 5.514     | 7296270  | 585529 | 37.727  | 60.295   |
| 2     | 10.653    | 7237856  | 259759 | 37.425  | 26.749   |
| 3     | 13.398    | 2385541  | 71738  | 12.335  | 7.387    |
| 4     | 20.687    | 2419956  | 54082  | 12.513  | 5.569    |
| Total |           | 19339623 | 971108 | 100.000 | 100.000  |

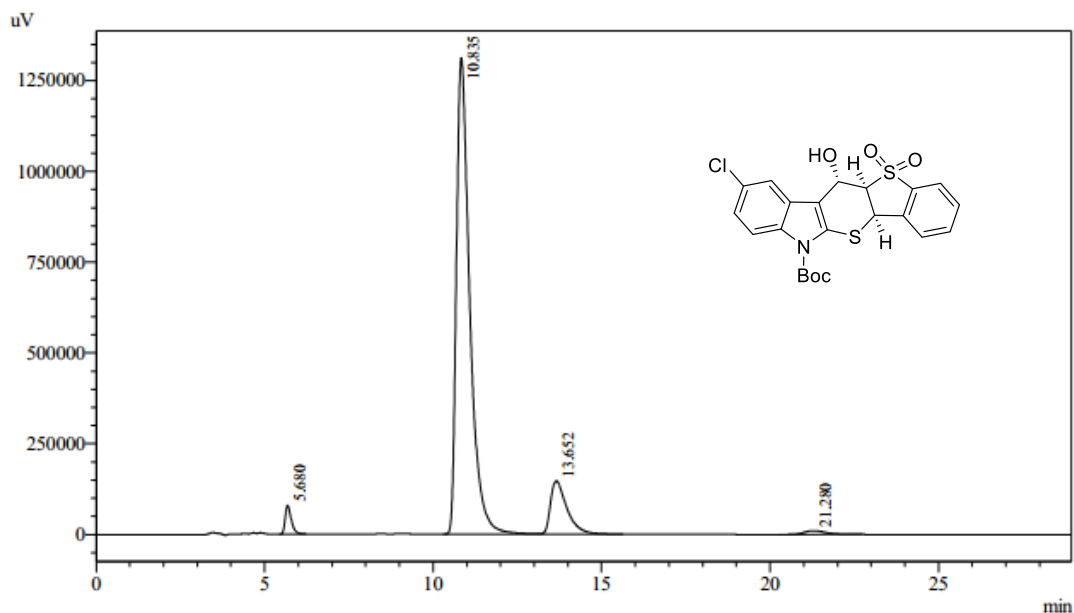

Detector A Ch1 254nm

| Peak# | Ret. Time | Area     | Height  | Area %  | Height % |
|-------|-----------|----------|---------|---------|----------|
| 1     | 5.680     | 1005362  | 79055   | 2.362   | 5.105    |
| 2     | 10.835    | 36101435 | 1312180 | 84.818  | 84.741   |
| 3     | 13.652    | 4981935  | 146713  | 11.705  | 9.475    |
| 4     | 21.280    | 474468   | 10501   | 1.115   | 0.678    |
| Total |           | 42563199 | 1548450 | 100.000 | 100.000  |

<sup>1</sup>H and <sup>13</sup>C NMR of **3d**

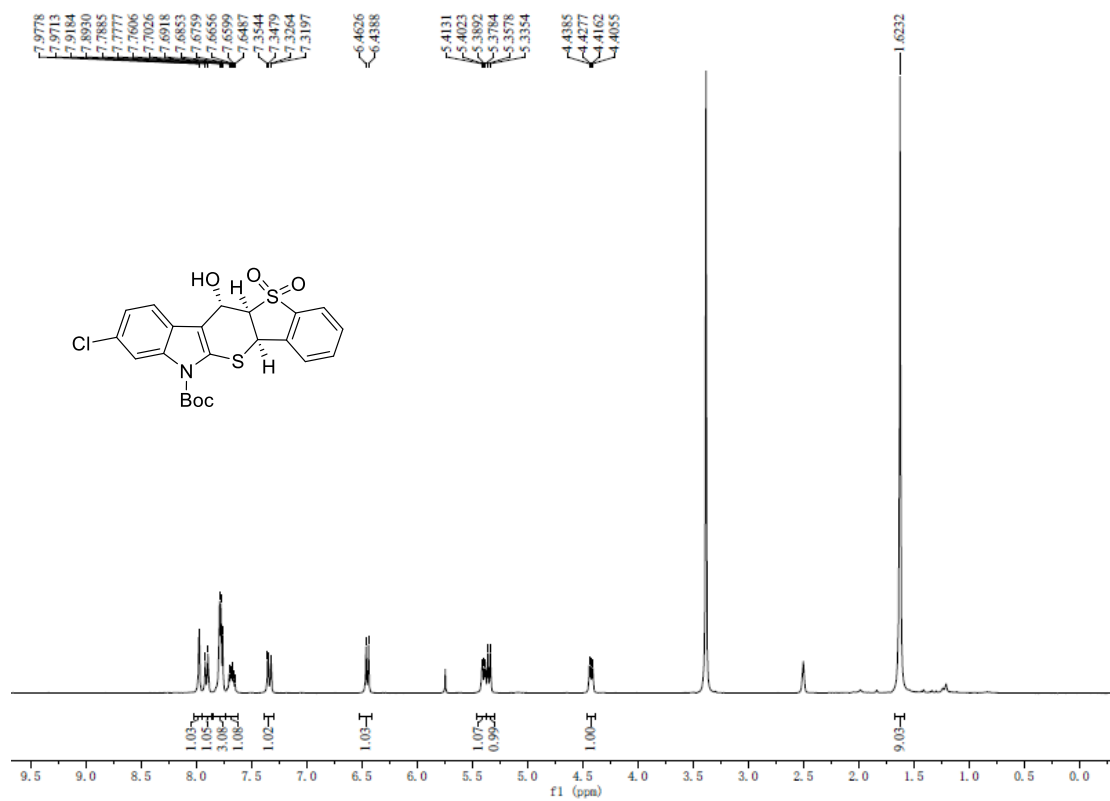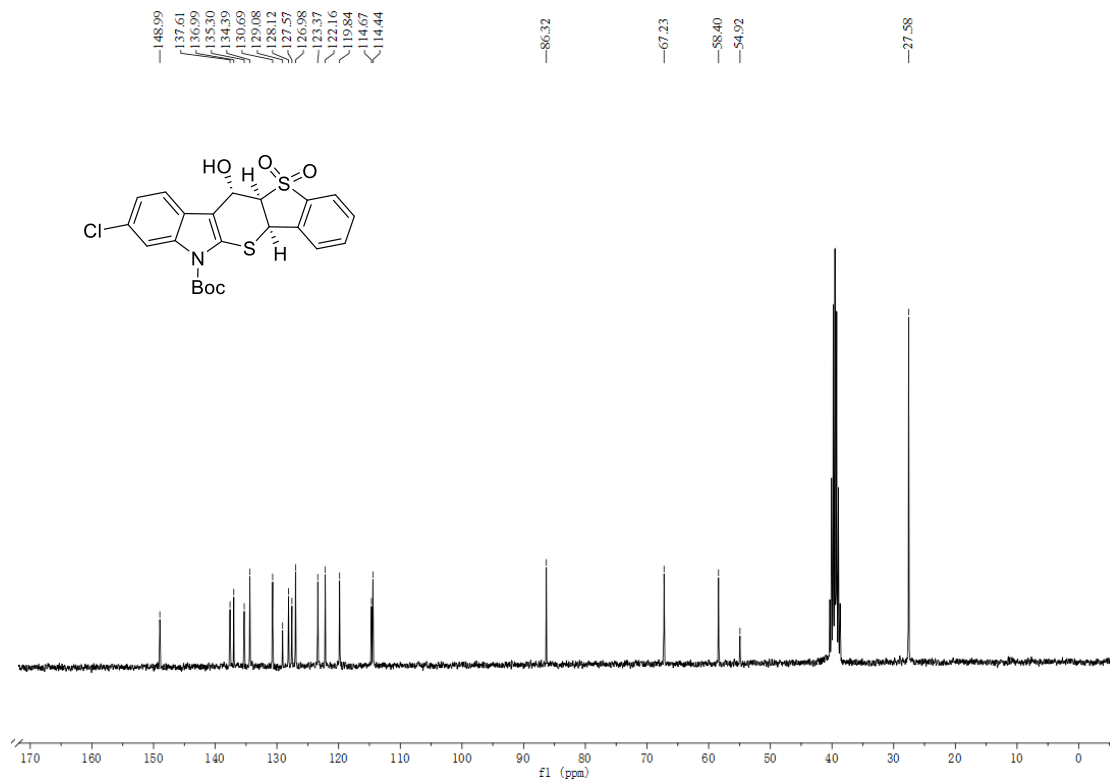

### HPLC of 3d

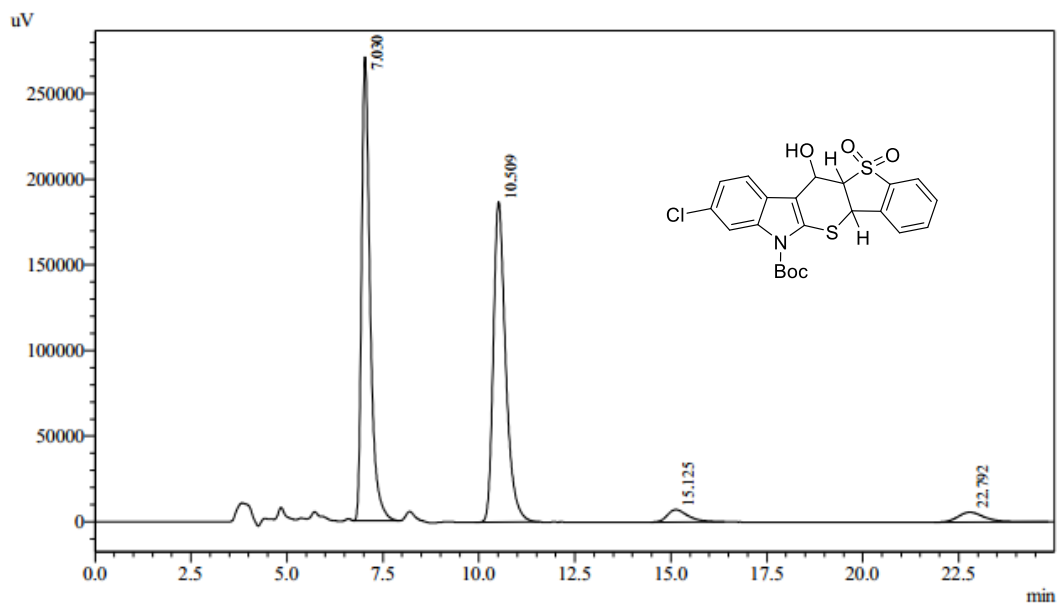

1 Det.A Ch1 / 254nm

Detector A Ch1 254nm

| Peak# | Ret. Time | Area    | Height | Area %  | Height % |
|-------|-----------|---------|--------|---------|----------|
| 1     | 7.030     | 4201131 | 270838 | 47.000  | 57.534   |
| 2     | 10.509    | 4193244 | 186914 | 46.912  | 39.706   |
| 3     | 15.125    | 271707  | 7236   | 3.040   | 1.537    |
| 4     | 22.792    | 272434  | 5757   | 3.048   | 1.223    |
| Total |           | 8938516 | 470744 | 100.000 | 100.000  |

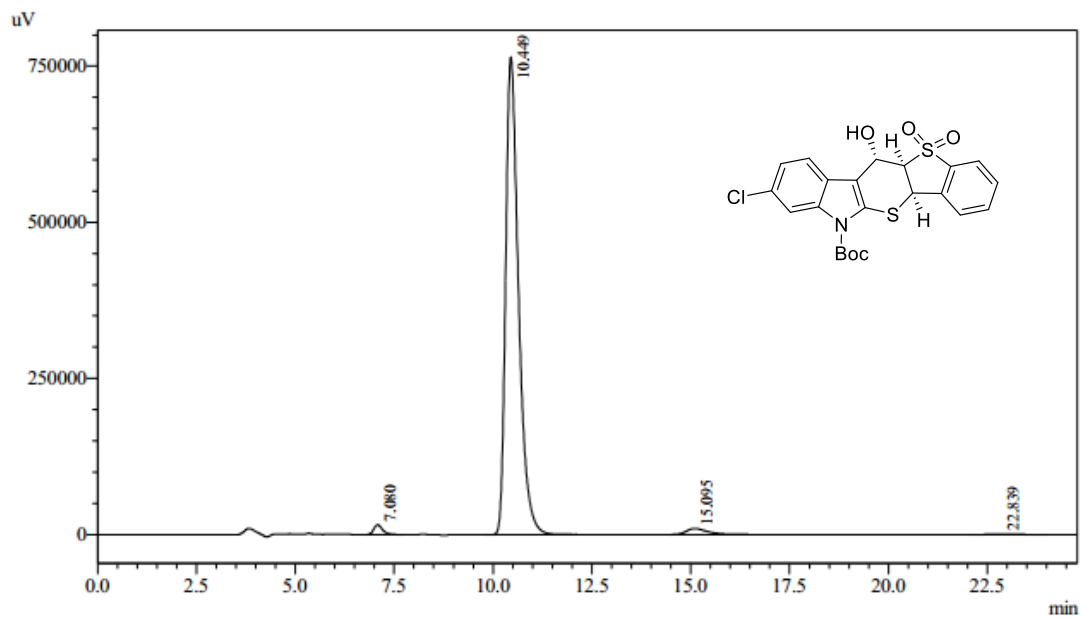

1 Det.A Ch1 / 254nm

Detector A Ch1 254nm

| Peak# | Ret. Time | Area     | Height | Area %  | Height % |
|-------|-----------|----------|--------|---------|----------|
| 1     | 7.080     | 249509   | 15774  | 1.397   | 1.995    |
| 2     | 10.449    | 17216978 | 764683 | 96.413  | 96.709   |
| 3     | 15.095    | 360507   | 9558   | 2.019   | 1.209    |
| 4     | 22.839    | 30575    | 687    | 0.171   | 0.087    |
| Total |           | 17857569 | 790701 | 100.000 | 100.000  |



<sup>1</sup>H and <sup>13</sup>C NMR of **3e**

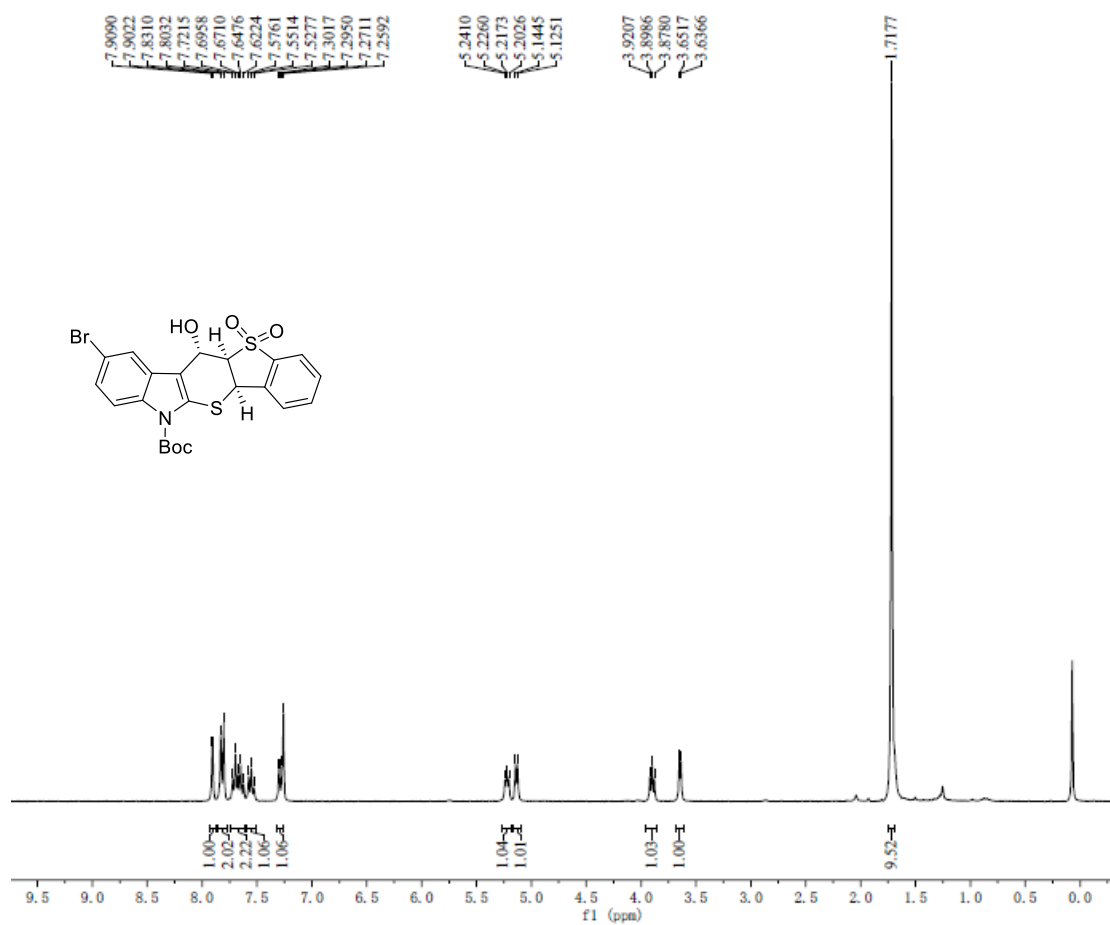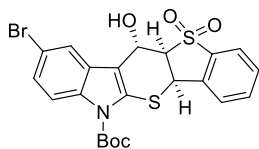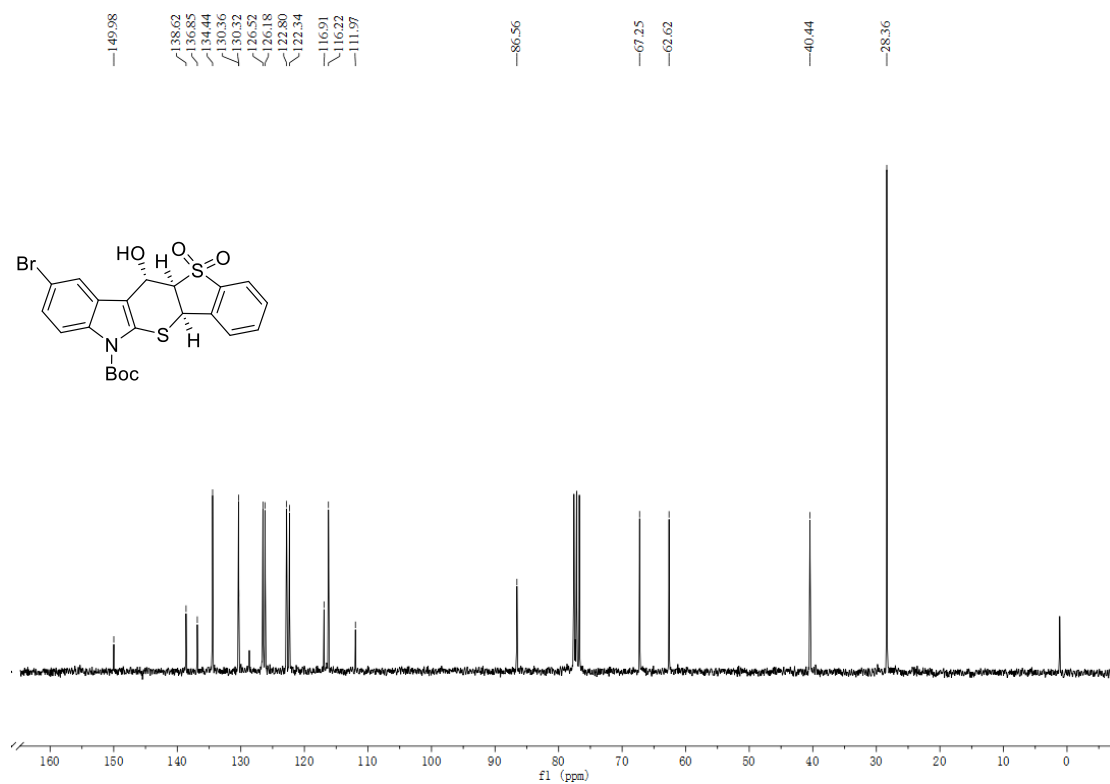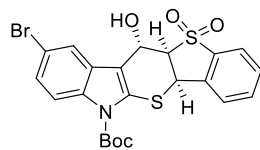

### HPLC of 3e

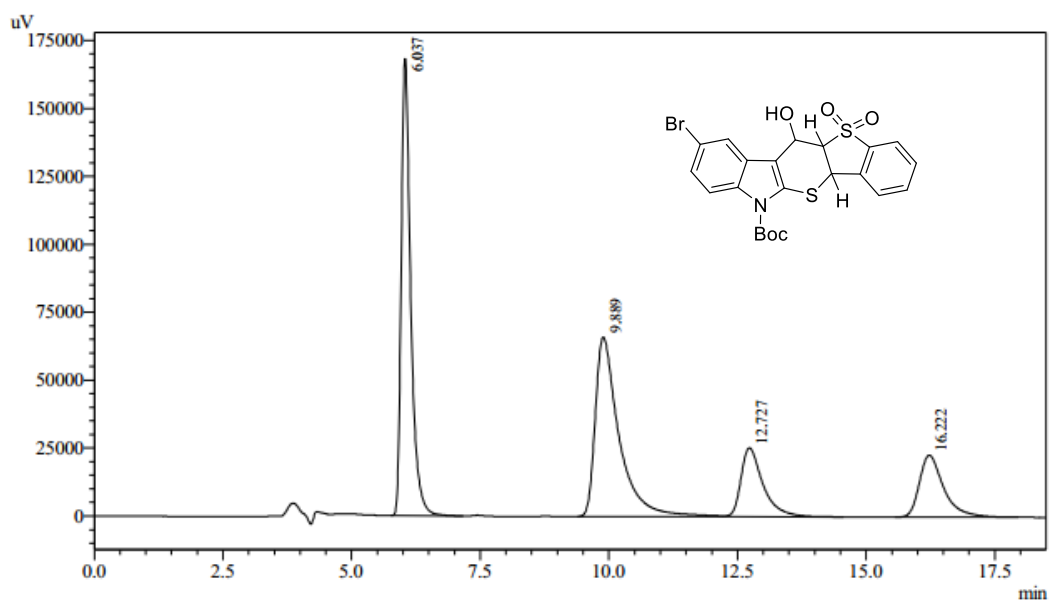

1 Det.A Ch1 / 254nm

Detector A Ch1 254nm

| Peak# | Ret. Time | Area    | Height | Area %  | Height % |
|-------|-----------|---------|--------|---------|----------|
| 1     | 6.037     | 2157799 | 168164 | 37.253  | 59.577   |
| 2     | 9.889     | 2128333 | 65990  | 36.744  | 23.379   |
| 3     | 12.727    | 756417  | 25336  | 13.059  | 8.976    |
| 4     | 16.222    | 749746  | 22775  | 12.944  | 8.069    |
| Total |           | 5792294 | 282265 | 100.000 | 100.000  |

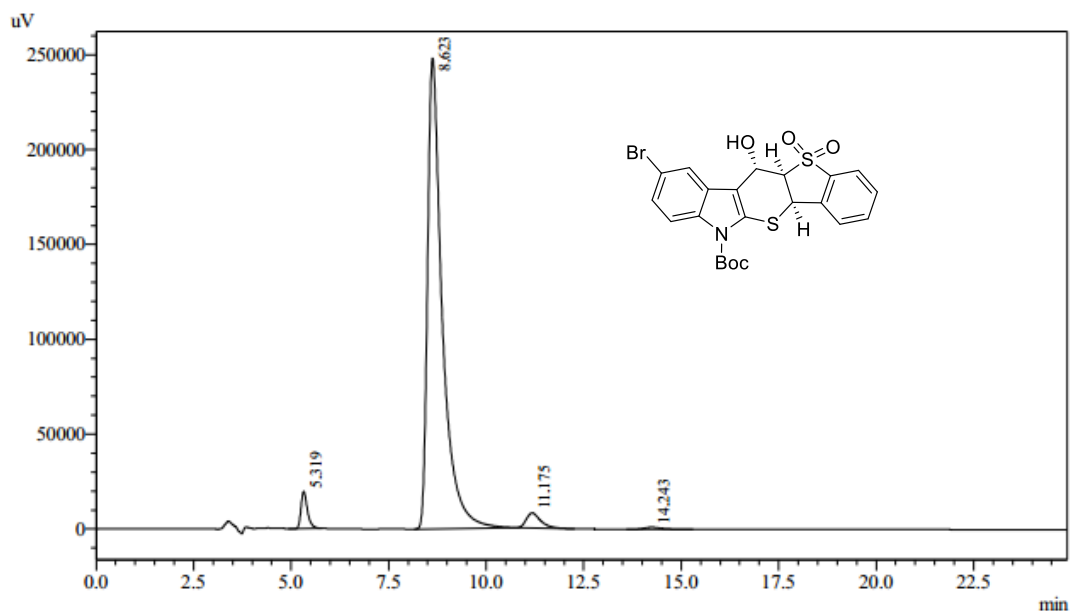

1 Det.A Ch1 / 254nm

Detector A Ch1 254nm

| Peak# | Ret. Time | Area    | Height | Area %  | Height % |
|-------|-----------|---------|--------|---------|----------|
| 1     | 5.319     | 226733  | 19698  | 3.252   | 7.116    |
| 2     | 8.623     | 6509417 | 248118 | 93.350  | 89.641   |
| 3     | 11.175    | 206322  | 7921   | 2.959   | 2.862    |
| 4     | 14.243    | 30692   | 1054   | 0.440   | 0.381    |
| Total |           | 6973163 | 276791 | 100.000 | 100.000  |

<sup>1</sup>H and <sup>13</sup>C NMR of **3f**

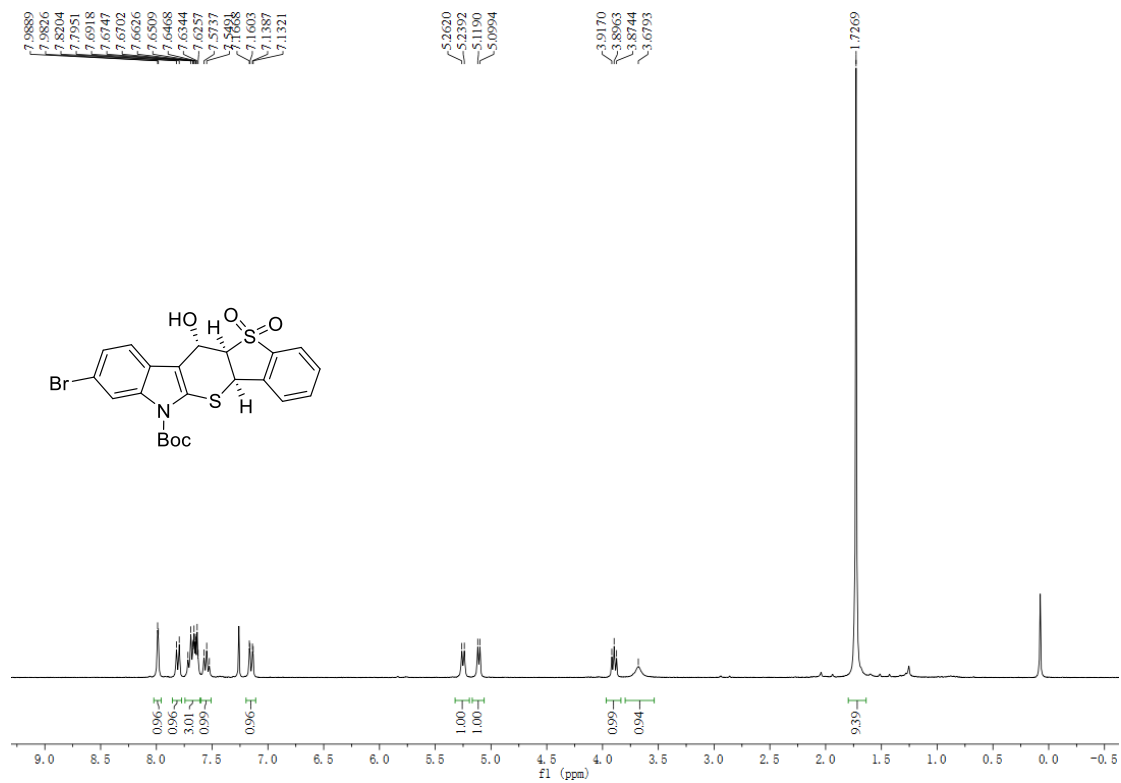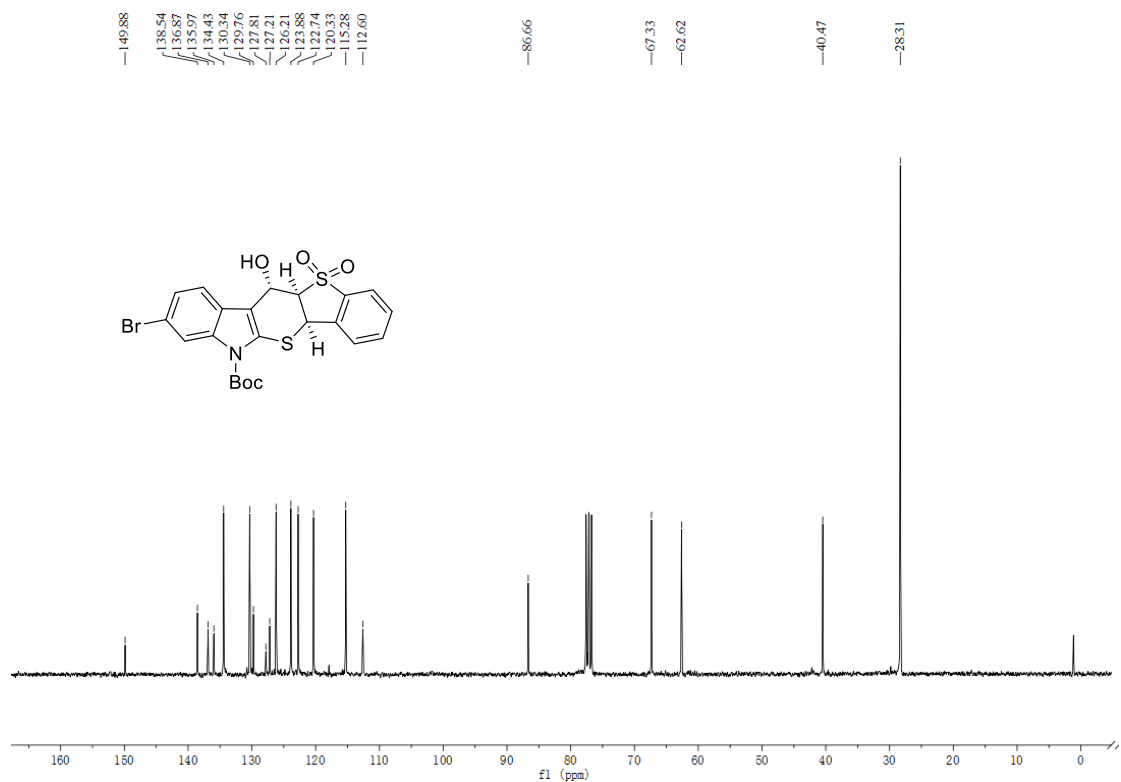

### HPLC of 3f

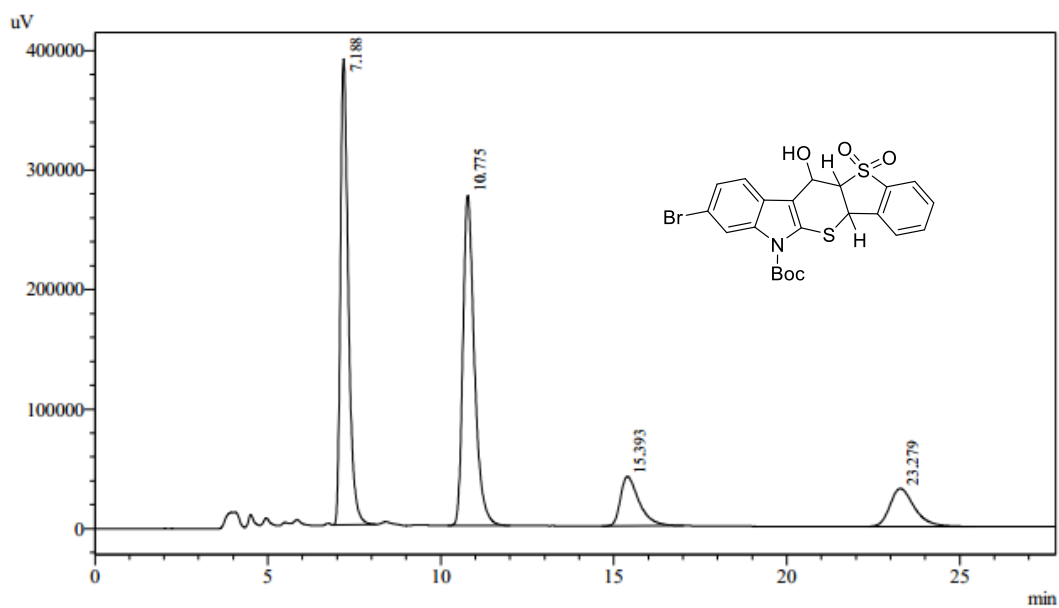

Detector A Ch1 254nm

| Peak# | Ret. Time | Area     | Height | Area %  | Height % |
|-------|-----------|----------|--------|---------|----------|
| 1     | 7.188     | 6197228  | 390024 | 39.528  | 52.756   |
| 2     | 10.775    | 6360812  | 276112 | 40.571  | 37.348   |
| 3     | 15.393    | 1543001  | 41323  | 9.842   | 5.590    |
| 4     | 23.279    | 1577196  | 31836  | 10.060  | 4.306    |
| Total |           | 15678237 | 739295 | 100.000 | 100.000  |

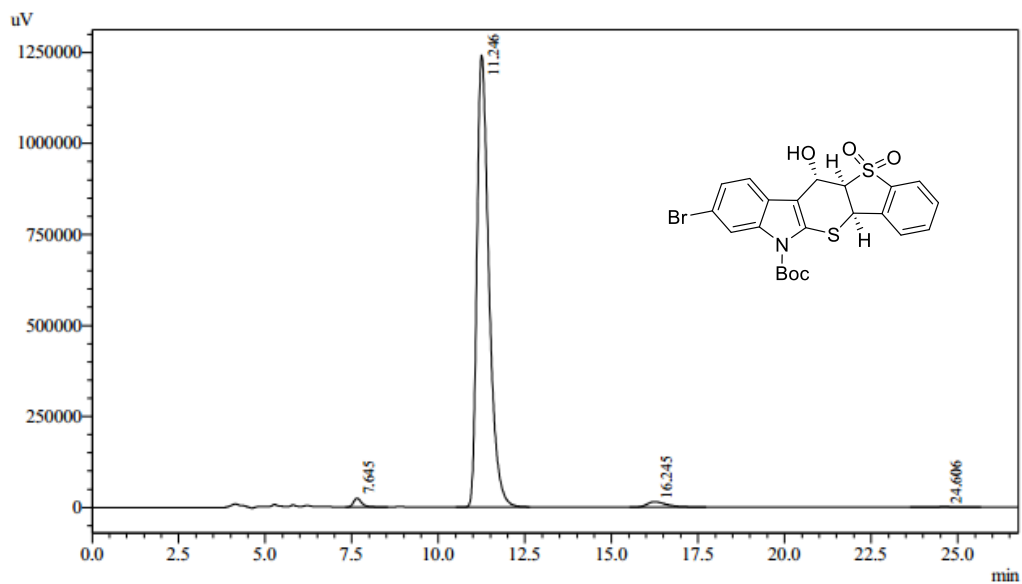

Detector A Ch1 254nm

| Peak# | Ret. Time | Area     | Height  | Area %  | Height % |
|-------|-----------|----------|---------|---------|----------|
| 1     | 7.645     | 402573   | 24504   | 1.298   | 1.911    |
| 2     | 11.246    | 29965004 | 1241387 | 96.647  | 96.836   |
| 3     | 16.245    | 583198   | 14921   | 1.881   | 1.164    |
| 4     | 24.606    | 53721    | 1131    | 0.173   | 0.088    |
| Total |           | 31004496 | 1281943 | 100.000 | 100.000  |

# <sup>1</sup>H and <sup>13</sup>C NMR of 3g

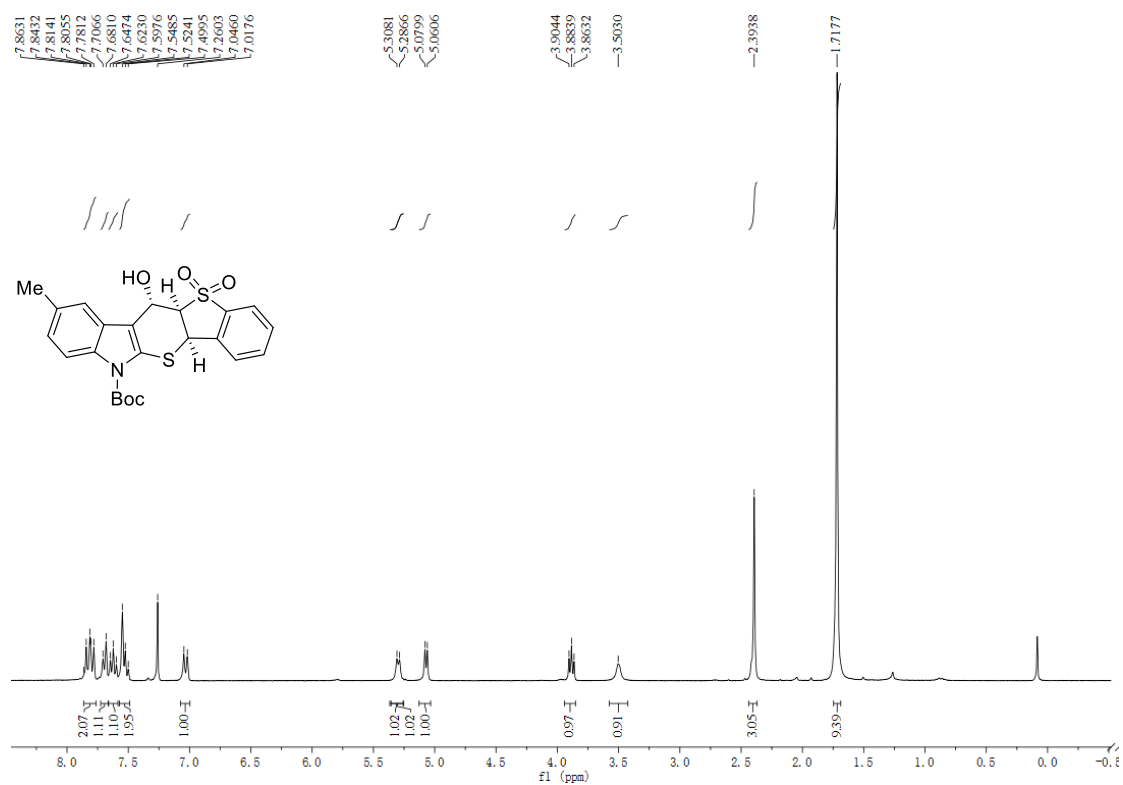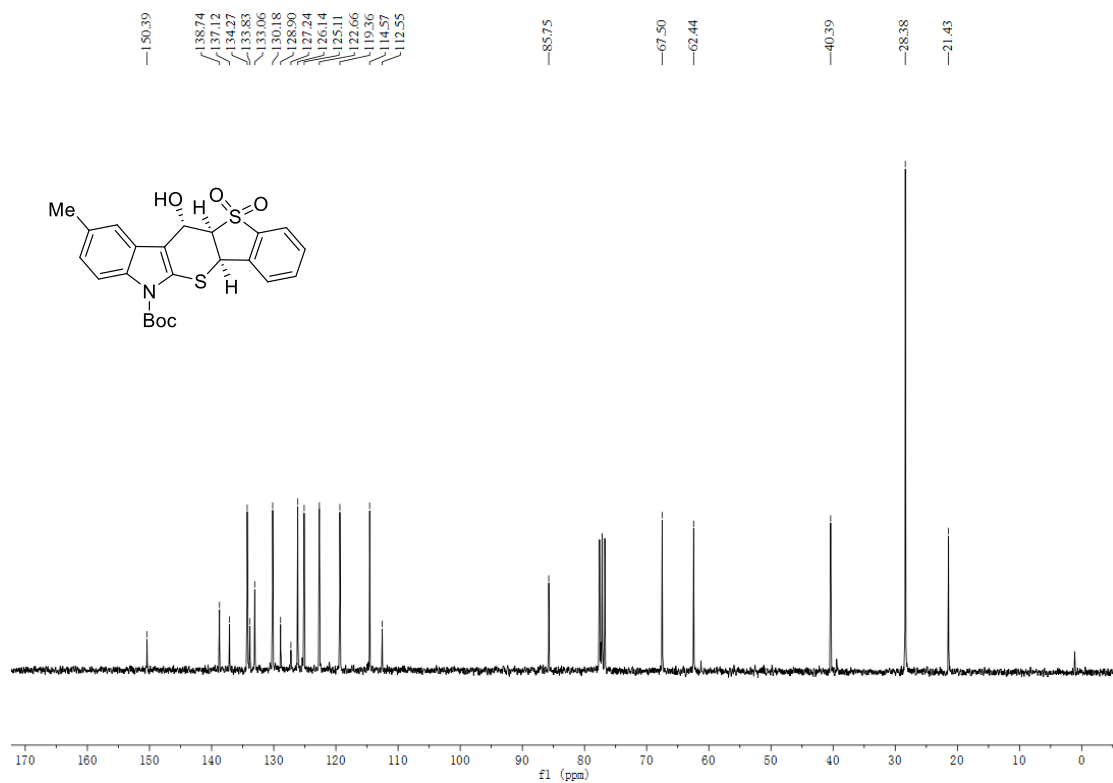

### HPLC of 3g

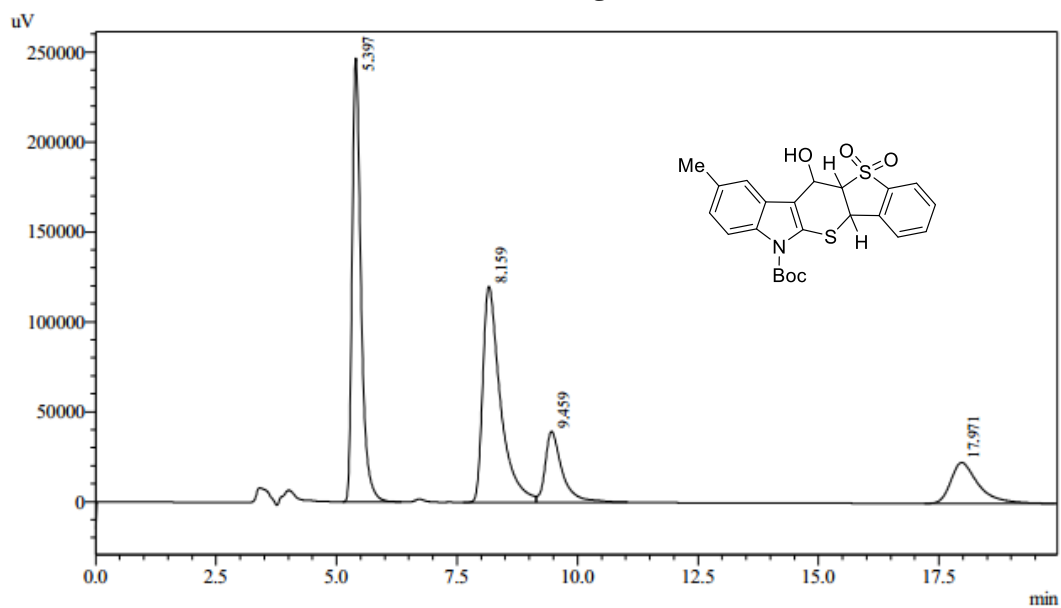

Detector A Ch1 254nm

| Peak# | Ret. Time | Area    | Height | Area %  | Height % |
|-------|-----------|---------|--------|---------|----------|
| 1     | 5.397     | 3140658 | 246731 | 38.881  | 57.513   |
| 2     | 8.159     | 3065400 | 120118 | 37.950  | 27.999   |
| 3     | 9.459     | 963519  | 39441  | 11.928  | 9.194    |
| 4     | 17.971    | 907961  | 22713  | 11.241  | 5.294    |
| Total |           | 8077538 | 429002 | 100.000 | 100.000  |

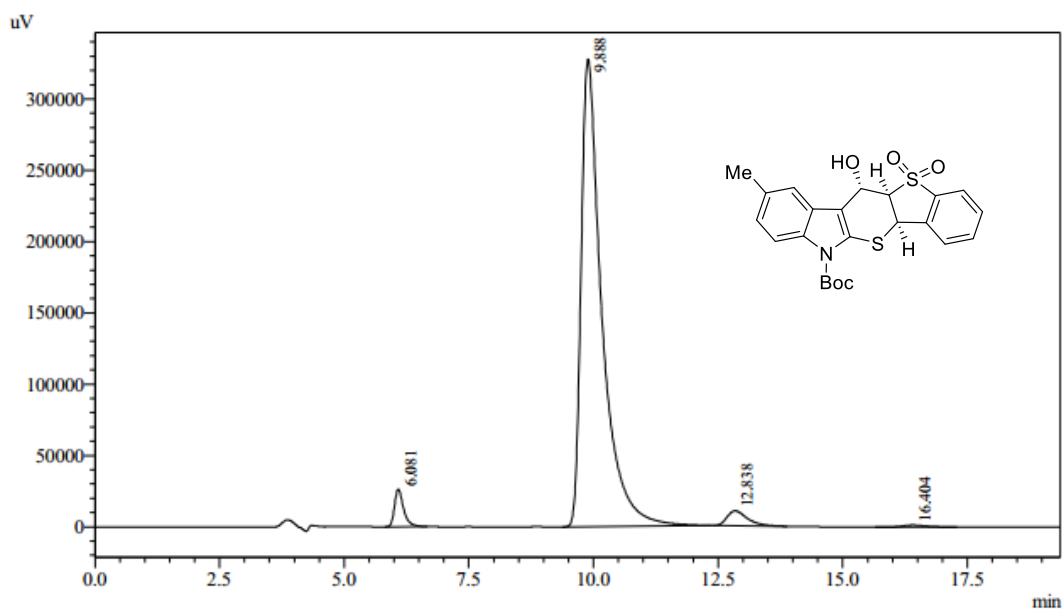

Detector A Ch1 254nm

| Peak# | Ret. Time | Area     | Height | Area %  | Height % |
|-------|-----------|----------|--------|---------|----------|
| 1     | 6.081     | 331268   | 26324  | 3.246   | 7.191    |
| 2     | 9.888     | 9530437  | 327894 | 93.372  | 89.575   |
| 3     | 12.838    | 303111   | 10490  | 2.970   | 2.866    |
| 4     | 16.404    | 42156    | 1348   | 0.413   | 0.368    |
| Total |           | 10206972 | 366056 | 100.000 | 100.000  |

<sup>1</sup>H and <sup>13</sup>C NMR of **3h**

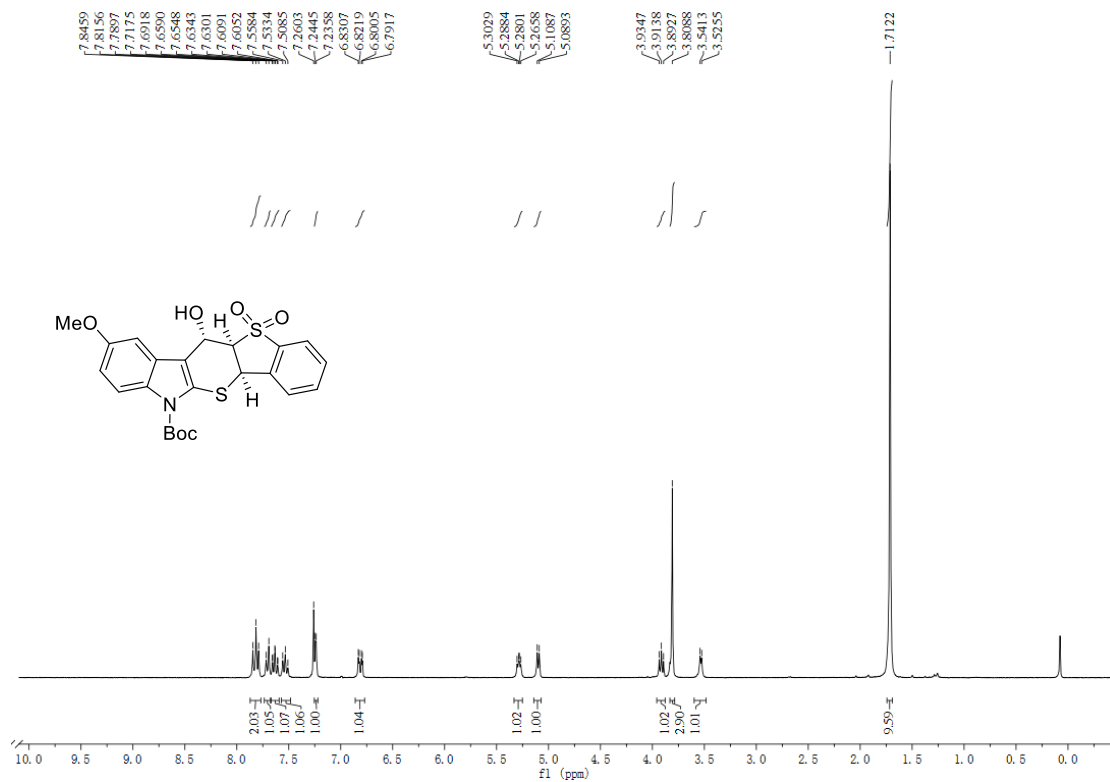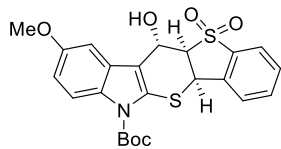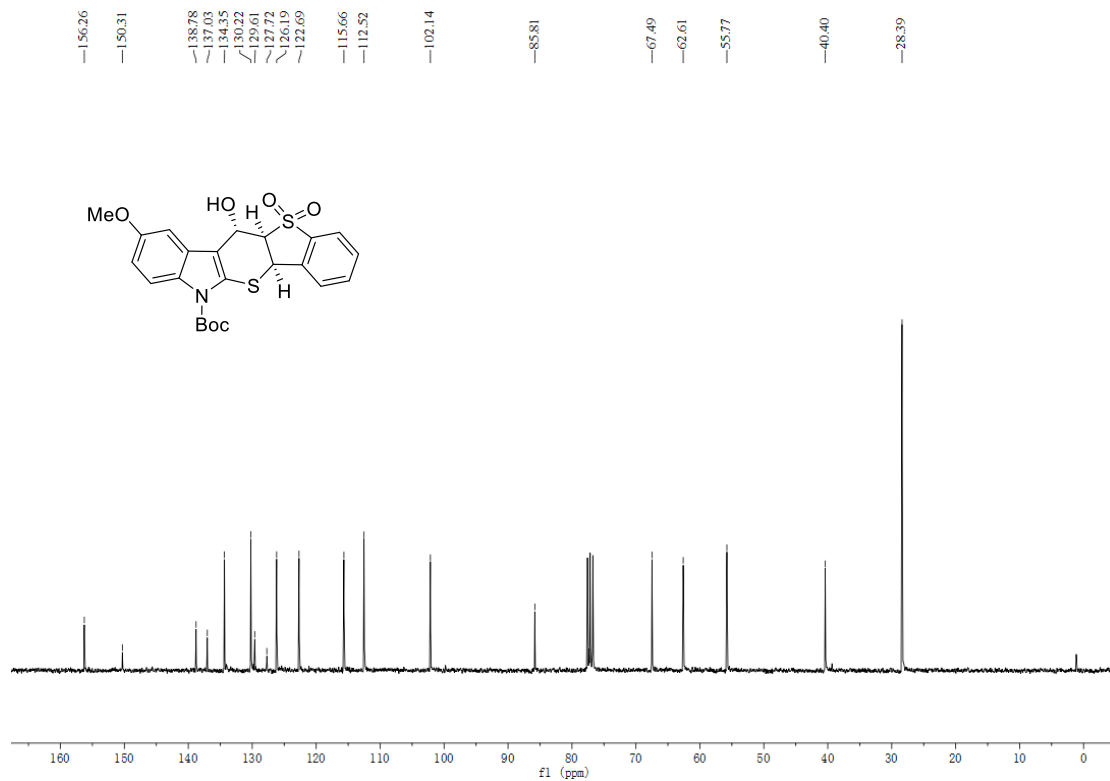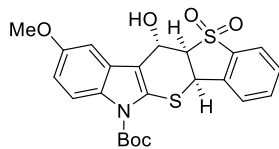

### HPLC of 3h

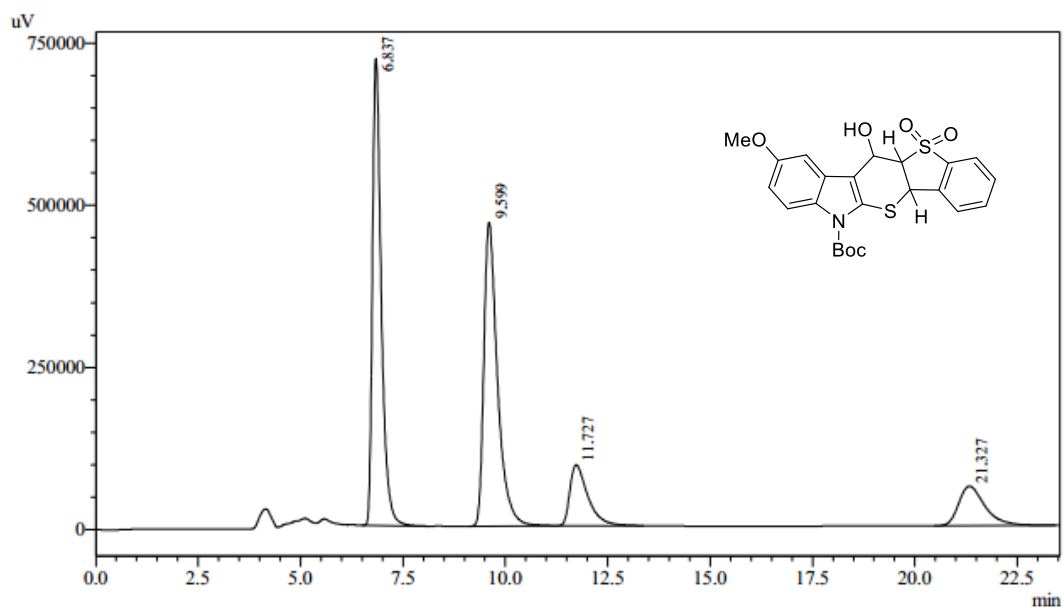

Detector A Ch1 254nm

| Peak# | Ret. Time | Area     | Height  | Area %  | Height % |
|-------|-----------|----------|---------|---------|----------|
| 1     | 6.837     | 10820130 | 720318  | 39.608  | 53.584   |
| 2     | 9.599     | 10859950 | 468969  | 39.754  | 34.886   |
| 3     | 11.727    | 2902852  | 94071   | 10.626  | 6.998    |
| 4     | 21.327    | 2734780  | 60930   | 10.011  | 4.532    |
| Total |           | 27317713 | 1344287 | 100.000 | 100.000  |

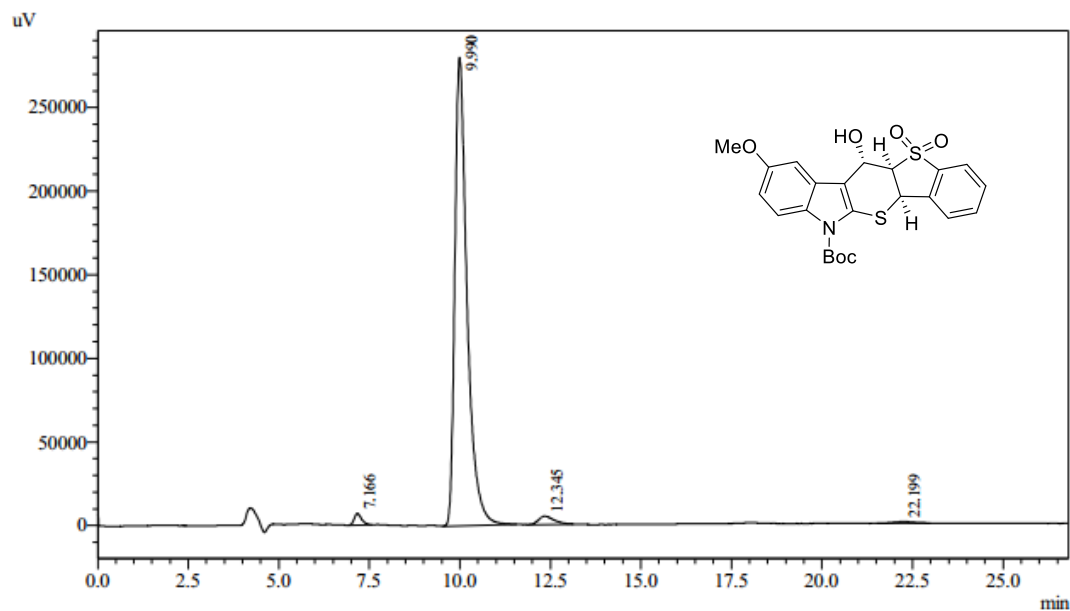

Detector A Ch1 254nm

| Peak# | Ret. Time | Area    | Height | Area %  | Height % |
|-------|-----------|---------|--------|---------|----------|
| 1     | 7.166     | 98450   | 6845   | 1.434   | 2.338    |
| 2     | 9.990     | 6583183 | 280154 | 95.912  | 95.690   |
| 3     | 12.345    | 145269  | 4869   | 2.116   | 1.663    |
| 4     | 22.199    | 36882   | 905    | 0.537   | 0.309    |
| Total |           | 6863784 | 292773 | 100.000 | 100.000  |



<sup>1</sup>H and <sup>13</sup>C NMR of **3i**

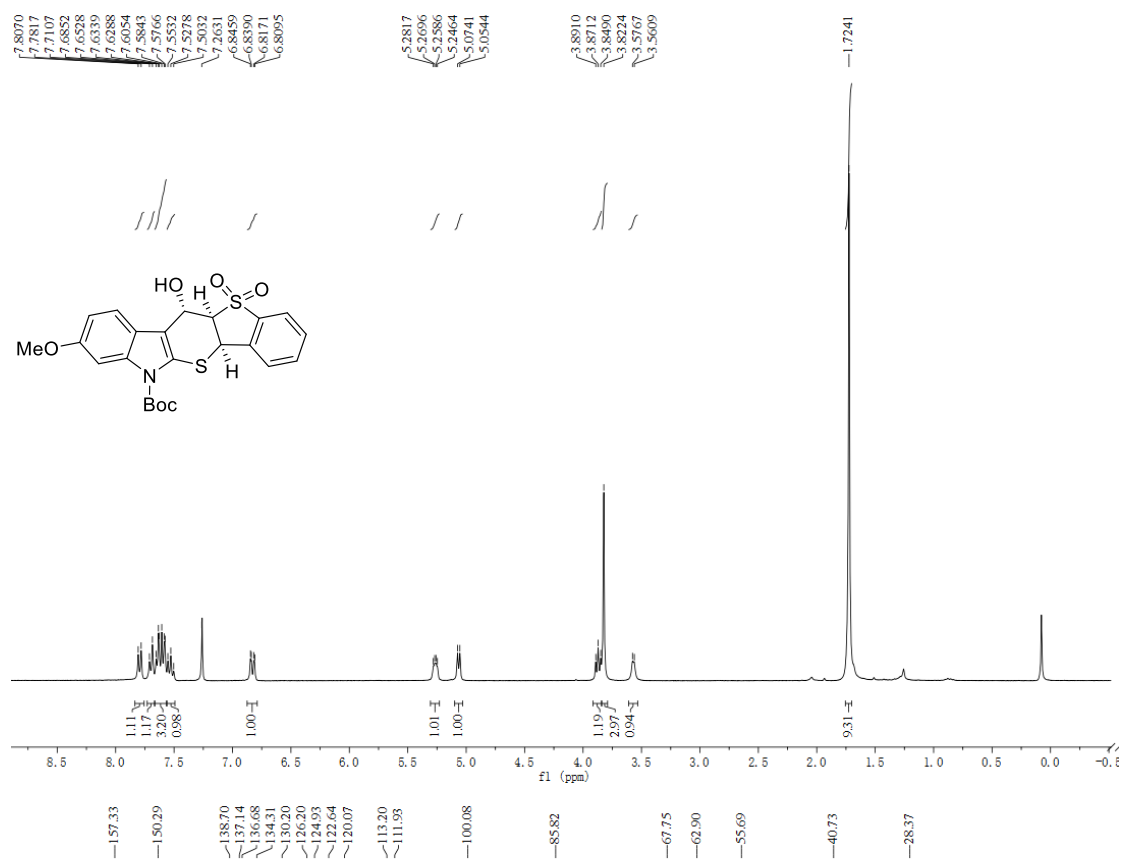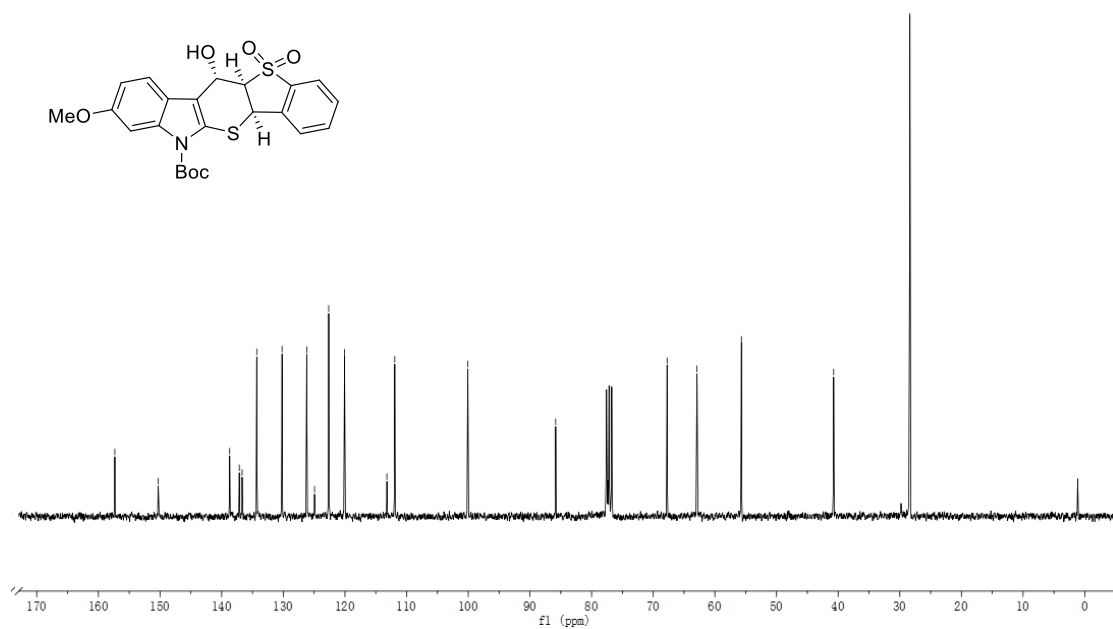

### HPLC of 3i

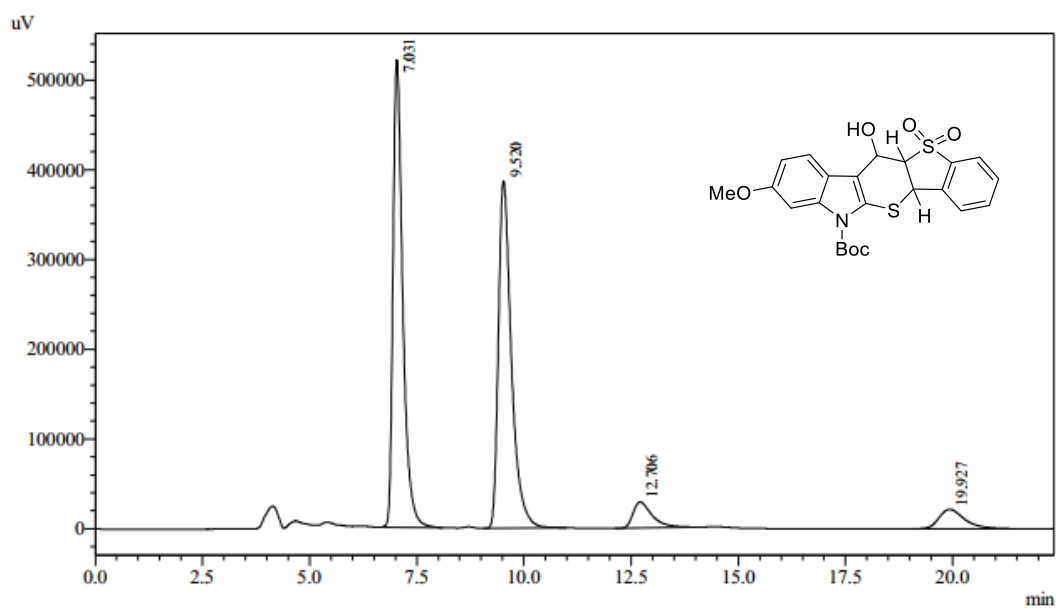

1 Det.A Ch1 / 254nm

Detector A Ch1 254nm

| Peak# | Ret. Time | Area     | Height | Area %  | Height % |
|-------|-----------|----------|--------|---------|----------|
| 1     | 7.031     | 8216537  | 520947 | 45.275  | 54.337   |
| 2     | 9.520     | 8144136  | 387236 | 44.876  | 40.390   |
| 3     | 12.706    | 885617   | 28869  | 4.880   | 3.011    |
| 4     | 19.927    | 901732   | 21683  | 4.969   | 2.262    |
| Total |           | 18148022 | 958735 | 100.000 | 100.000  |

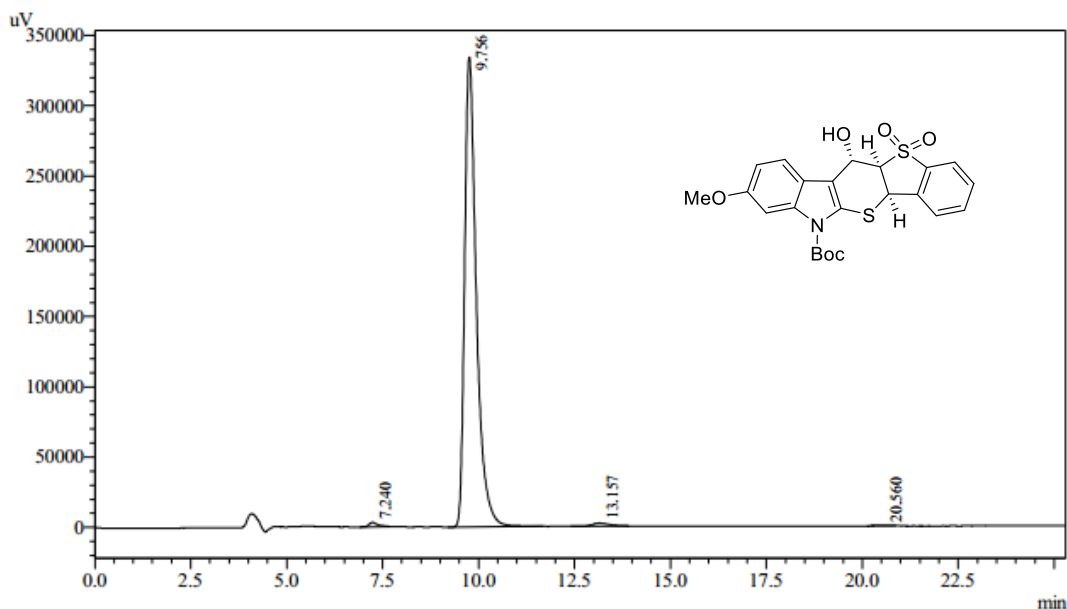

1 Det.A Ch1 / 254nm

Detector A Ch1 254nm

| Peak# | Ret. Time | Area    | Height | Area %  | Height % |
|-------|-----------|---------|--------|---------|----------|
| 1     | 7.240     | 49220   | 3040   | 0.682   | 0.895    |
| 2     | 9.756     | 7107841 | 334418 | 98.418  | 98.458   |
| 3     | 13.157    | 63915   | 2107   | 0.885   | 0.620    |
| 4     | 20.560    | 1112    | 89     | 0.015   | 0.026    |
| Total |           | 7222087 | 339654 | 100.000 | 100.000  |

# $^1\text{H}$ and $^{13}\text{C}$ NMR of **3j**

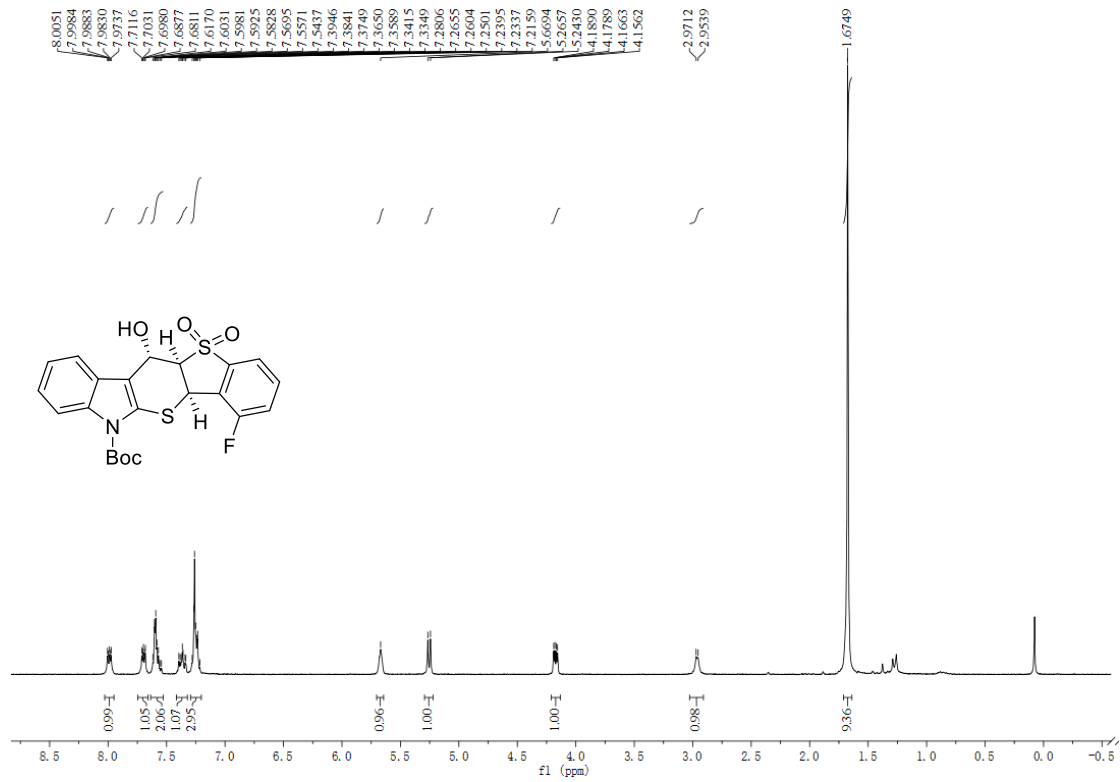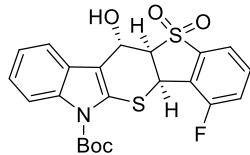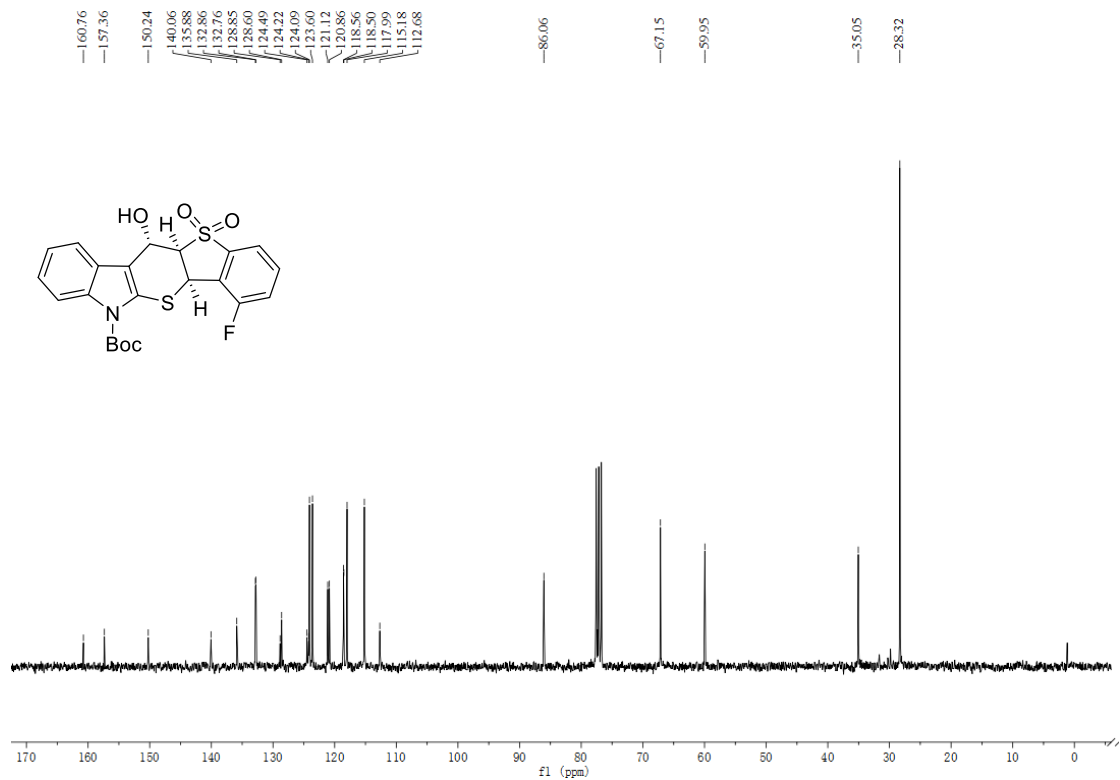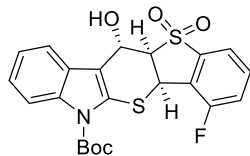

### HPLC of 3j

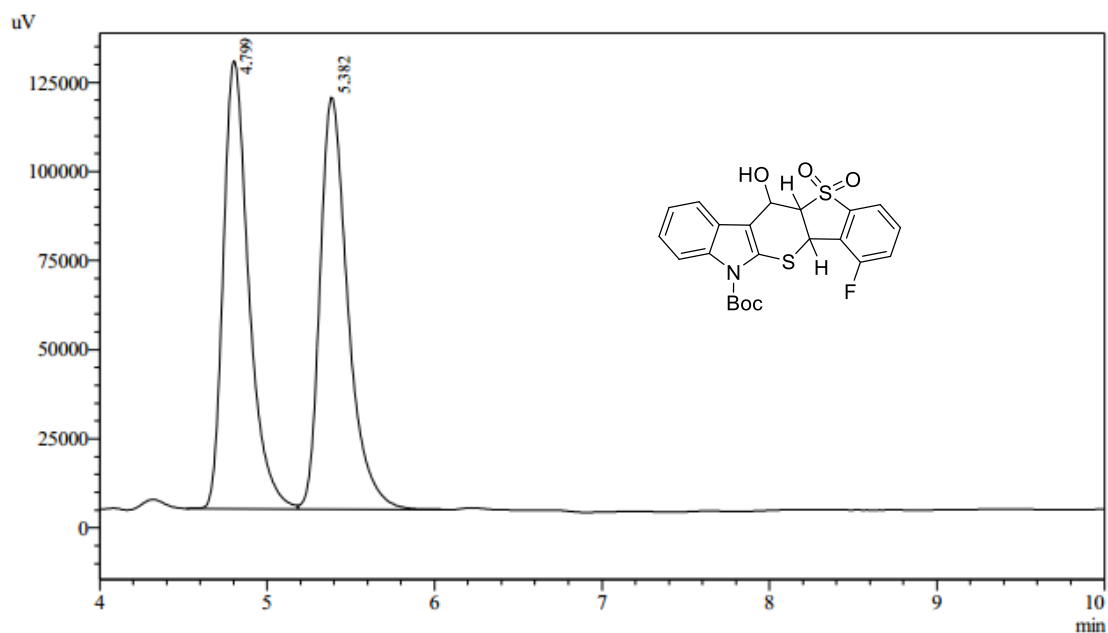

Detector A Ch1 254nm

| Peak# | Ret. Time | Area    | Height | Area %  | Height % |
|-------|-----------|---------|--------|---------|----------|
| 1     | 4.799     | 1325077 | 125718 | 49.797  | 52.108   |
| 2     | 5.382     | 1335859 | 115548 | 50.203  | 47.892   |
| Total |           | 2660936 | 241266 | 100.000 | 100.000  |

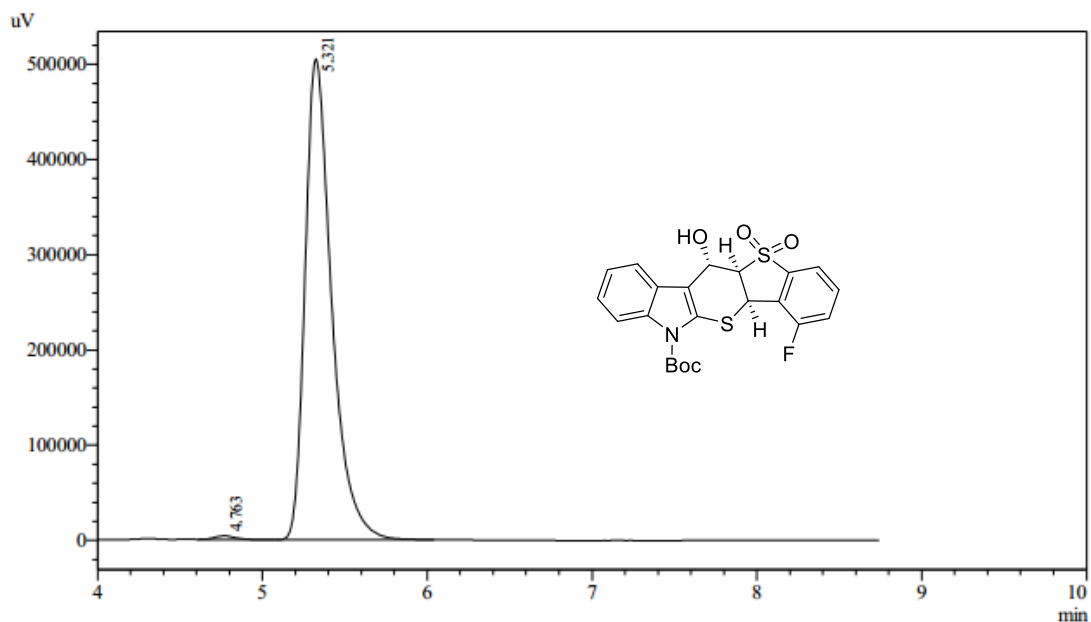

Detector A Ch1 254nm

| Peak# | Ret. Time | Area    | Height | Area %  | Height % |
|-------|-----------|---------|--------|---------|----------|
| 1     | 4.763     | 34684   | 3803   | 0.606   | 0.747    |
| 2     | 5.321     | 5685126 | 505307 | 99.394  | 99.253   |
| Total |           | 5719811 | 509110 | 100.000 | 100.000  |

# <sup>1</sup>H and <sup>13</sup>C NMR of 3k

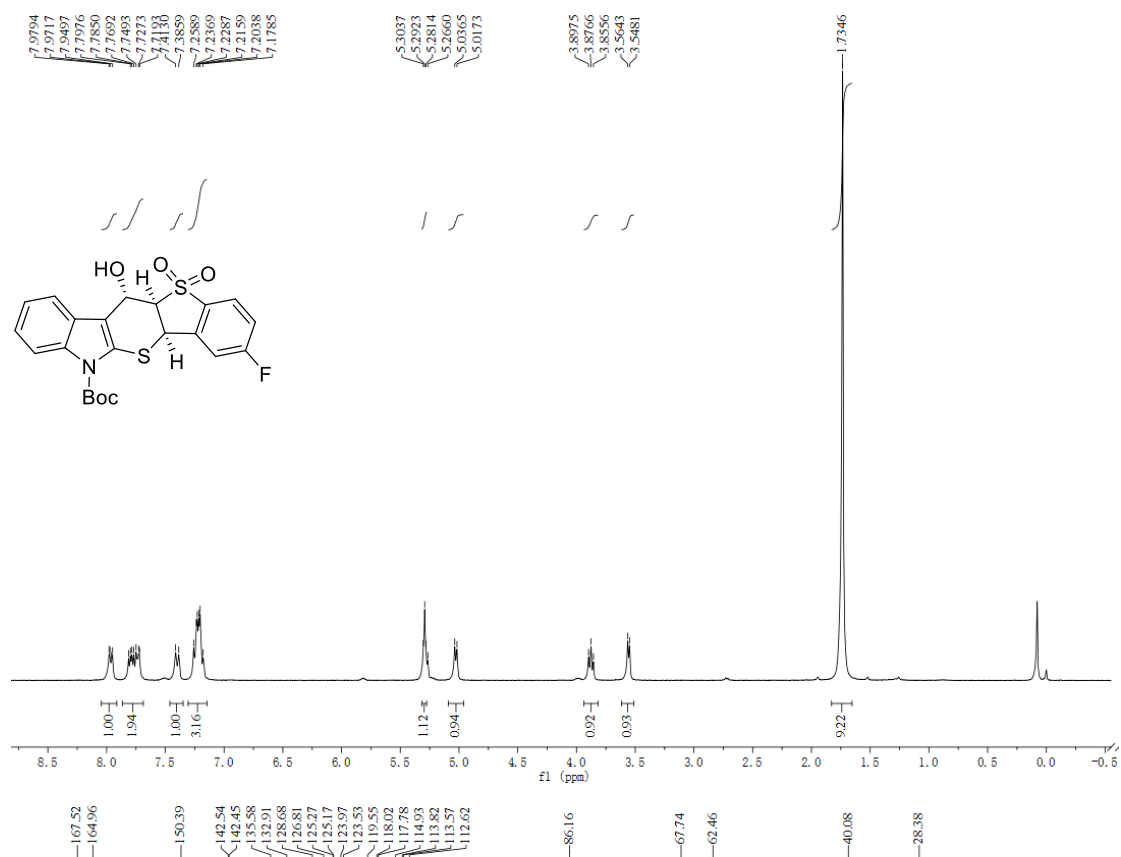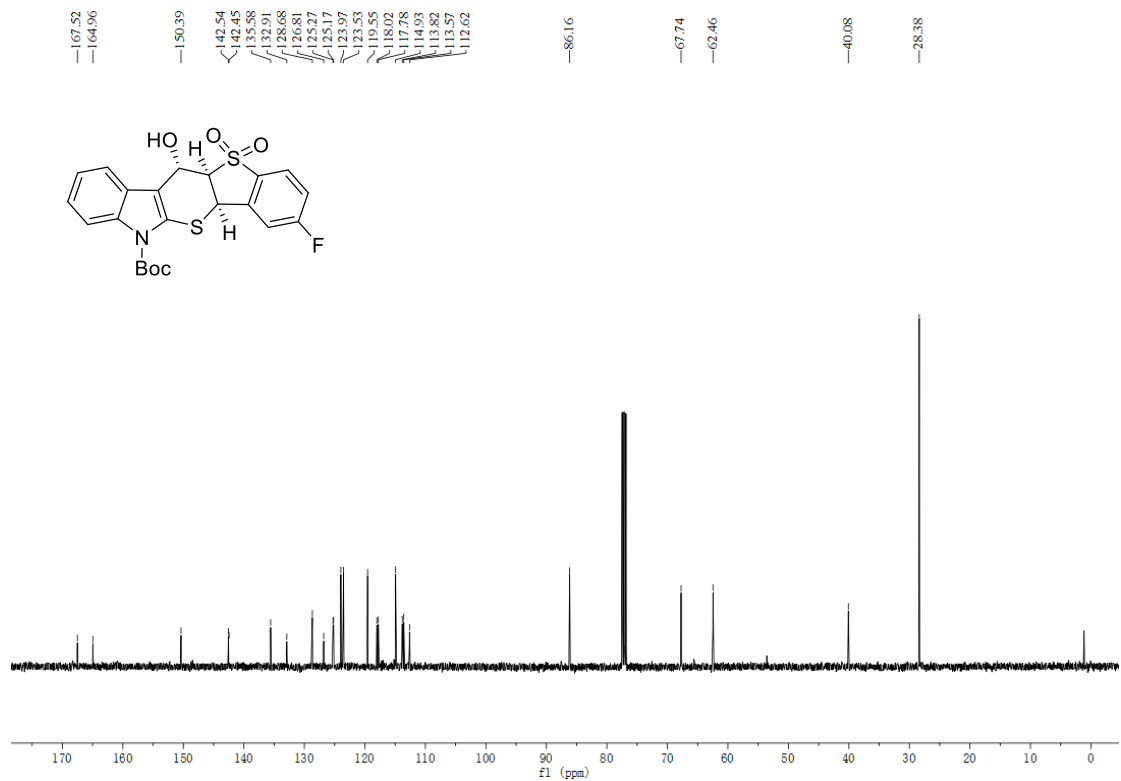

### HPLC of 3k

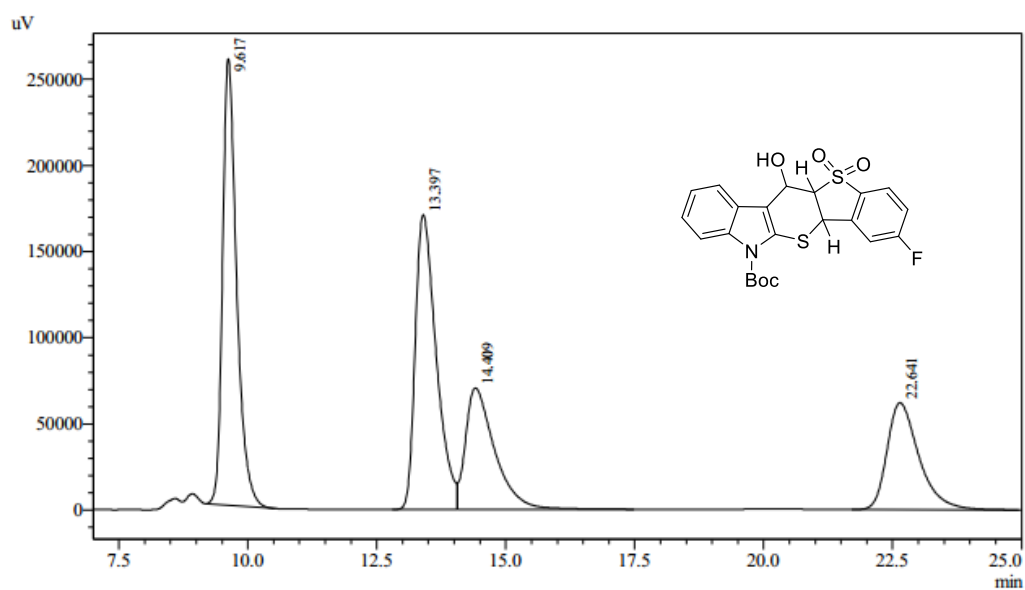

Detector A Ch1 254nm

| Peak# | Ret. Time | Area     | Height | Area %  | Height % |
|-------|-----------|----------|--------|---------|----------|
| 1     | 9.617     | 4923019  | 259090 | 32.369  | 46.067   |
| 2     | 13.397    | 4846001  | 170959 | 31.863  | 30.397   |
| 3     | 14.409    | 2771492  | 70406  | 18.223  | 12.518   |
| 4     | 22.641    | 2668359  | 61969  | 17.545  | 11.018   |
| Total |           | 15208871 | 562424 | 100.000 | 100.000  |

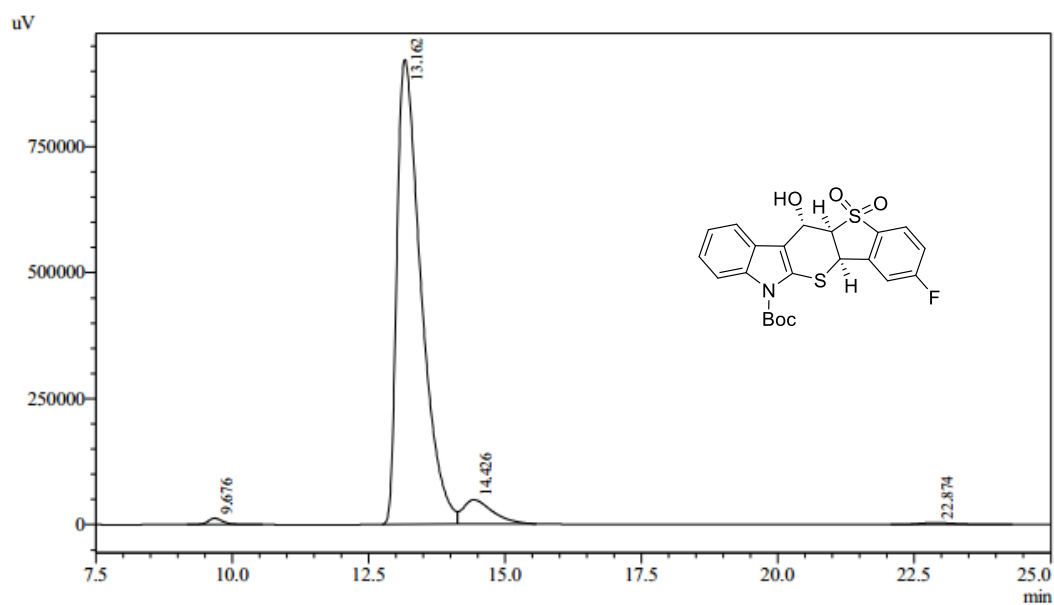

Detector A Ch1 254nm

| Peak# | Ret. Time | Area     | Height | Area %  | Height % |
|-------|-----------|----------|--------|---------|----------|
| 1     | 9.676     | 246014   | 12643  | 0.806   | 1.281    |
| 2     | 13.162    | 28273348 | 922276 | 92.623  | 93.434   |
| 3     | 14.426    | 1834654  | 48331  | 6.010   | 4.896    |
| 4     | 22.874    | 171292   | 3840   | 0.561   | 0.389    |
| Total |           | 30525307 | 987091 | 100.000 | 100.000  |

<sup>1</sup>H and <sup>13</sup>C NMR of **31**

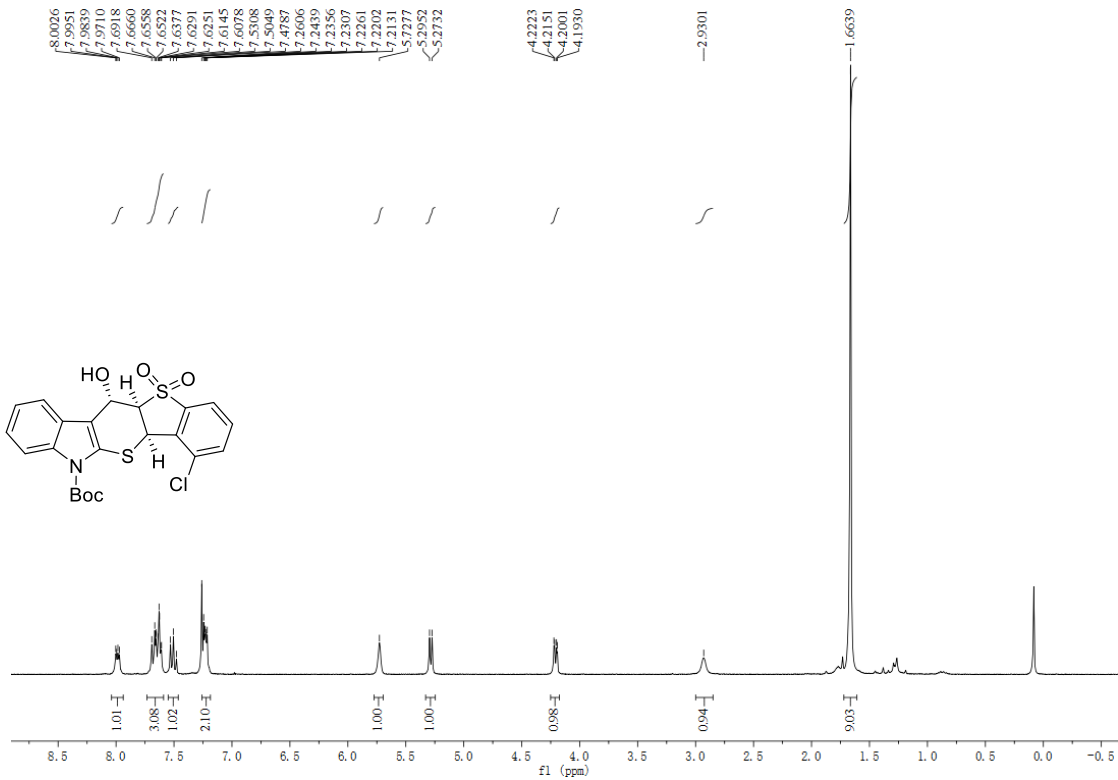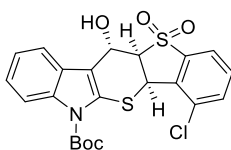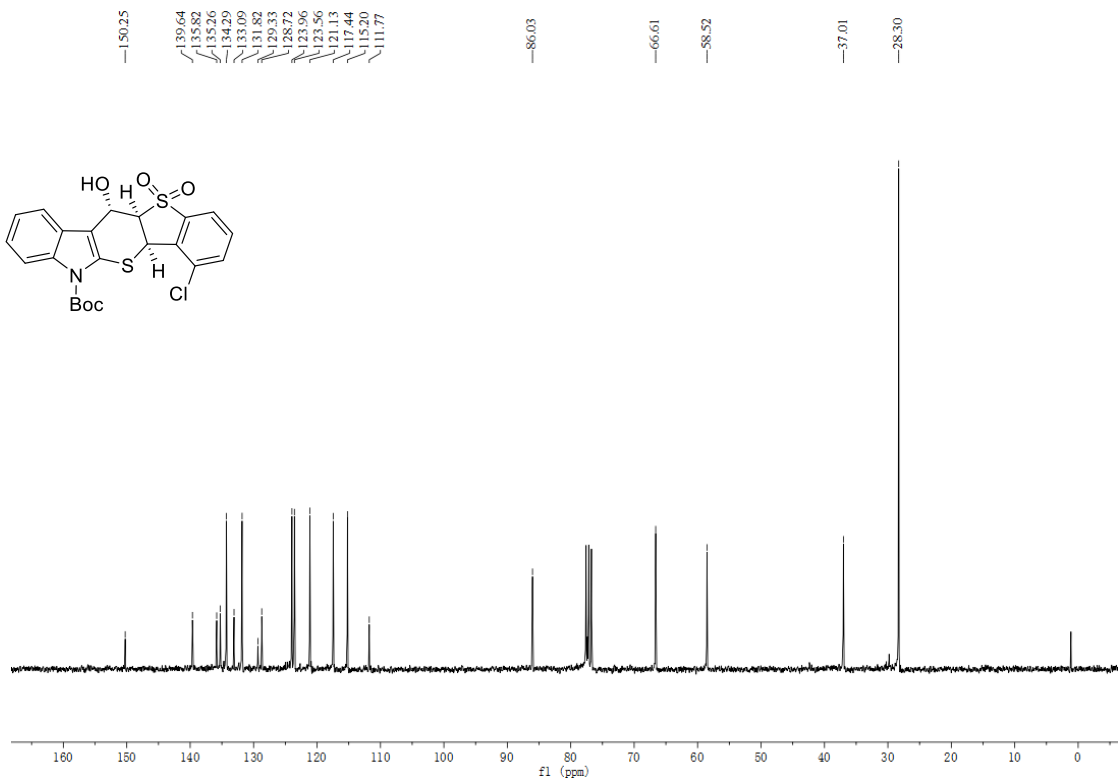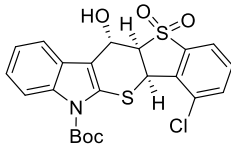

### HPLC of 3I

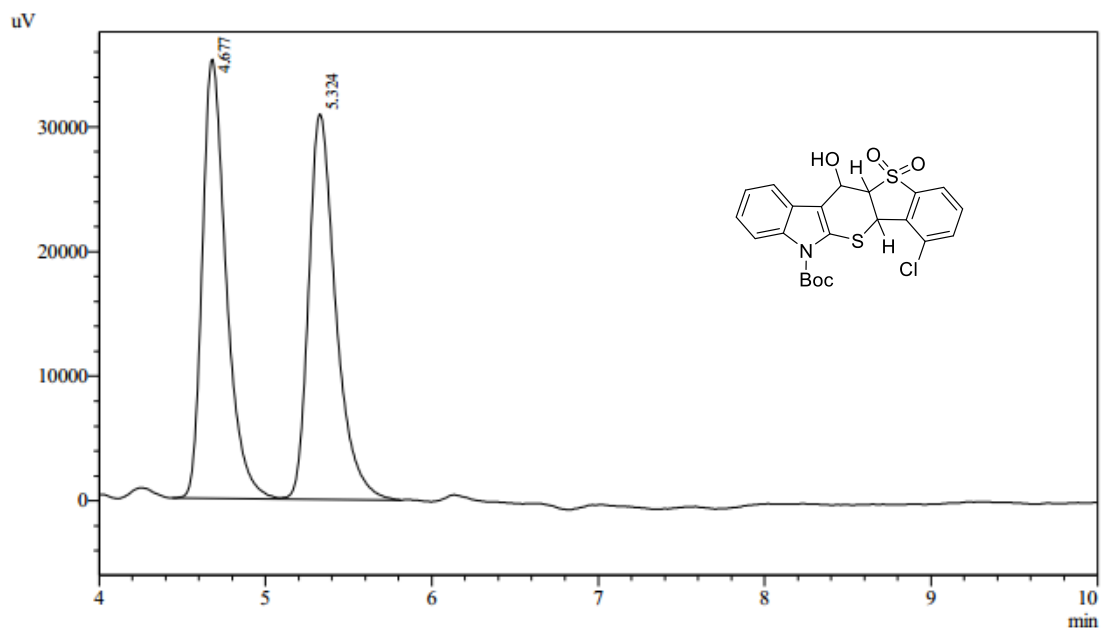

Detector A Ch1 254nm

| Peak# | Ret. Time | Area   | Height | Area %  | Height % |
|-------|-----------|--------|--------|---------|----------|
| 1     | 4.677     | 352139 | 35219  | 50.065  | 53.282   |
| 2     | 5.324     | 351226 | 30880  | 49.935  | 46.718   |
| Total |           | 703364 | 66100  | 100.000 | 100.000  |

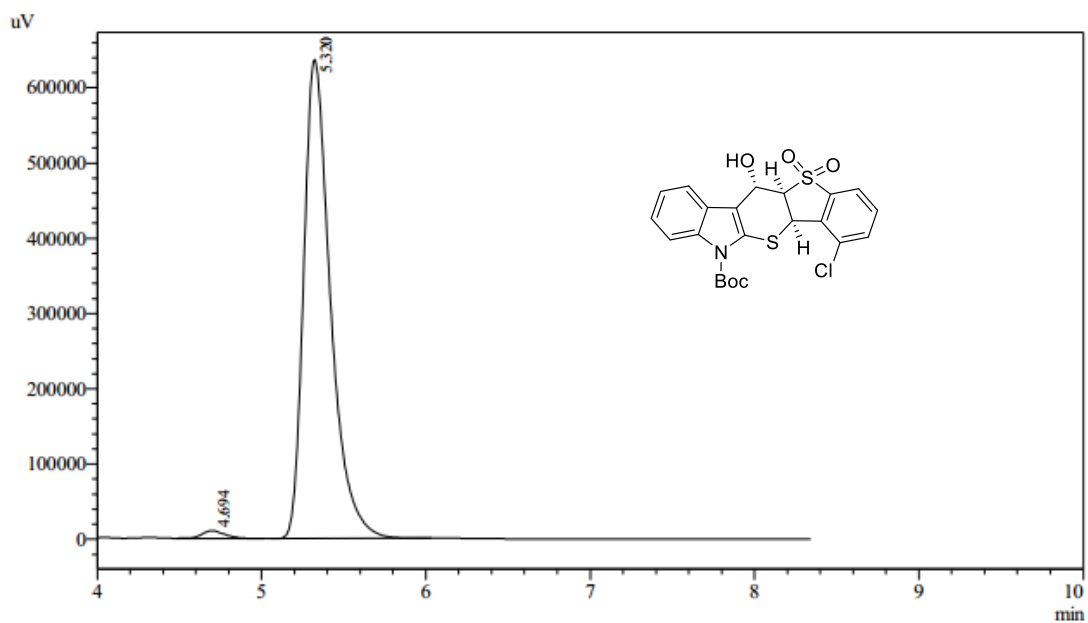

Detector A Ch1 254nm

| Peak# | Ret. Time | Area    | Height | Area %  | Height % |
|-------|-----------|---------|--------|---------|----------|
| 1     | 4.694     | 98879   | 10243  | 1.351   | 1.583    |
| 2     | 5.320     | 7219896 | 636679 | 98.649  | 98.417   |
| Total |           | 7318775 | 646923 | 100.000 | 100.000  |



# <sup>1</sup>H and <sup>13</sup>C NMR of 3m

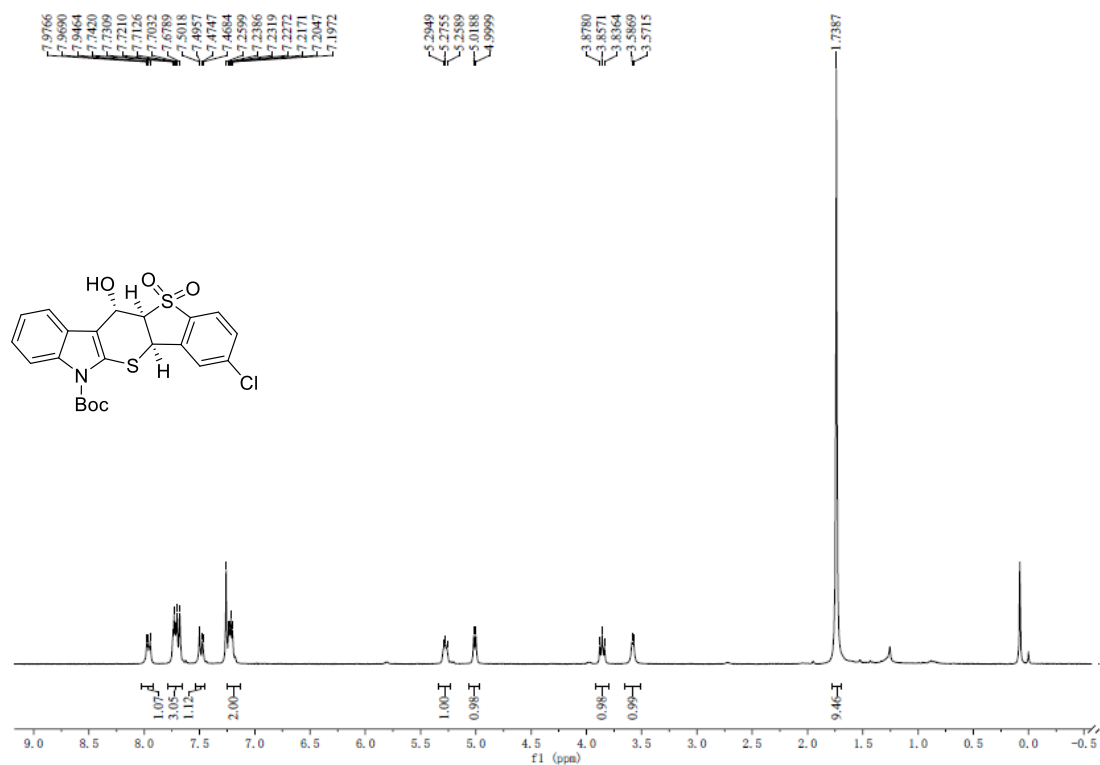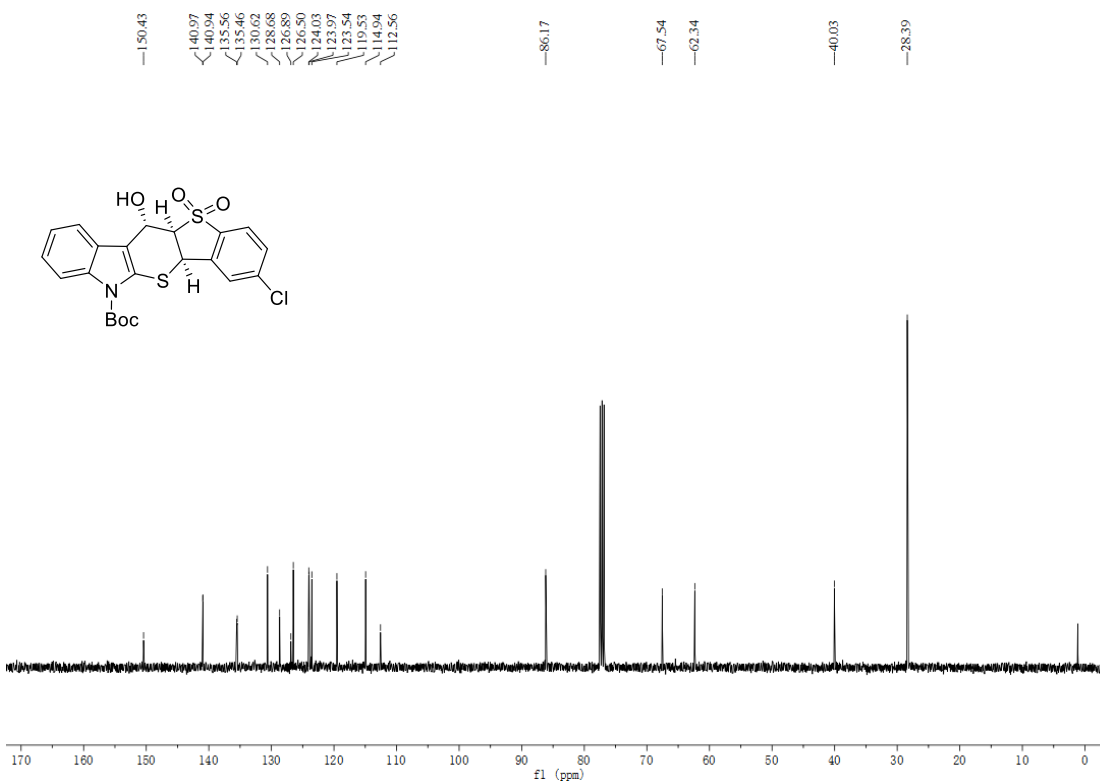

### HPLC of 3m

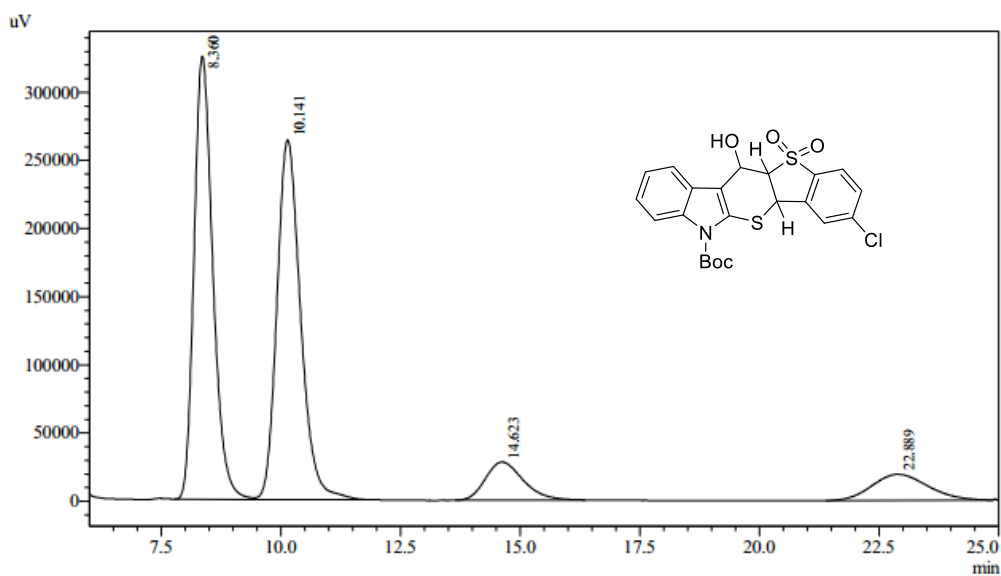

Detector A Ch1 254nm

| Peak# | Ret. Time | Area     | Height | Area %  | Height % |
|-------|-----------|----------|--------|---------|----------|
| 1     | 8.360     | 8866221  | 324945 | 42.169  | 51.104   |
| 2     | 10.141    | 9055227  | 263761 | 43.067  | 41.481   |
| 3     | 14.623    | 1542392  | 27994  | 7.336   | 4.403    |
| 4     | 22.889    | 1561832  | 19157  | 7.428   | 3.013    |
| Total |           | 21025672 | 635856 | 100.000 | 100.000  |

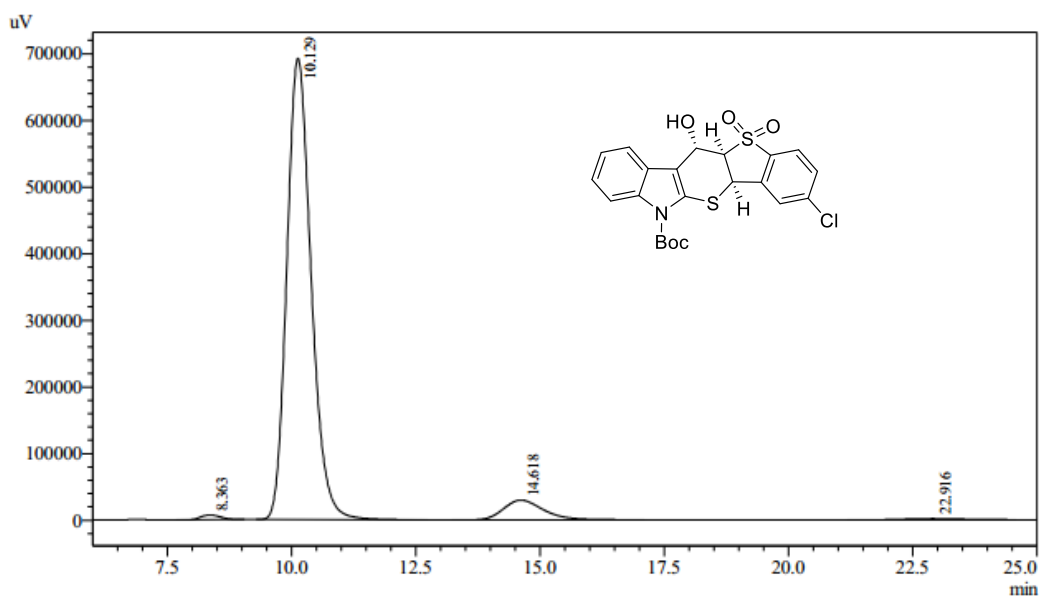

Detector A Ch1 254nm

| Peak# | Ret. Time | Area     | Height | Area %  | Height % |
|-------|-----------|----------|--------|---------|----------|
| 1     | 8.363     | 188915   | 6946   | 0.739   | 0.951    |
| 2     | 10.129    | 23546523 | 692367 | 92.170  | 94.756   |
| 3     | 14.618    | 1674902  | 29618  | 6.556   | 4.053    |
| 4     | 22.916    | 136591   | 1754   | 0.535   | 0.240    |
| Total |           | 25546930 | 730684 | 100.000 | 100.000  |

<sup>1</sup>H and <sup>13</sup>C NMR of **3n**

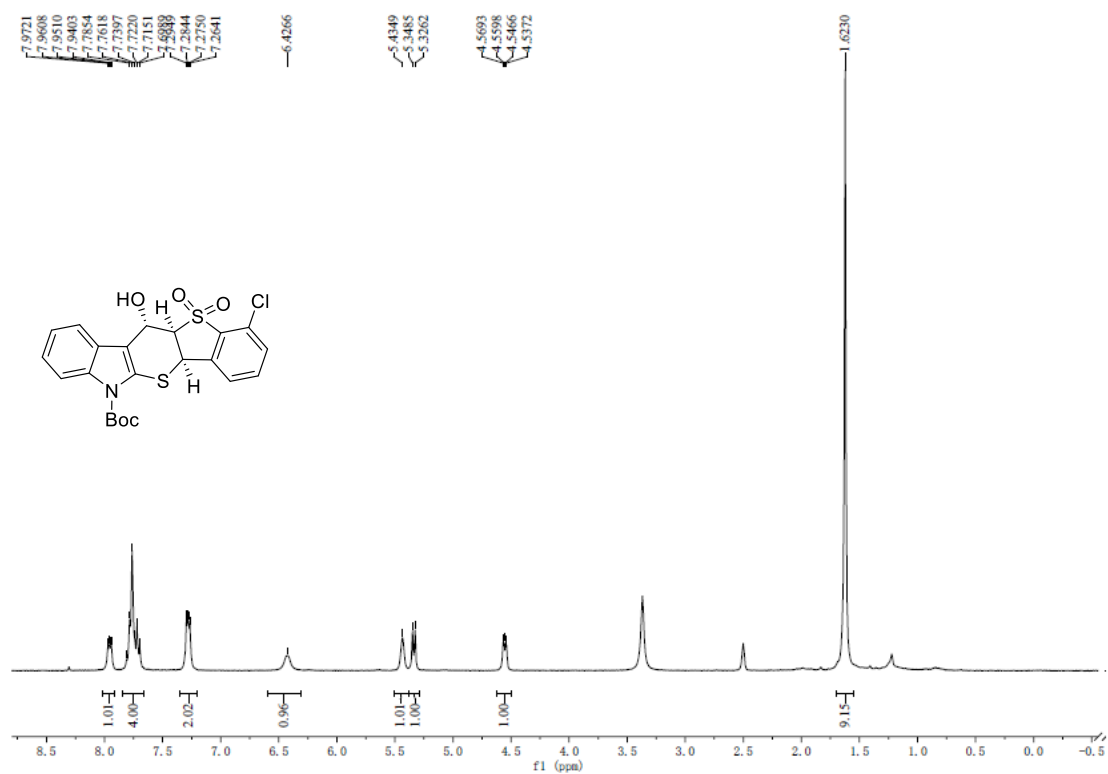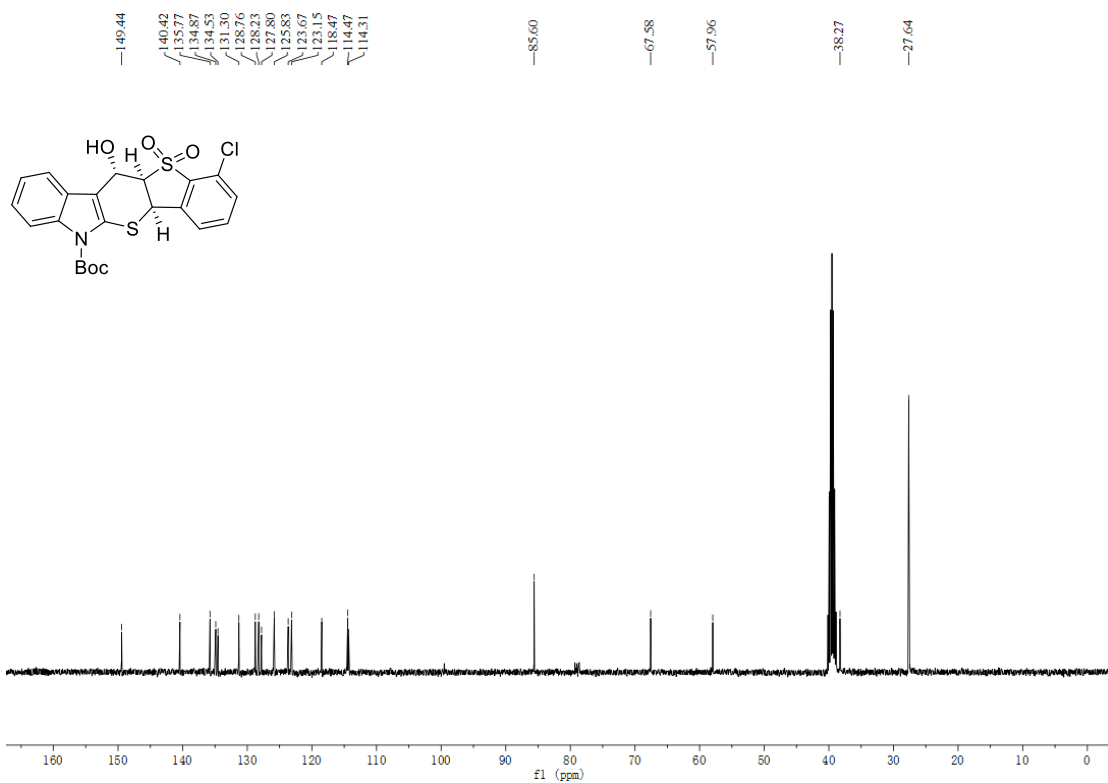

### HPLC of 3n

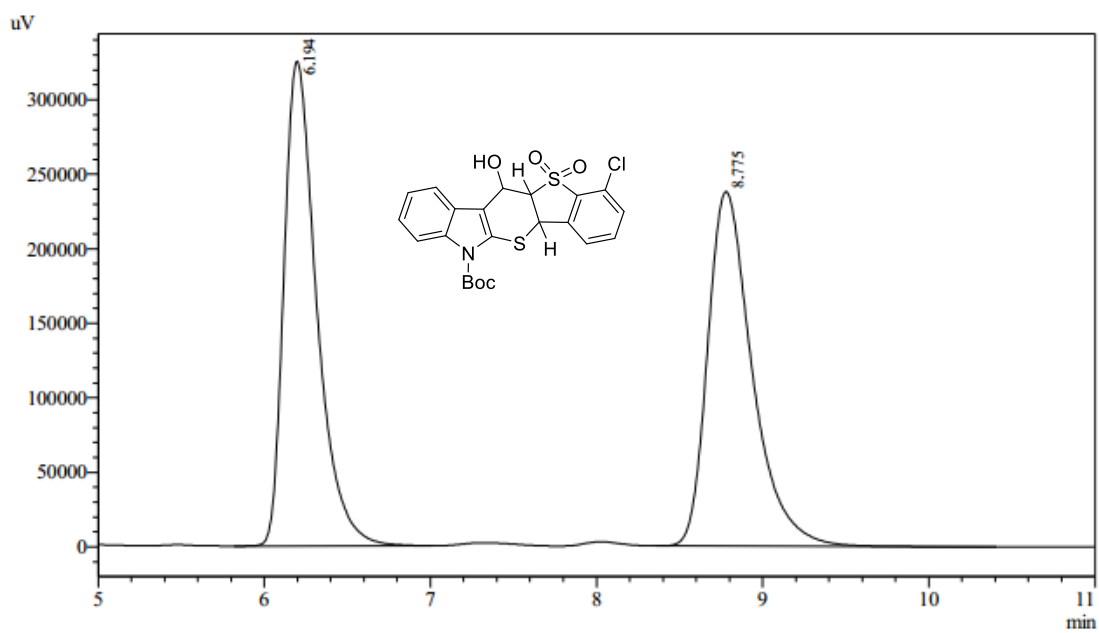

Detector A Ch1 254nm

| Peak# | Ret. Time | Area    | Height | Area %  | Height % |
|-------|-----------|---------|--------|---------|----------|
| 1     | 6.194     | 4458044 | 325310 | 50.081  | 57.765   |
| 2     | 8.775     | 4443547 | 237854 | 49.919  | 42.235   |
| Total |           | 8901591 | 563164 | 100.000 | 100.000  |

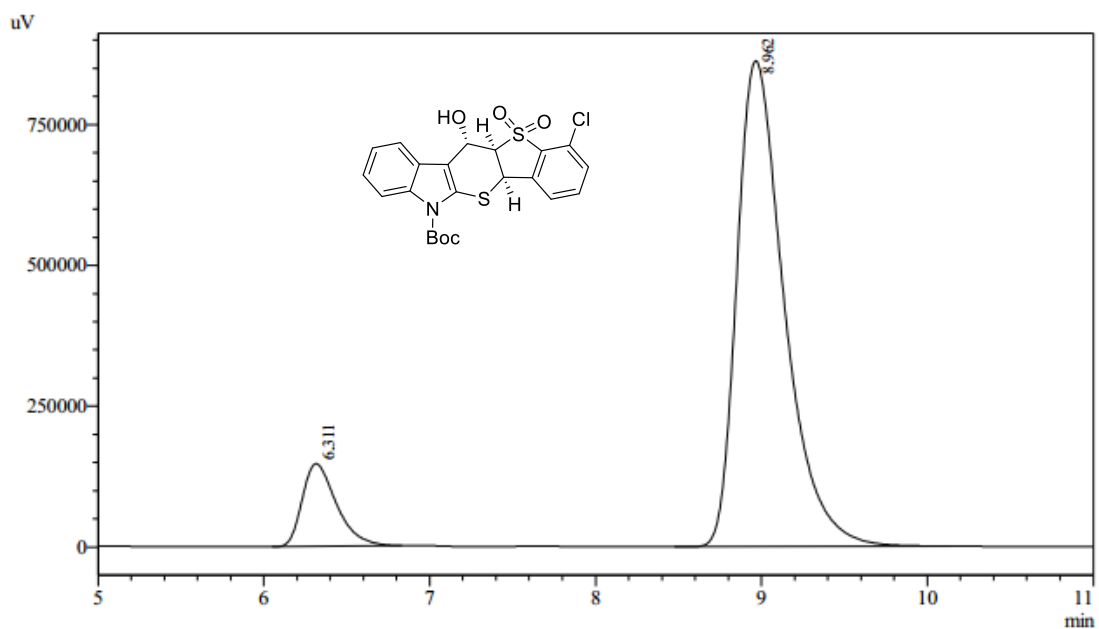

Detector A Ch1 254nm

| Peak# | Ret. Time | Area     | Height  | Area %  | Height % |
|-------|-----------|----------|---------|---------|----------|
| 1     | 6.311     | 2110071  | 146741  | 10.965  | 14.531   |
| 2     | 8.962     | 17133517 | 863099  | 89.035  | 85.469   |
| Total |           | 19243588 | 1009840 | 100.000 | 100.000  |

<sup>1</sup>H and <sup>13</sup>C NMR of **30**

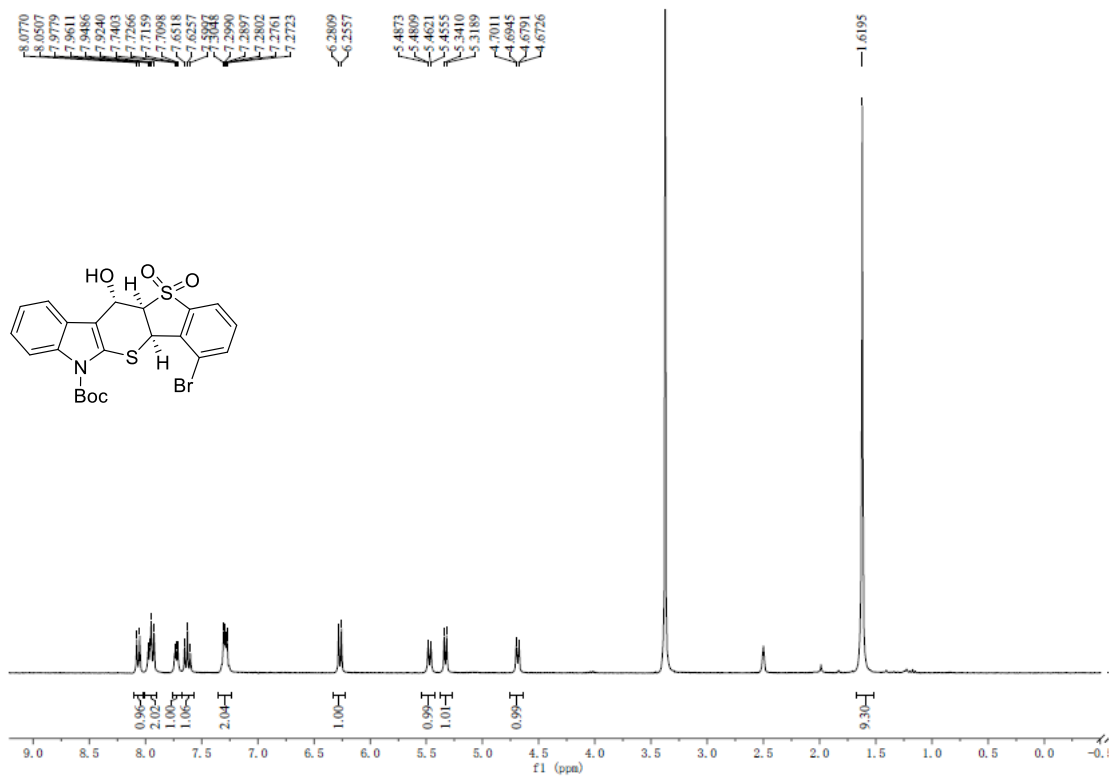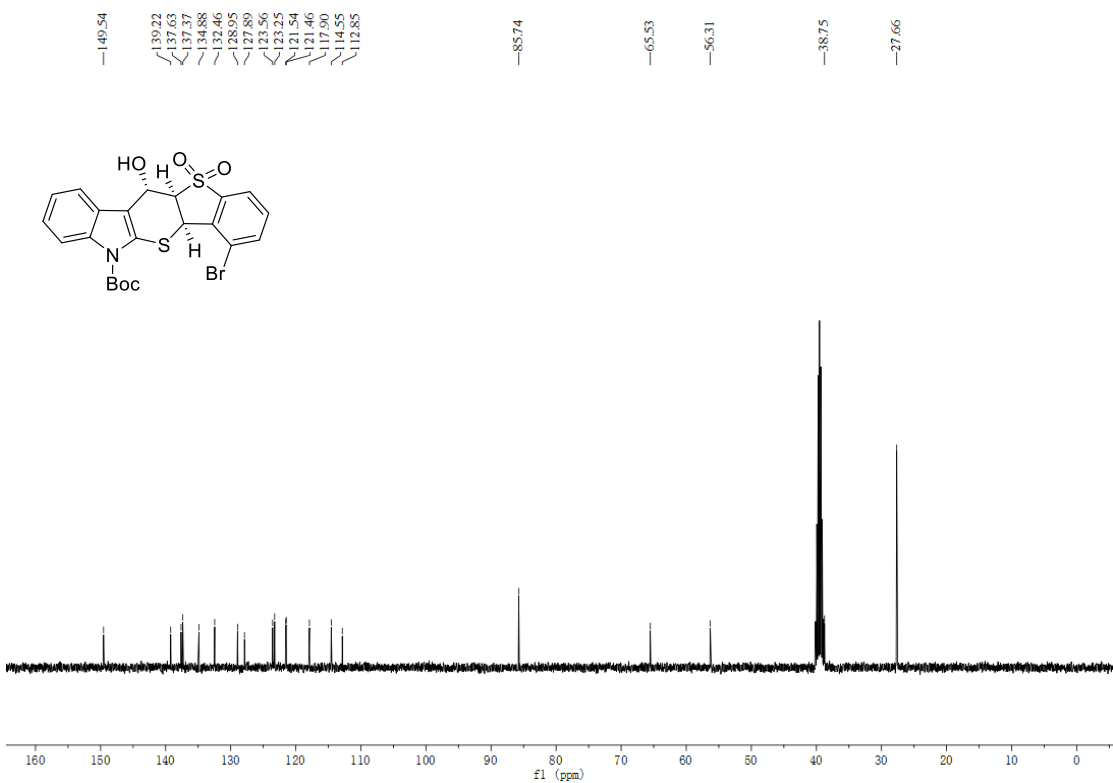

### HPLC of 3o

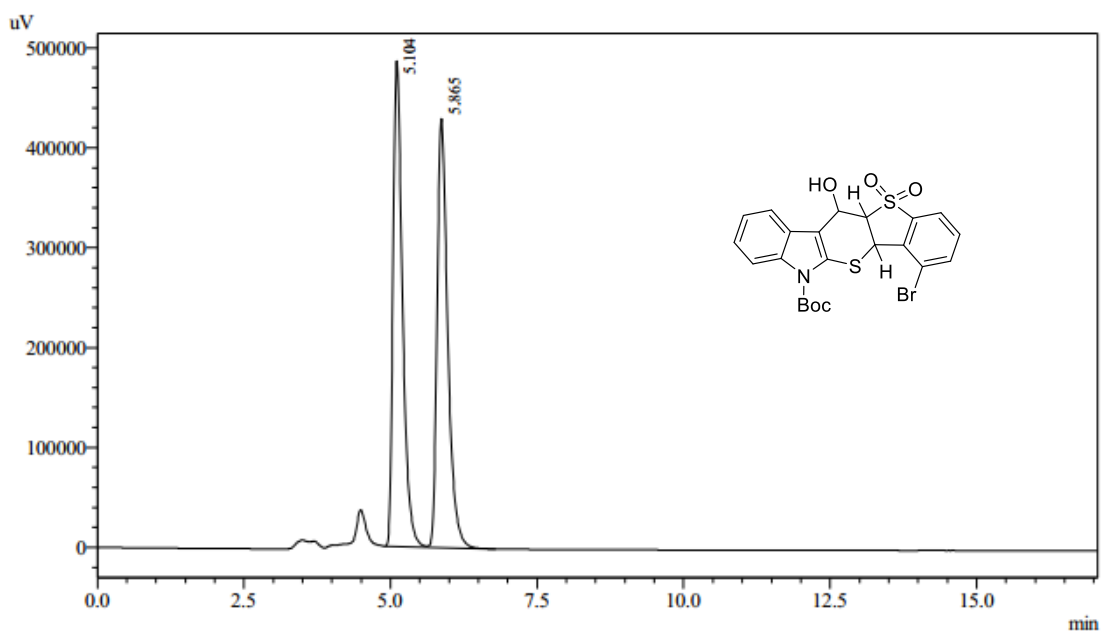

1 Det.A Ch1 / 254nm

Detector A Ch1 254nm

| Peak# | Ret. Time | Area     | Height | Area %  | Height % |
|-------|-----------|----------|--------|---------|----------|
| 1     | 5.104     | 5460255  | 486077 | 50.173  | 53.094   |
| 2     | 5.865     | 5422614  | 429427 | 49.827  | 46.906   |
| Total |           | 10882869 | 915504 | 100.000 | 100.000  |

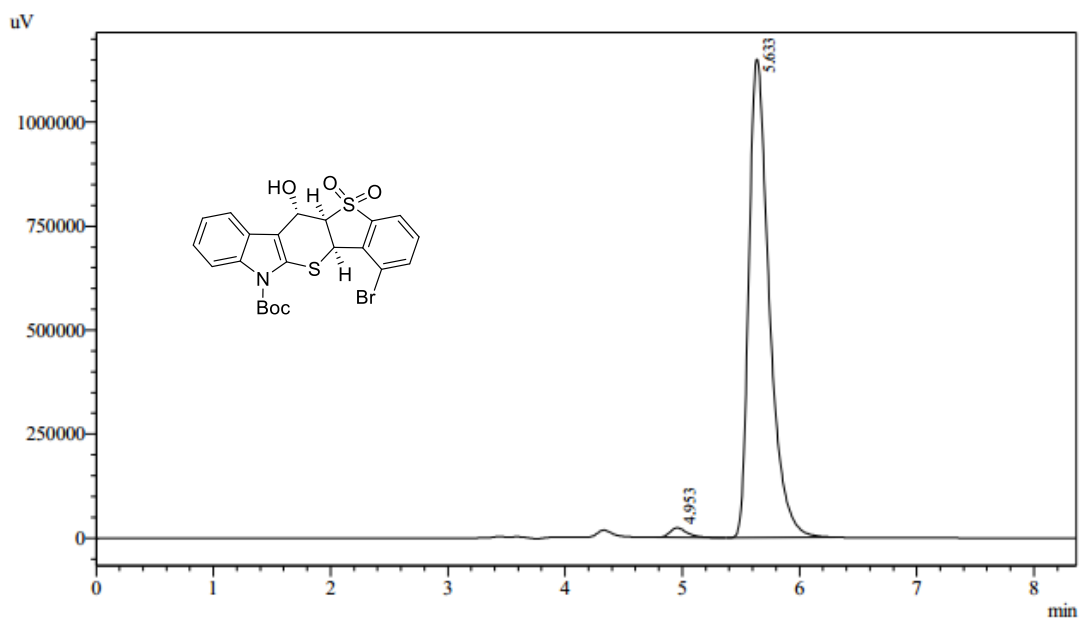

1 Det.A Ch1 / 254nm

Detector A Ch1 254nm

| Peak# | Ret. Time | Area     | Height  | Area %  | Height % |
|-------|-----------|----------|---------|---------|----------|
| 1     | 4.953     | 238799   | 23071   | 1.691   | 1.967    |
| 2     | 5.633     | 13879209 | 1149661 | 98.309  | 98.033   |
| Total |           | 14118008 | 1172732 | 100.000 | 100.000  |

# <sup>1</sup>H and <sup>13</sup>C NMR of 3p

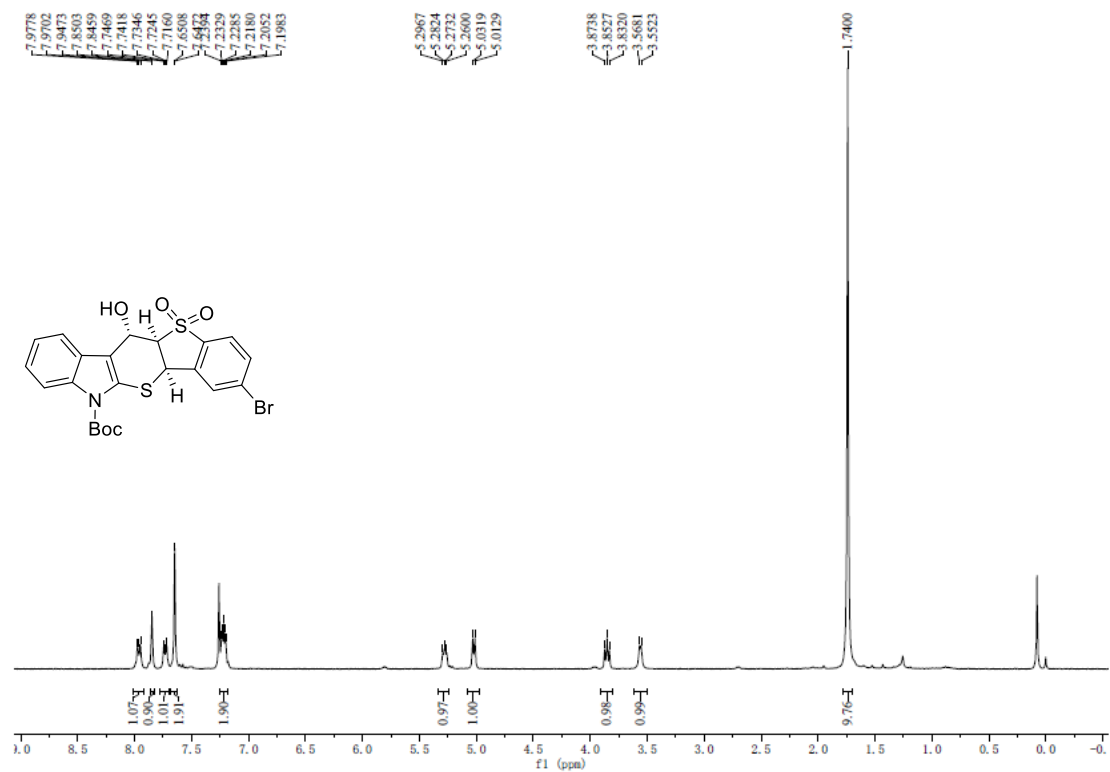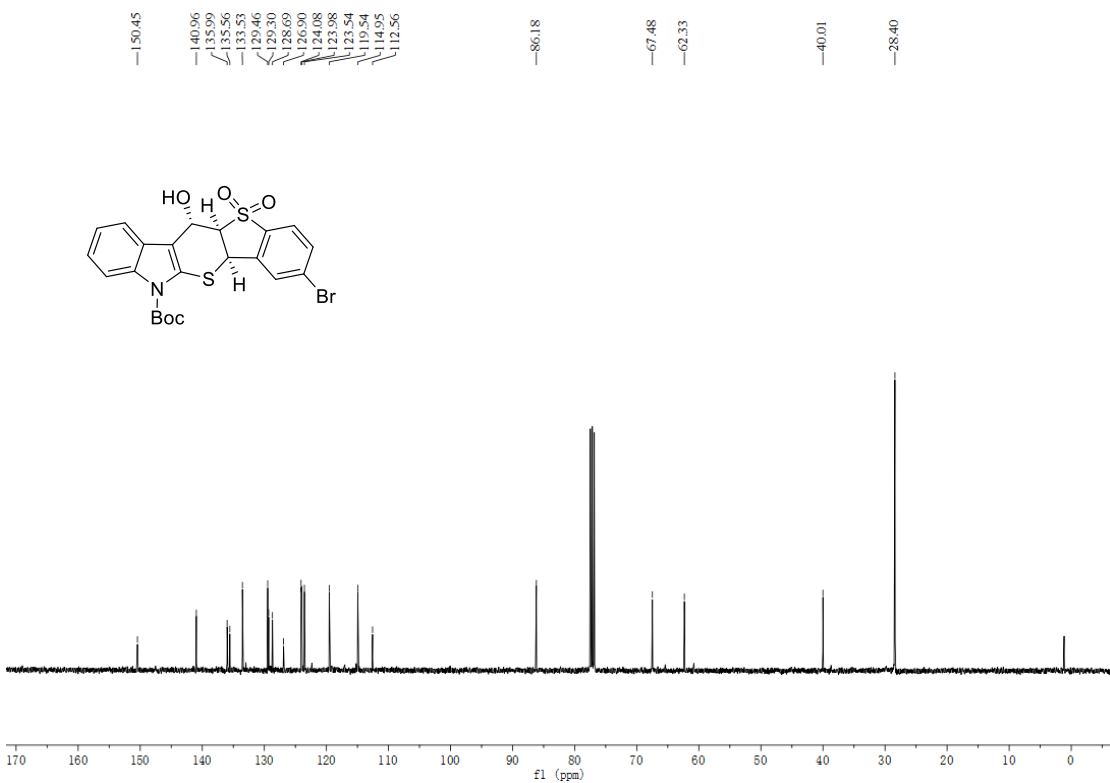

### HPLC of 3p

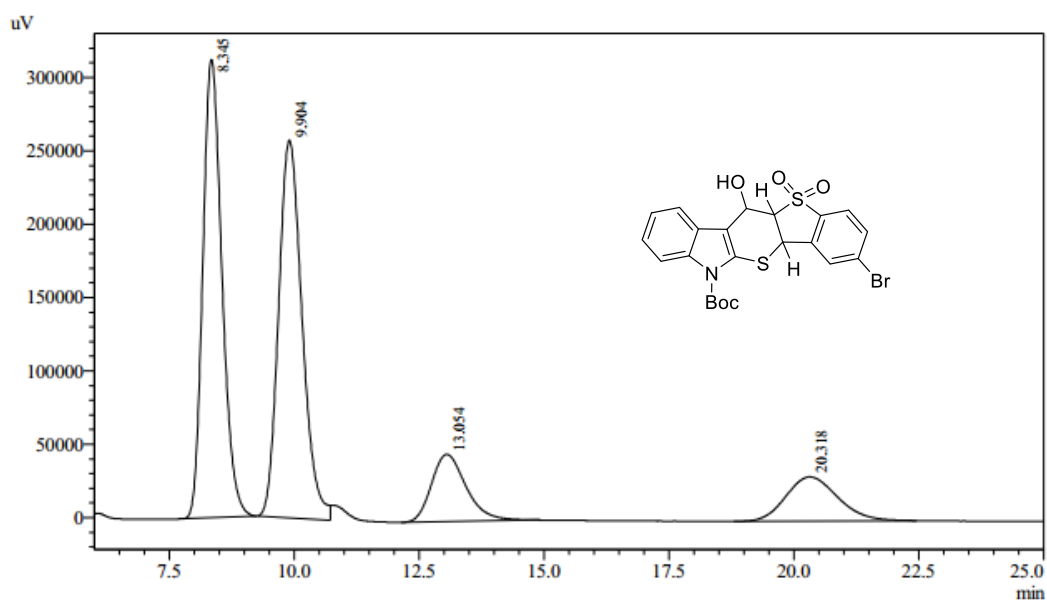

1 Det.A Ch1 / 254nm

Detector A Ch1 254nm

| Peak# | Ret. Time | Area     | Height | Area %  | Height % |
|-------|-----------|----------|--------|---------|----------|
| 1     | 8.345     | 8308634  | 312343 | 39.350  | 48.366   |
| 2     | 9.904     | 8406824  | 257426 | 39.815  | 39.862   |
| 3     | 13.054    | 2223246  | 45900  | 10.529  | 7.108    |
| 4     | 20.318    | 2175923  | 30119  | 10.305  | 4.664    |
| Total |           | 21114627 | 645788 | 100.000 | 100.000  |

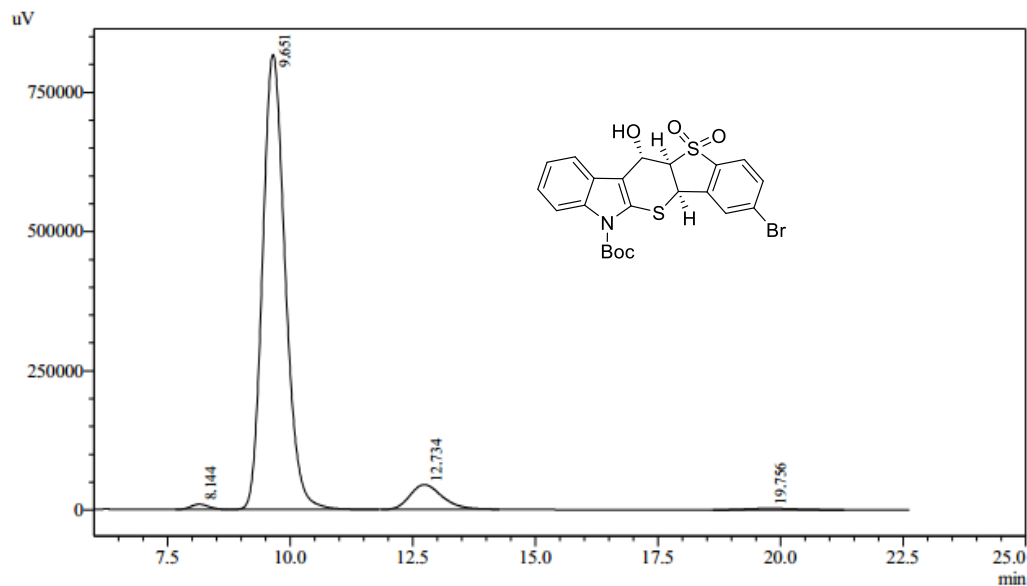

1 Det.A Ch1 / 254nm

Detector A Ch1 254nm

| Peak# | Ret. Time | Area     | Height | Area %  | Height % |
|-------|-----------|----------|--------|---------|----------|
| 1     | 8.144     | 230234   | 9193   | 0.806   | 1.053    |
| 2     | 9.651     | 26136261 | 817095 | 91.444  | 93.576   |
| 3     | 12.734    | 2043065  | 44366  | 7.148   | 5.081    |
| 4     | 19.756    | 172107   | 2537   | 0.602   | 0.291    |
| Total |           | 28581666 | 873191 | 100.000 | 100.000  |



<sup>1</sup>H and <sup>13</sup>C NMR of **3q**

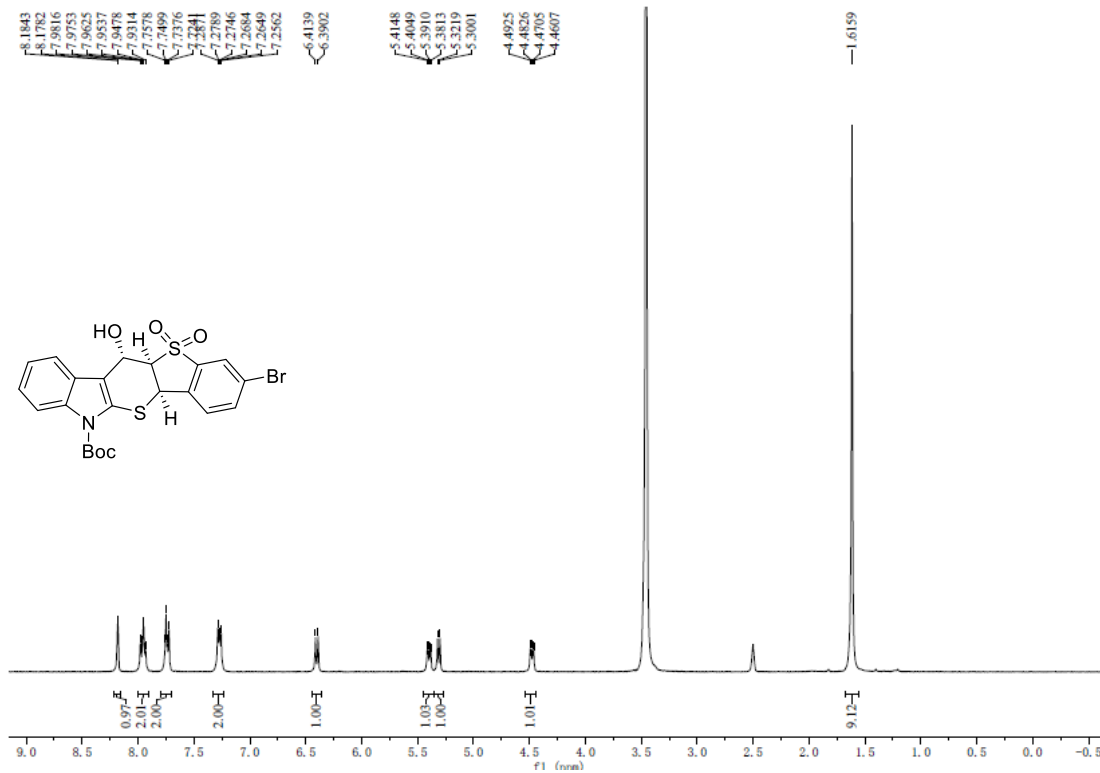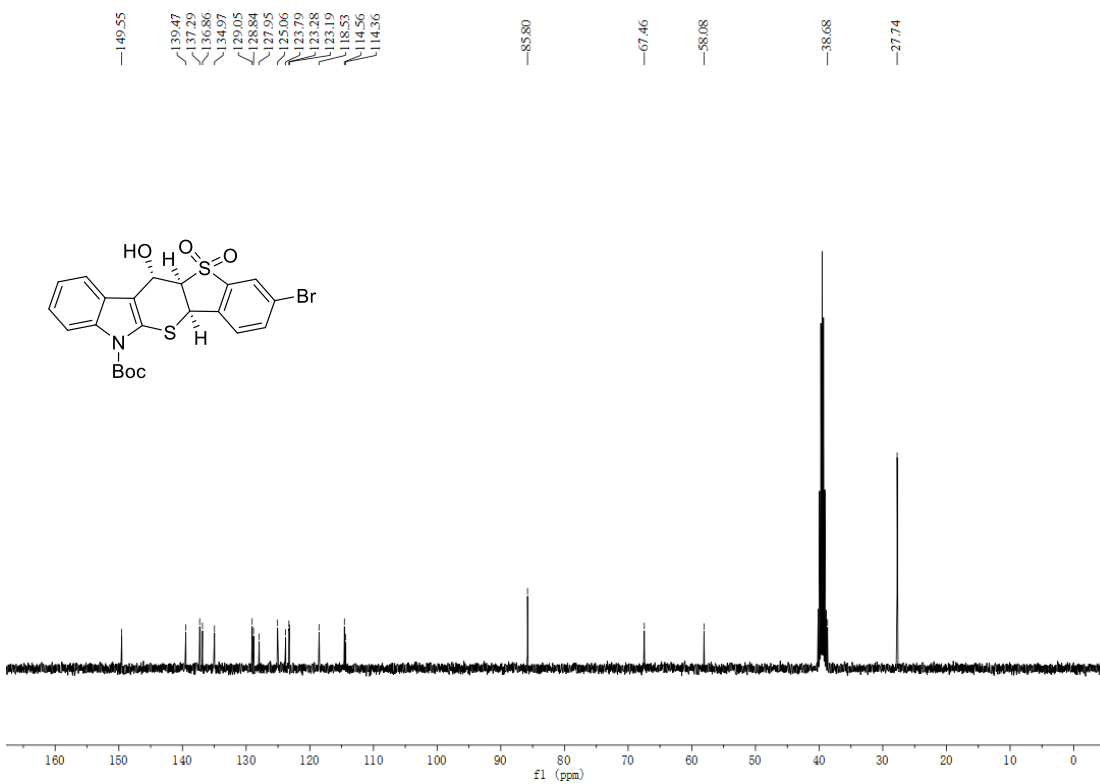

### HPLC of 3q

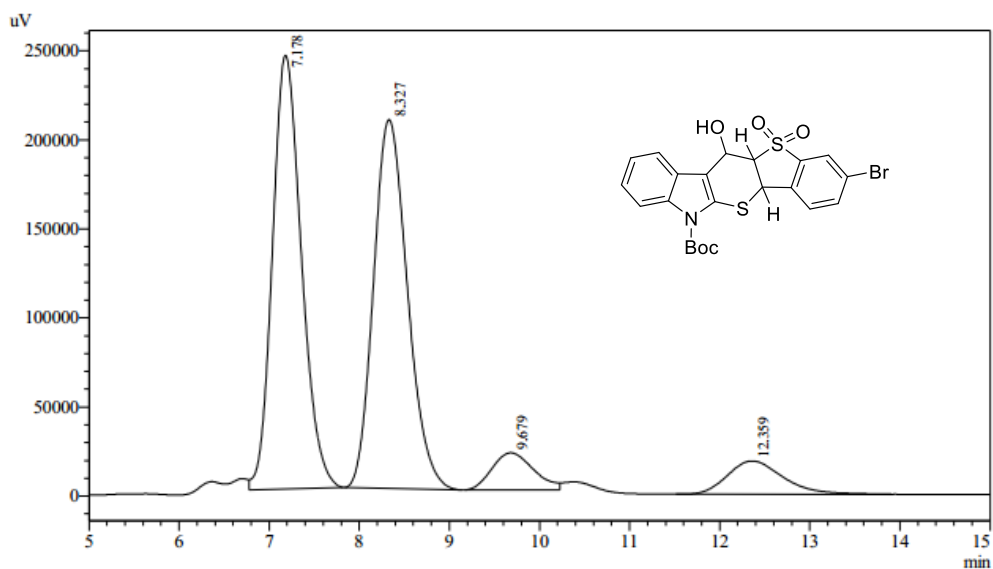

Detector A Ch1 254nm

| Peak# | Ret. Time | Area     | Height | Area %  | Height % |
|-------|-----------|----------|--------|---------|----------|
| 1     | 7.178     | 5459430  | 243691 | 44.153  | 49.674   |
| 2     | 8.327     | 5424887  | 207259 | 43.873  | 42.248   |
| 3     | 9.679     | 676556   | 20959  | 5.472   | 4.272    |
| 4     | 12.359    | 804038   | 18668  | 6.503   | 3.805    |
| Total |           | 12364911 | 490577 | 100.000 | 100.000  |

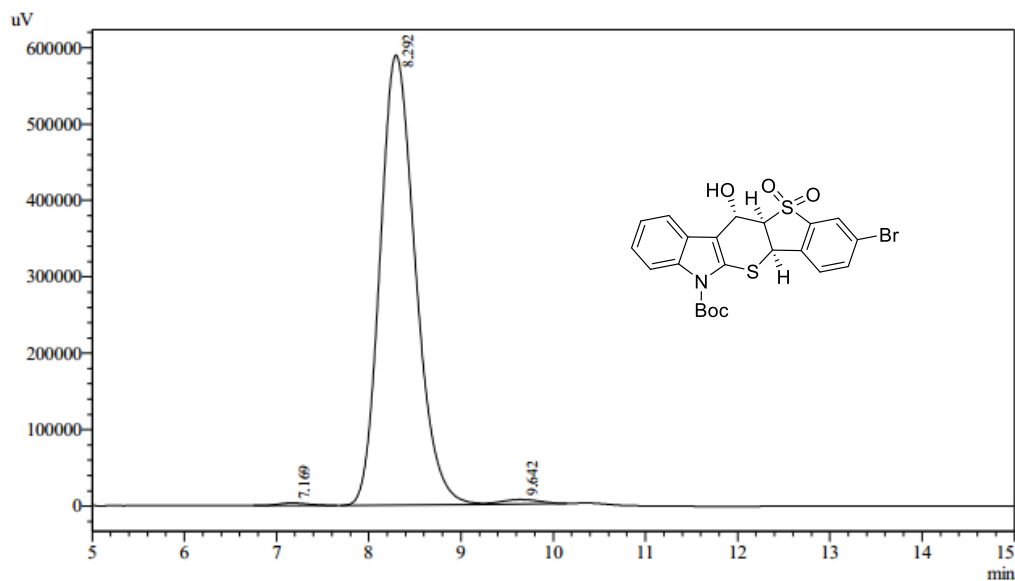

Detector A Ch1 254nm

| Peak# | Ret. Time | Area     | Height | Area %  | Height % |
|-------|-----------|----------|--------|---------|----------|
| 1     | 7.169     | 77272    | 3484   | 0.485   | 0.582    |
| 2     | 8.292     | 15684797 | 588907 | 98.471  | 98.456   |
| 3     | 9.642     | 166193   | 5753   | 1.043   | 0.962    |
| Total |           | 15928262 | 598144 | 100.000 | 100.000  |

<sup>1</sup>H and <sup>13</sup>C NMR of **3r**

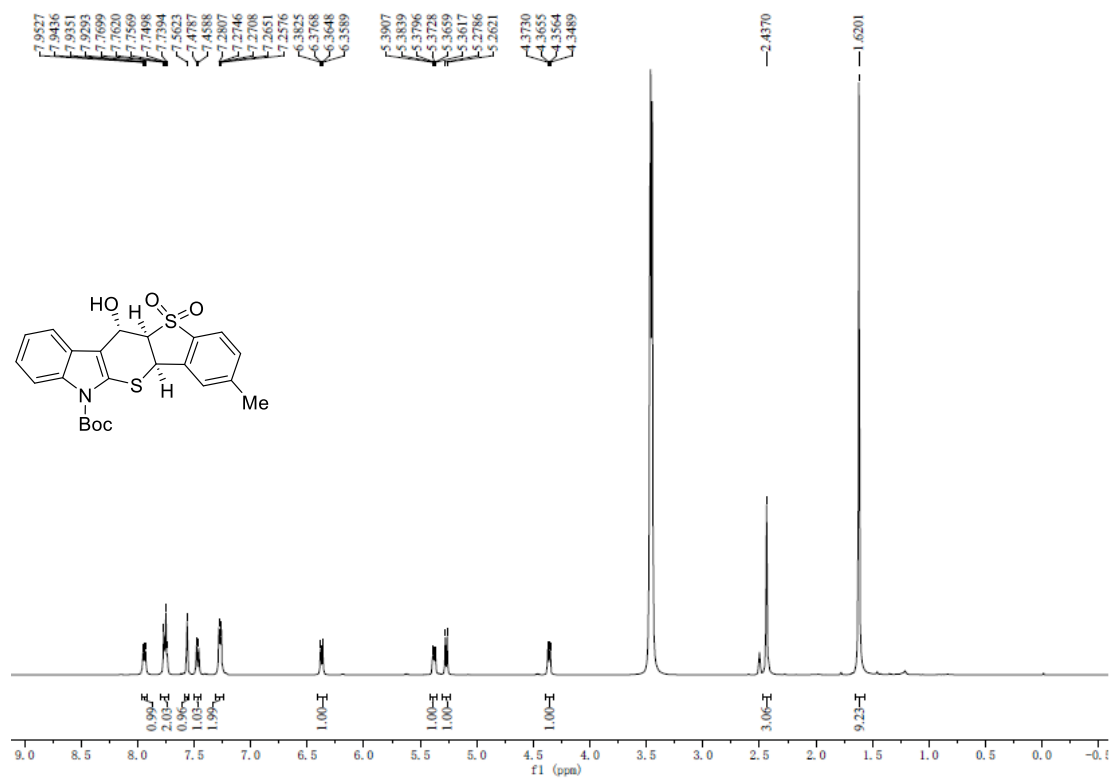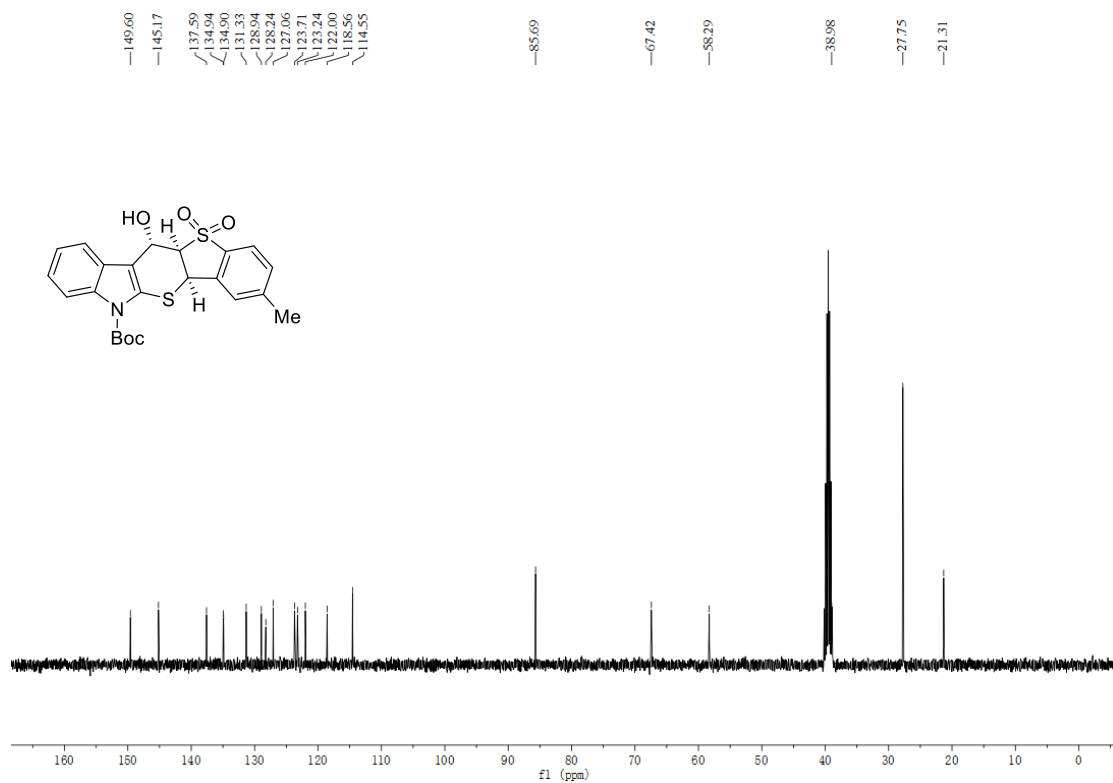

### HPLC of 3r

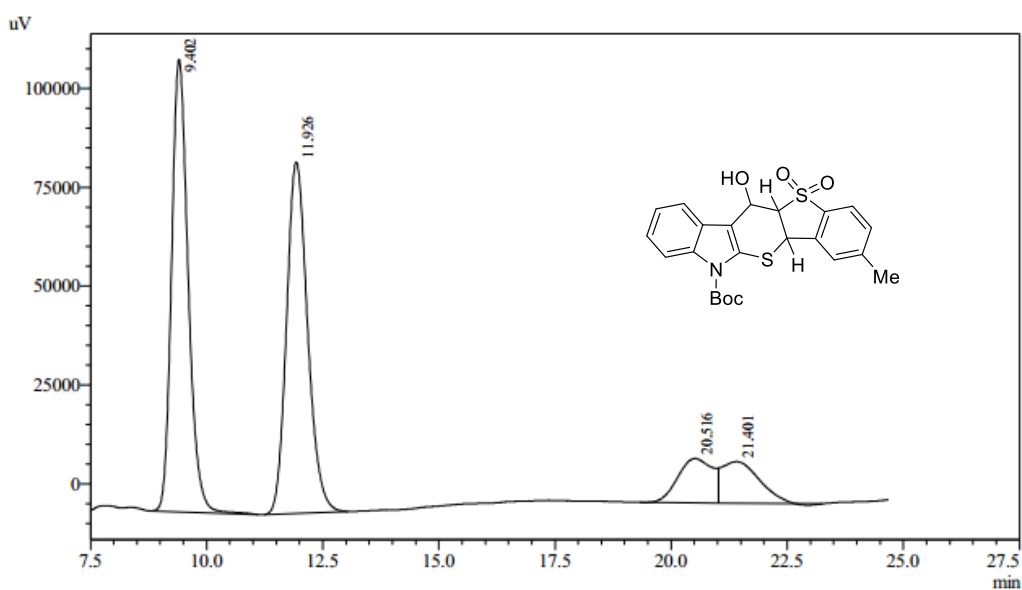

Detector A Ch1 254nm

| Peak# | Ret. Time | Area    | Height | Area %  | Height % |
|-------|-----------|---------|--------|---------|----------|
| 1     | 9.402     | 2841963 | 114432 | 41.730  | 50.842   |
| 2     | 11.926    | 2798472 | 88943  | 41.091  | 39.517   |
| 3     | 20.516    | 589758  | 11193  | 8.660   | 4.973    |
| 4     | 21.401    | 580174  | 10507  | 8.519   | 4.668    |
| Total |           | 6810367 | 225075 | 100.000 | 100.000  |

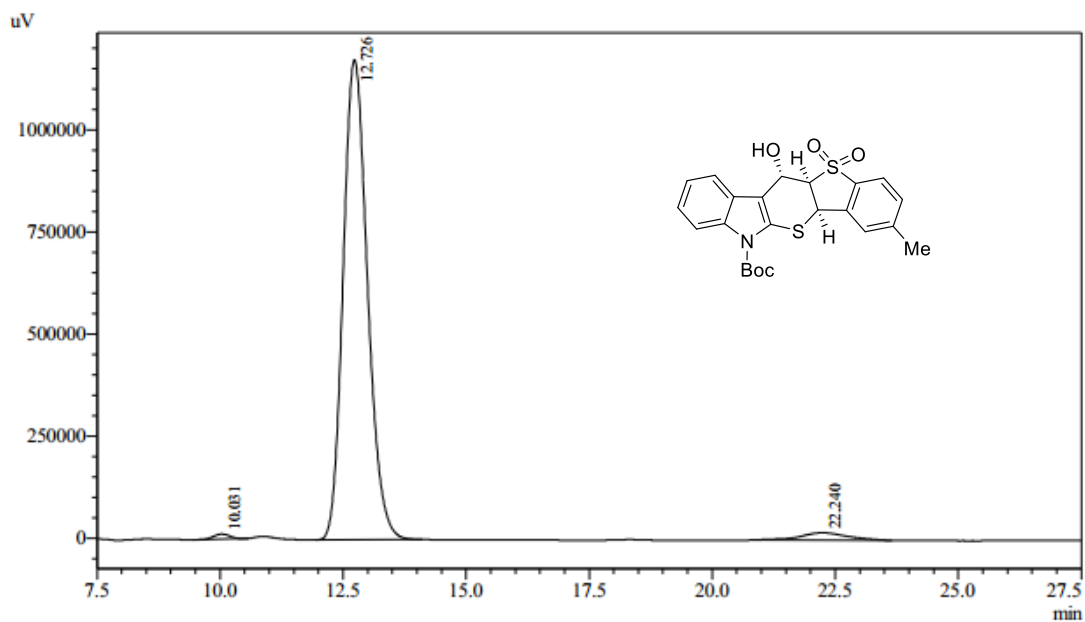

Detector A Ch1 254nm

| Peak# | Ret. Time | Area     | Height  | Area %  | Height % |
|-------|-----------|----------|---------|---------|----------|
| 1     | 10.031    | 273470   | 12342   | 0.653   | 1.023    |
| 2     | 12.726    | 40331075 | 1175247 | 96.312  | 97.452   |
| 3     | 22.240    | 1270956  | 18382   | 3.035   | 1.524    |
| Total |           | 41875502 | 1205972 | 100.000 | 100.000  |

<sup>1</sup>H and <sup>13</sup>C NMR of 3s

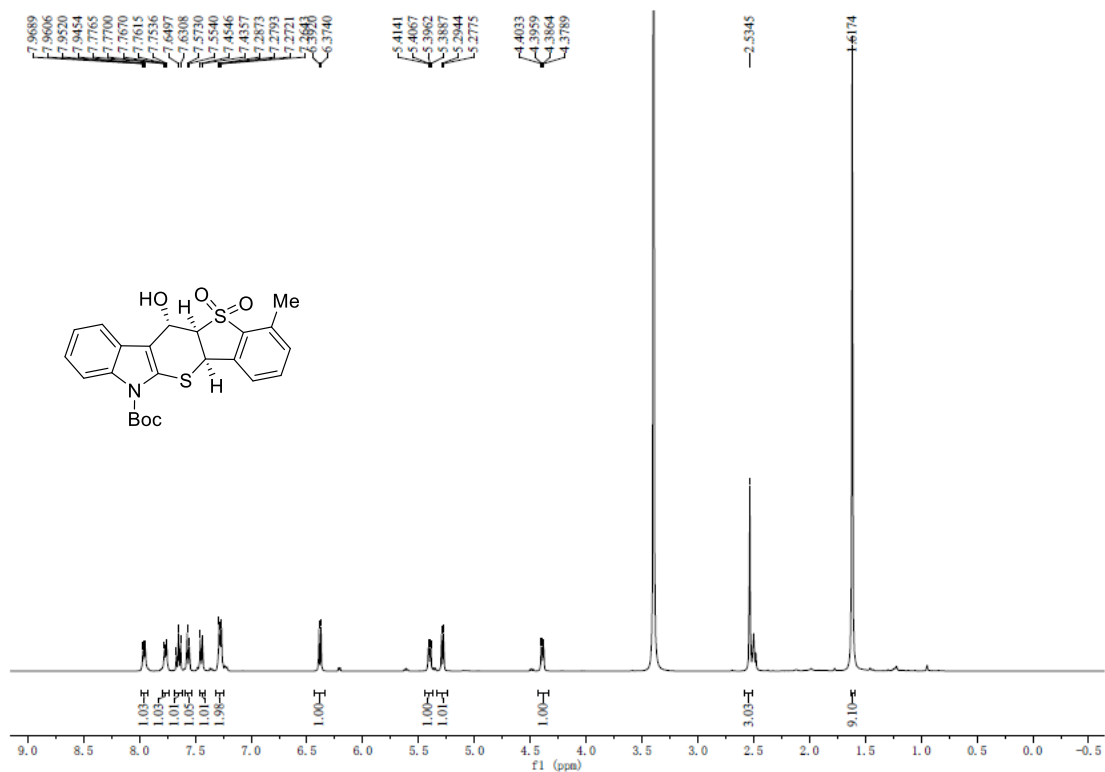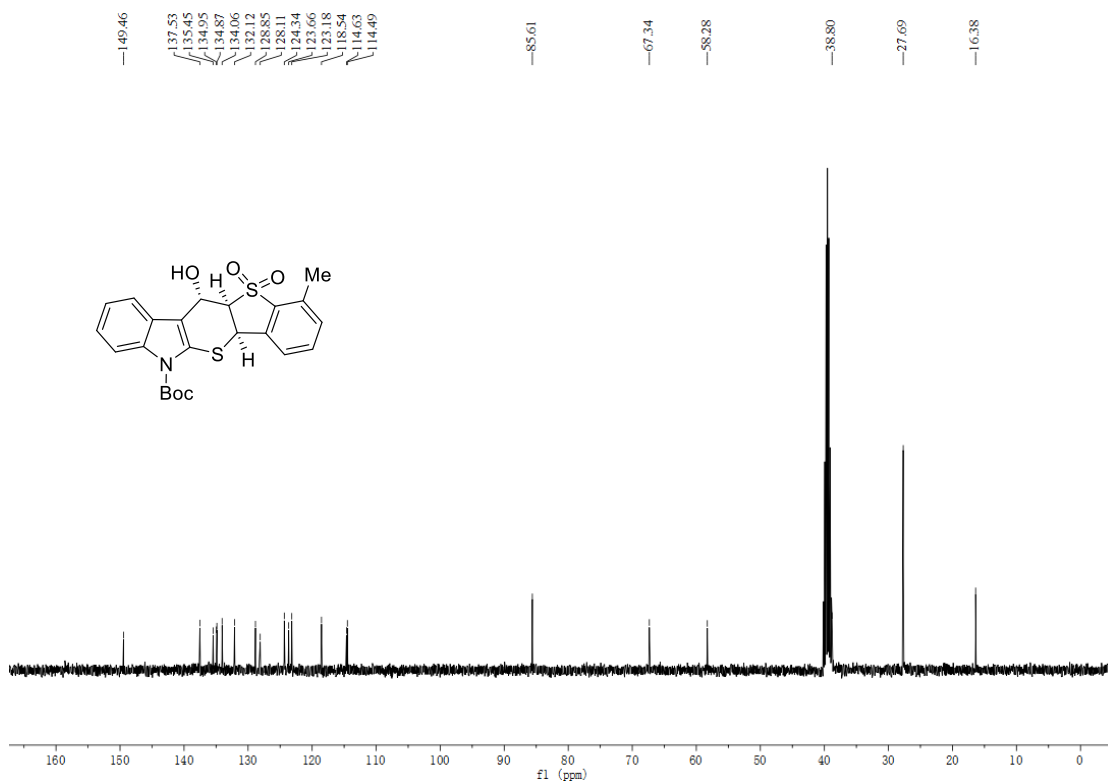

### HPLC of 3s

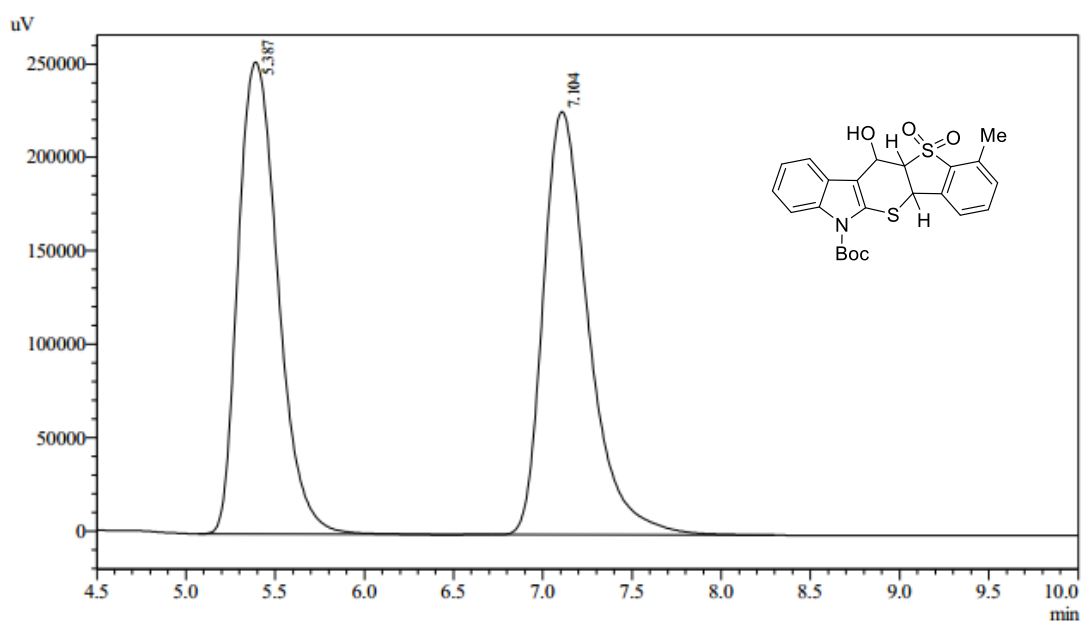

1 Det.A Ch1 / 254nm

Detector A Ch1 254nm

| Peak# | Ret. Time | Area    | Height | Area %  | Height % |
|-------|-----------|---------|--------|---------|----------|
| 1     | 5.387     | 3924728 | 252691 | 49.471  | 52.718   |
| 2     | 7.104     | 4008677 | 226634 | 50.529  | 47.282   |
| Total |           | 7933405 | 479326 | 100.000 | 100.000  |

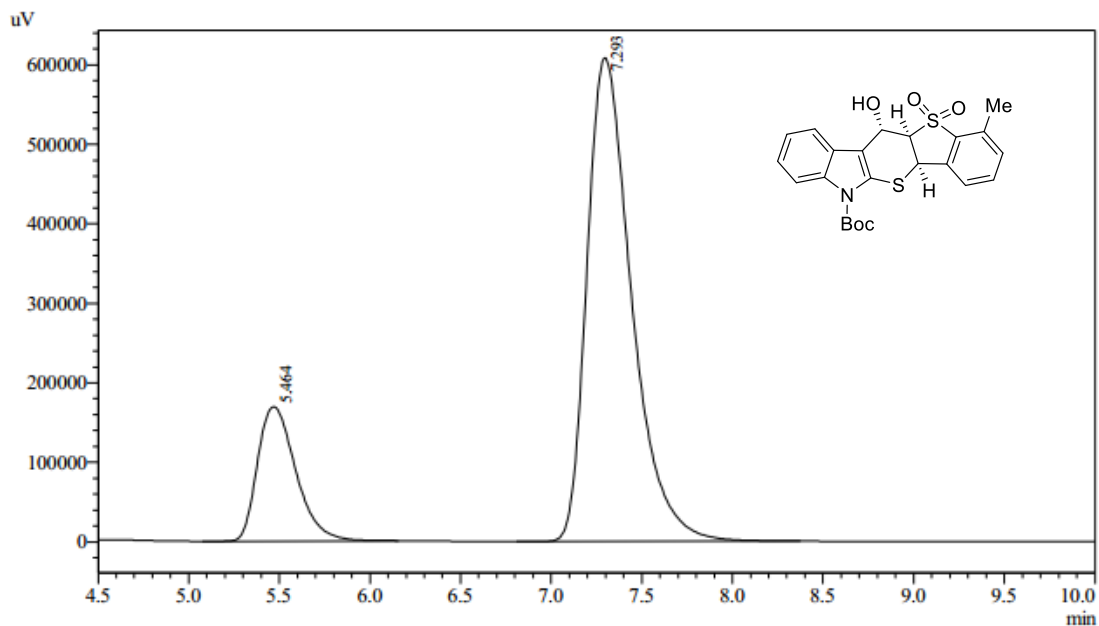

1 Det.A Ch1 / 254nm

Detector A Ch1 254nm

| Peak# | Ret. Time | Area     | Height | Area %  | Height % |
|-------|-----------|----------|--------|---------|----------|
| 1     | 5.464     | 2492659  | 168991 | 19.301  | 21.737   |
| 2     | 7.293     | 10422109 | 608451 | 80.699  | 78.263   |
| Total |           | 12914768 | 777442 | 100.000 | 100.000  |

<sup>1</sup>H and <sup>13</sup>C NMR of 3t

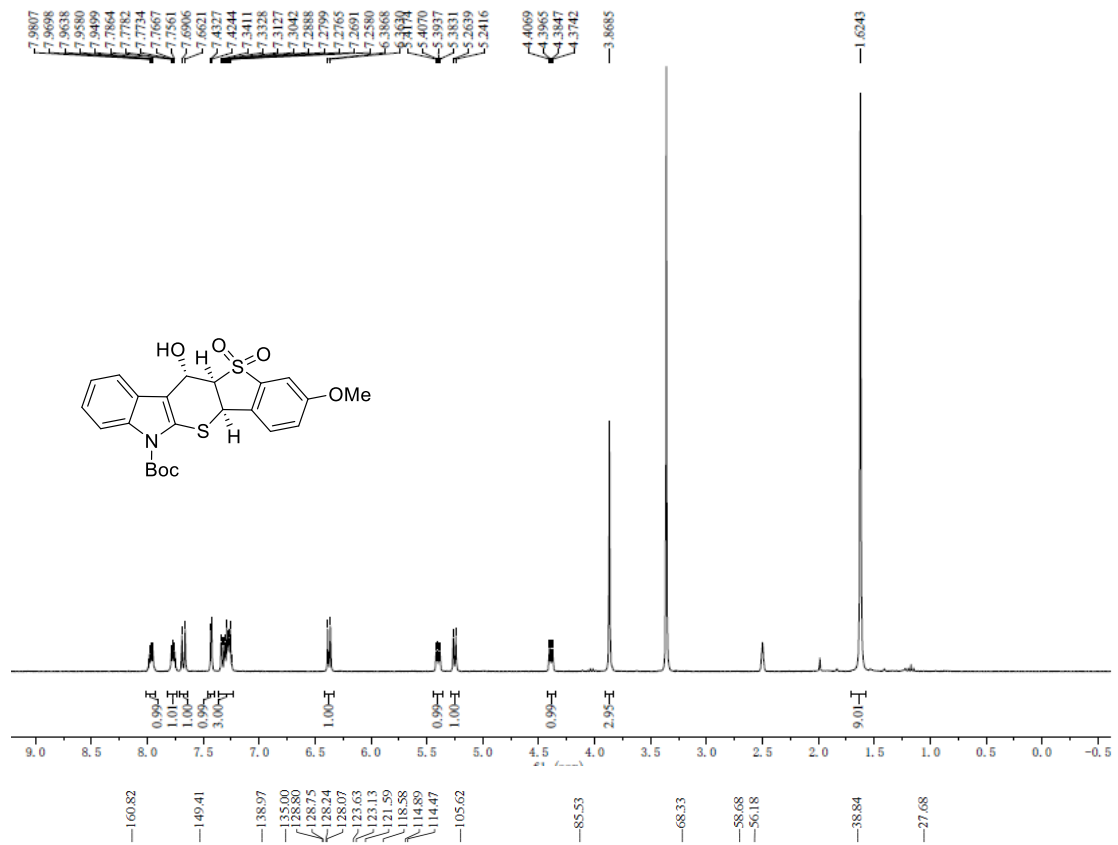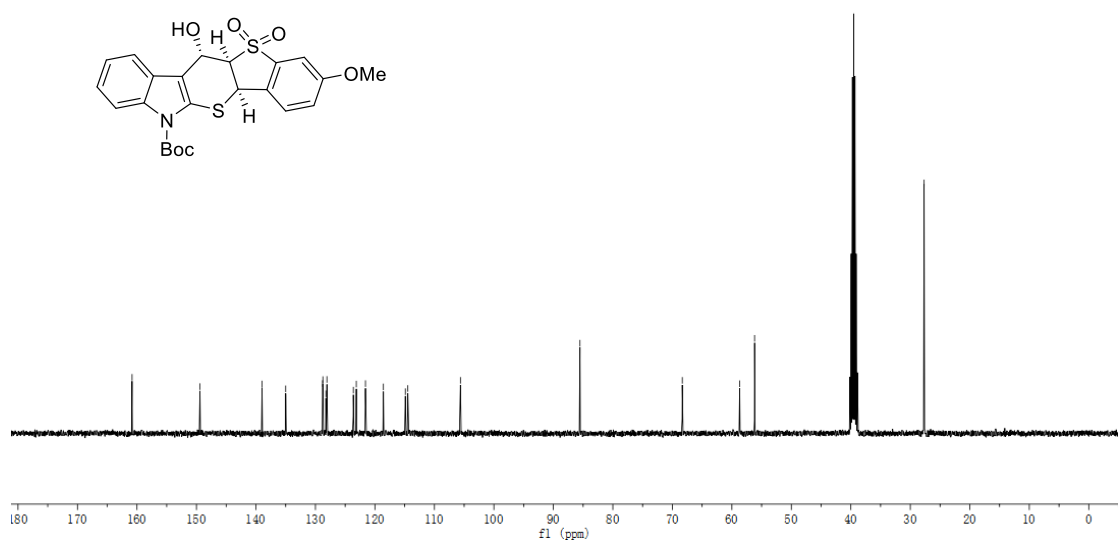

### HPLC of 3t

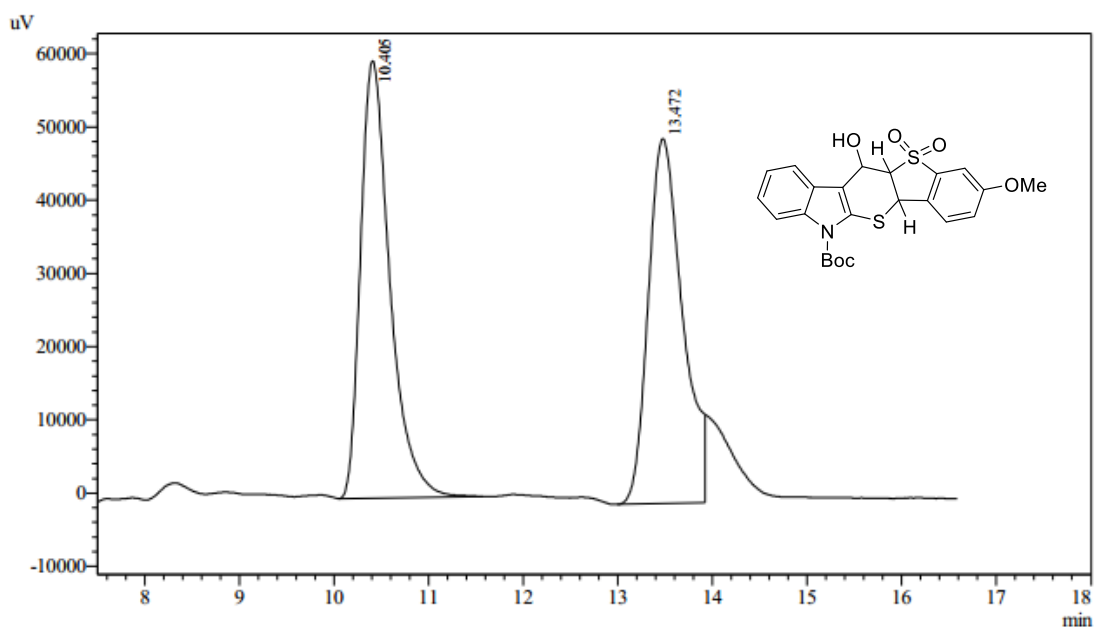

Detector A Ch1 254nm

| Peak# | Ret. Time | Area    | Height | Area %  | Height % |
|-------|-----------|---------|--------|---------|----------|
| 1     | 10.405    | 1289100 | 59714  | 50.590  | 54.505   |
| 2     | 13.472    | 1259053 | 49843  | 49.410  | 45.495   |
| Total |           | 2548152 | 109557 | 100.000 | 100.000  |

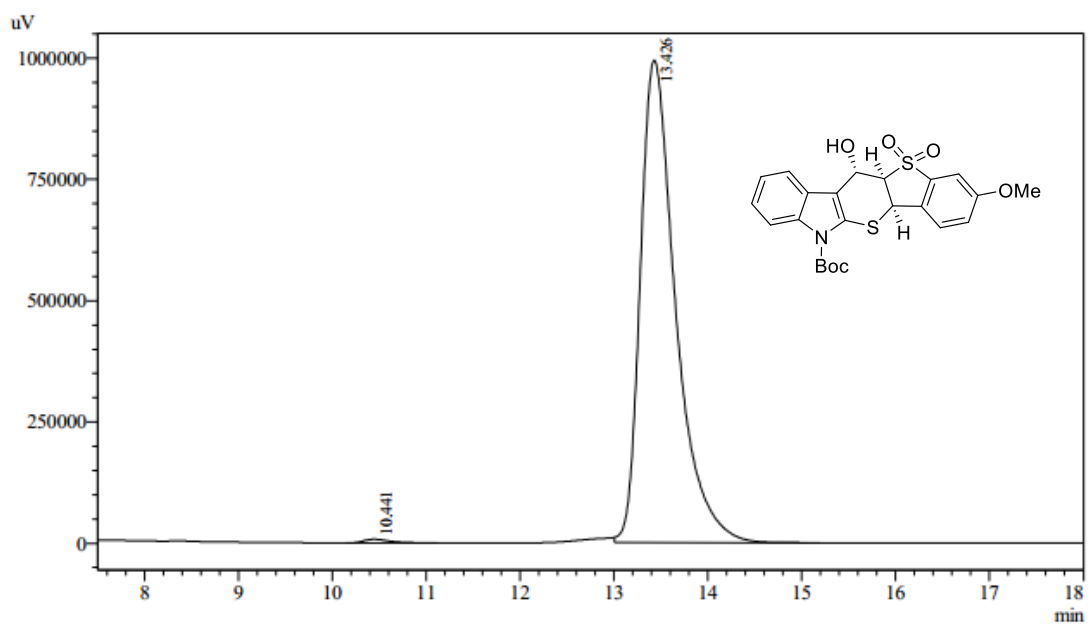

Detector A Ch1 254nm

| Peak# | Ret. Time | Area     | Height  | Area %  | Height % |
|-------|-----------|----------|---------|---------|----------|
| 1     | 10.441    | 158660   | 7892    | 0.607   | 0.788    |
| 2     | 13.426    | 25961766 | 993987  | 99.393  | 99.212   |
| Total |           | 26120426 | 1001880 | 100.000 | 100.000  |



# <sup>1</sup>H and <sup>13</sup>C NMR of **3u**

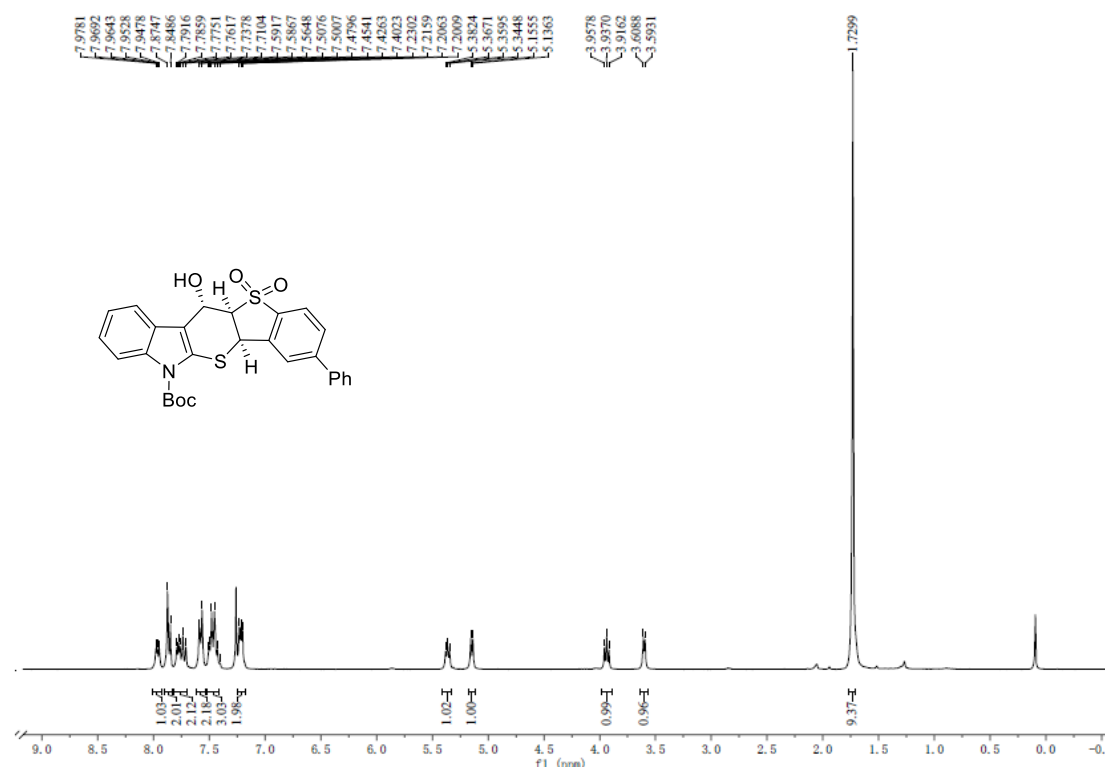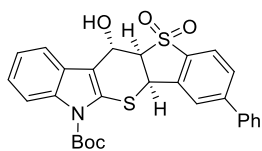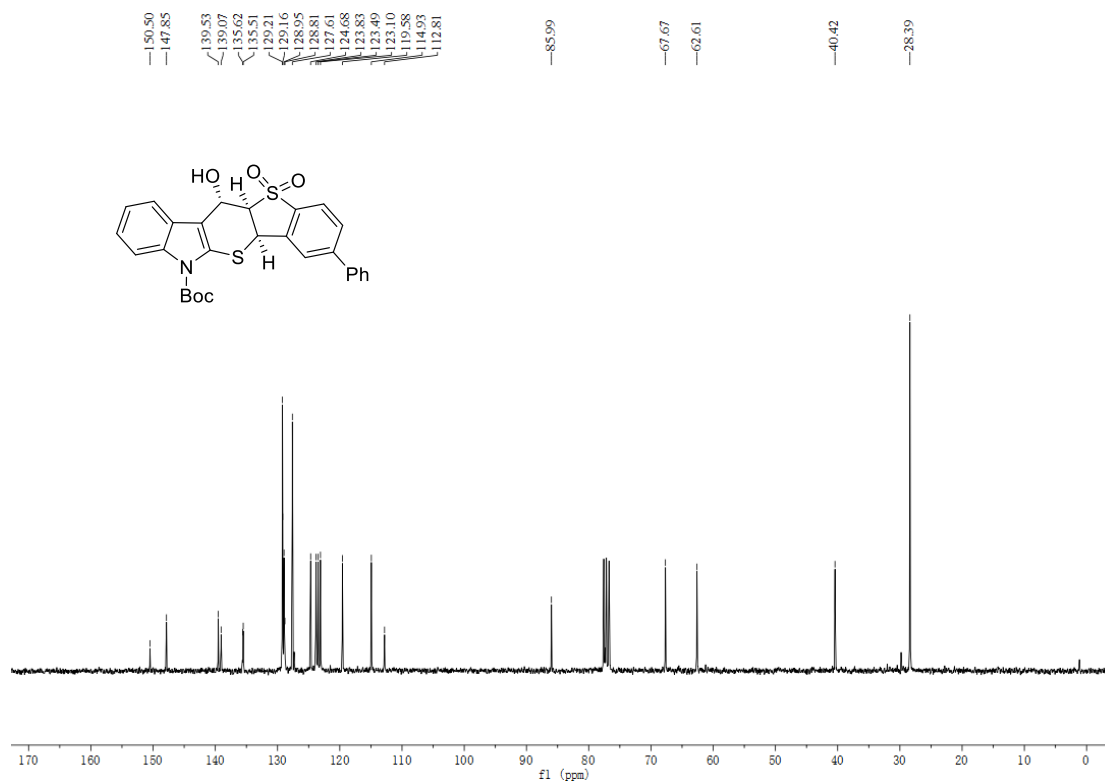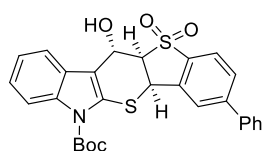

### HPLC of 3u

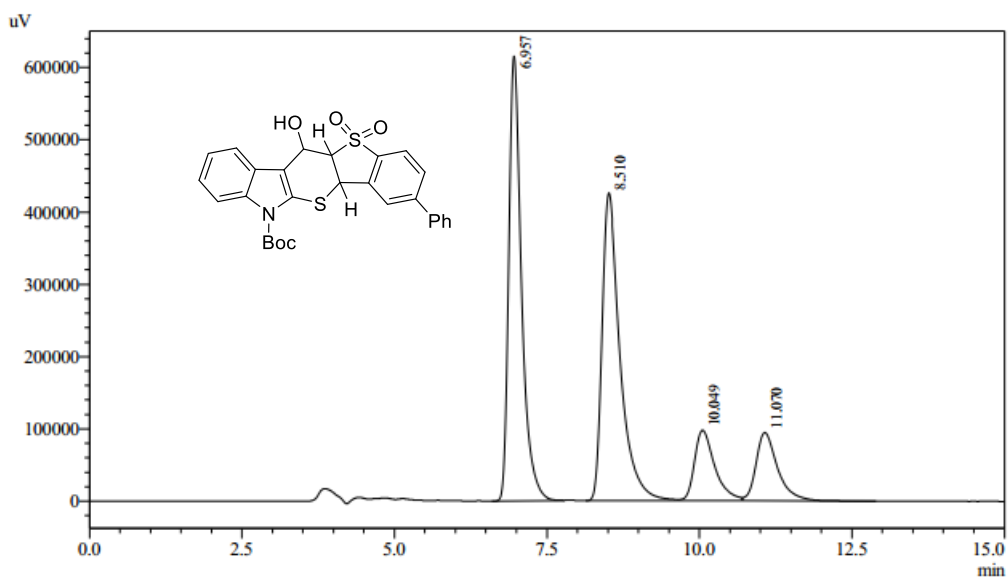

Detector A Ch1 254nm

| Peak# | Ret. Time | Area     | Height  | Area %  | Height % |
|-------|-----------|----------|---------|---------|----------|
| 1     | 6.957     | 8846532  | 615479  | 39.810  | 49.902   |
| 2     | 8.510     | 8808694  | 425697  | 39.640  | 34.515   |
| 3     | 10.049    | 2248321  | 97712   | 10.118  | 7.922    |
| 4     | 11.070    | 2318211  | 94495   | 10.432  | 7.661    |
| Total |           | 22221758 | 1233383 | 100.000 | 100.000  |

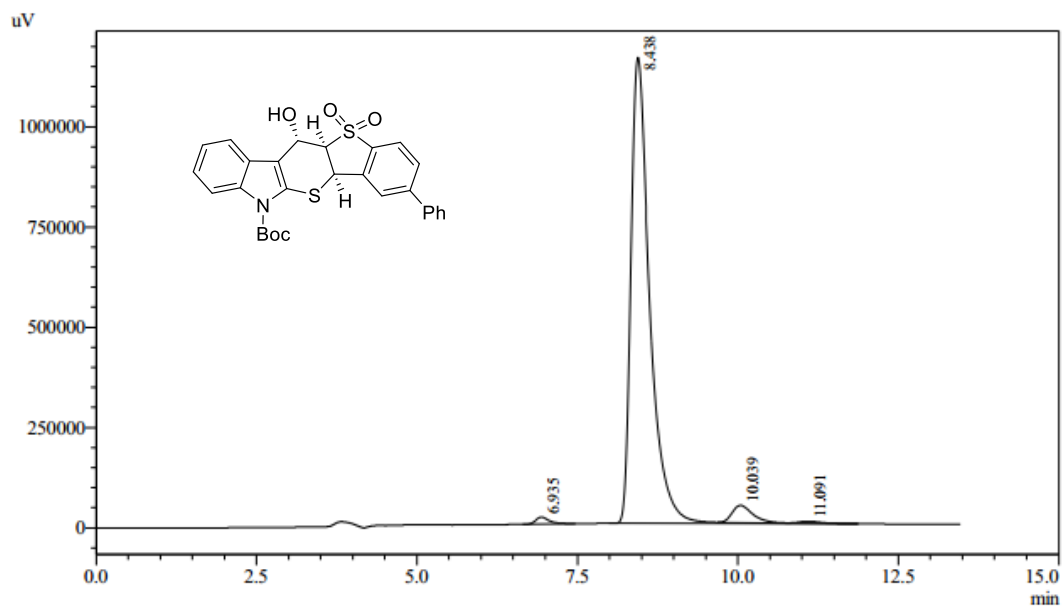

Detector A Ch1 254nm

| Peak# | Ret. Time | Area     | Height  | Area %  | Height % |
|-------|-----------|----------|---------|---------|----------|
| 1     | 6.935     | 263569   | 17763   | 1.044   | 1.447    |
| 2     | 8.438     | 23921493 | 1161649 | 94.720  | 94.644   |
| 3     | 10.039    | 952020   | 42952   | 3.770   | 3.499    |
| 4     | 11.091    | 117850   | 5030    | 0.467   | 0.410    |
| Total |           | 25254933 | 1227393 | 100.000 | 100.000  |

<sup>1</sup>H and <sup>13</sup>C NMR of **3v**

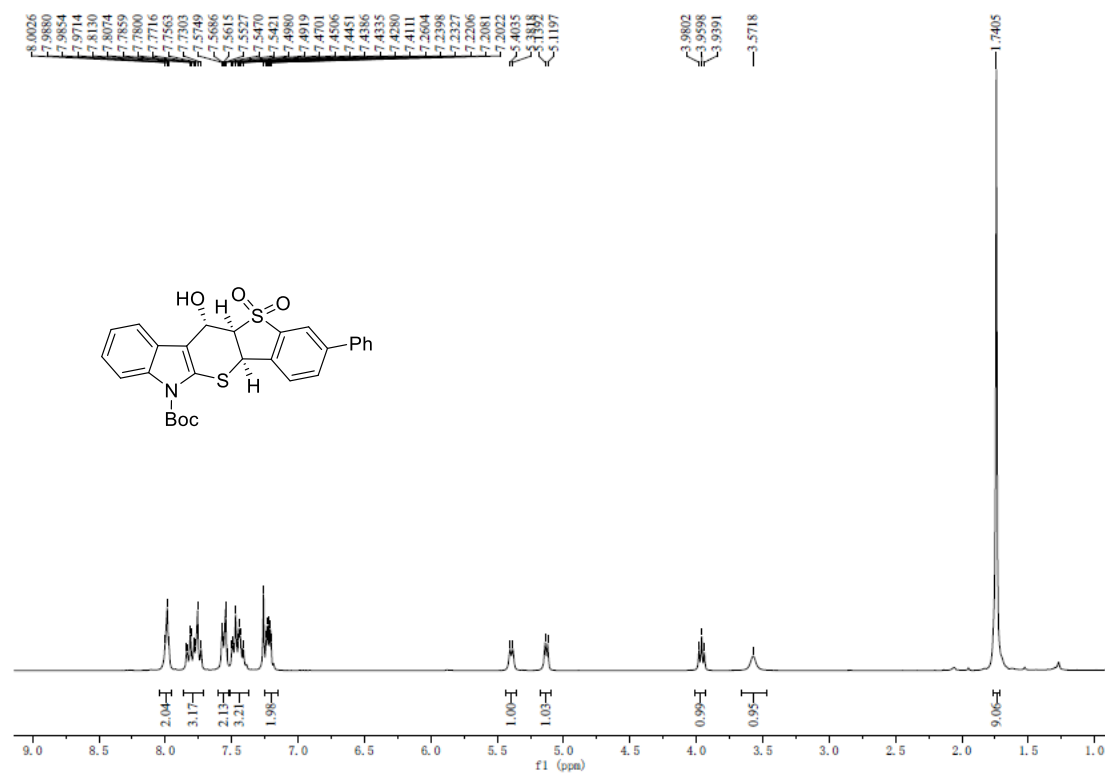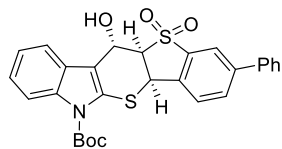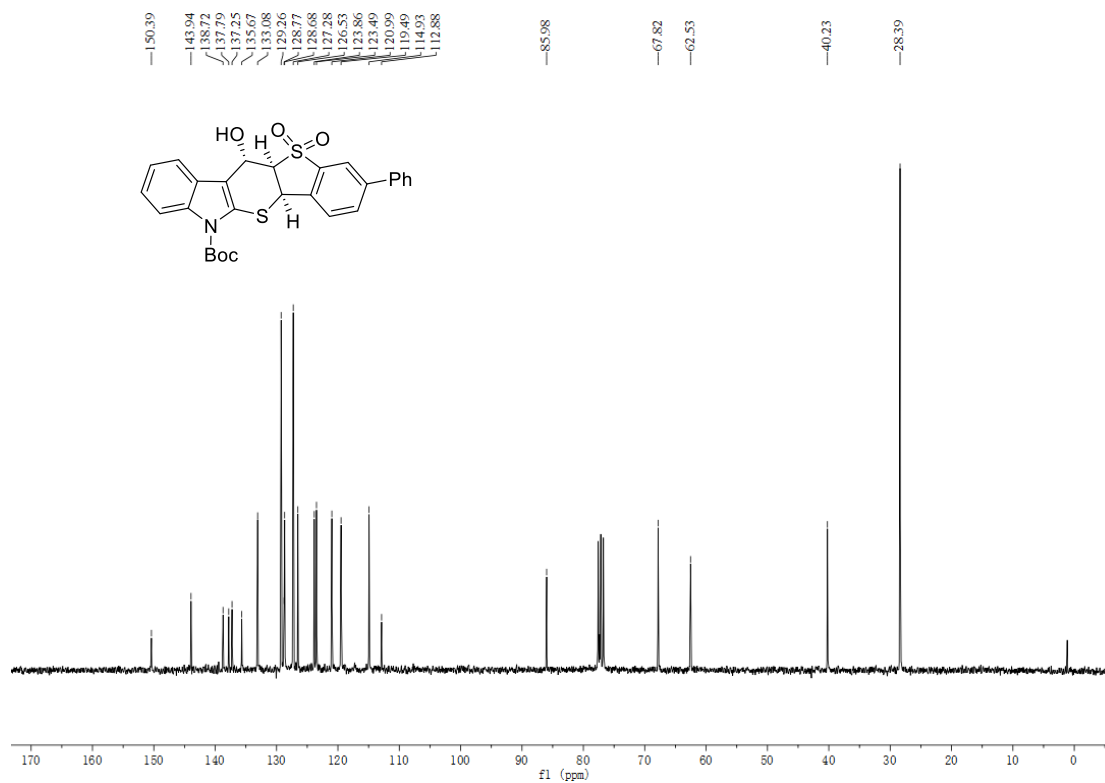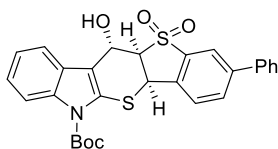

### HPLC of 3v

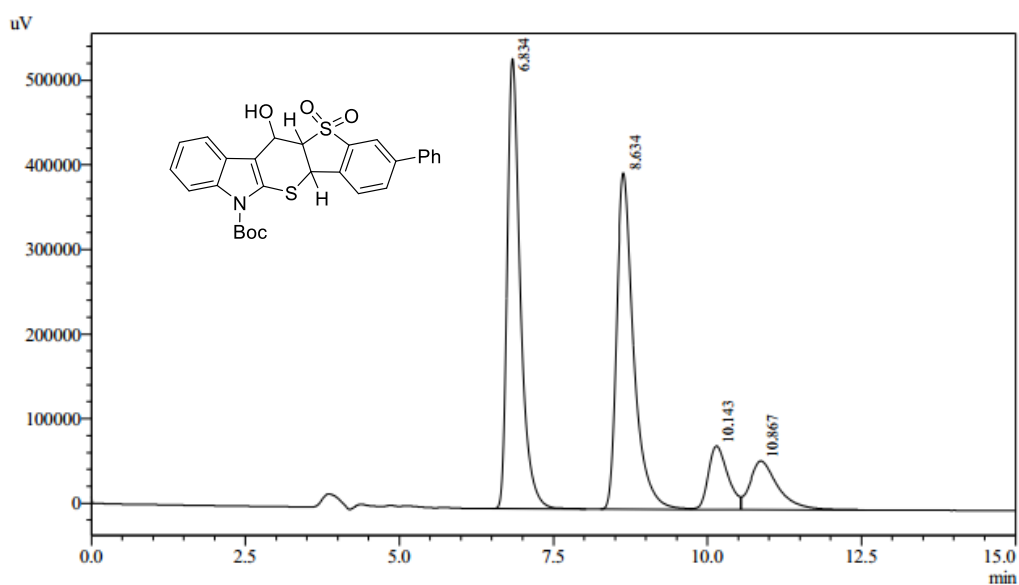

Detector A Ch1 254nm

| Peak# | Ret. Time | Area     | Height  | Area %  | Height % |
|-------|-----------|----------|---------|---------|----------|
| 1     | 6.834     | 7780202  | 531716  | 40.985  | 50.064   |
| 2     | 8.634     | 7721476  | 397714  | 40.676  | 37.447   |
| 3     | 10.143    | 1659487  | 75101   | 8.742   | 7.071    |
| 4     | 10.867    | 1821900  | 57535   | 9.598   | 5.417    |
| Total |           | 18983066 | 1062066 | 100.000 | 100.000  |

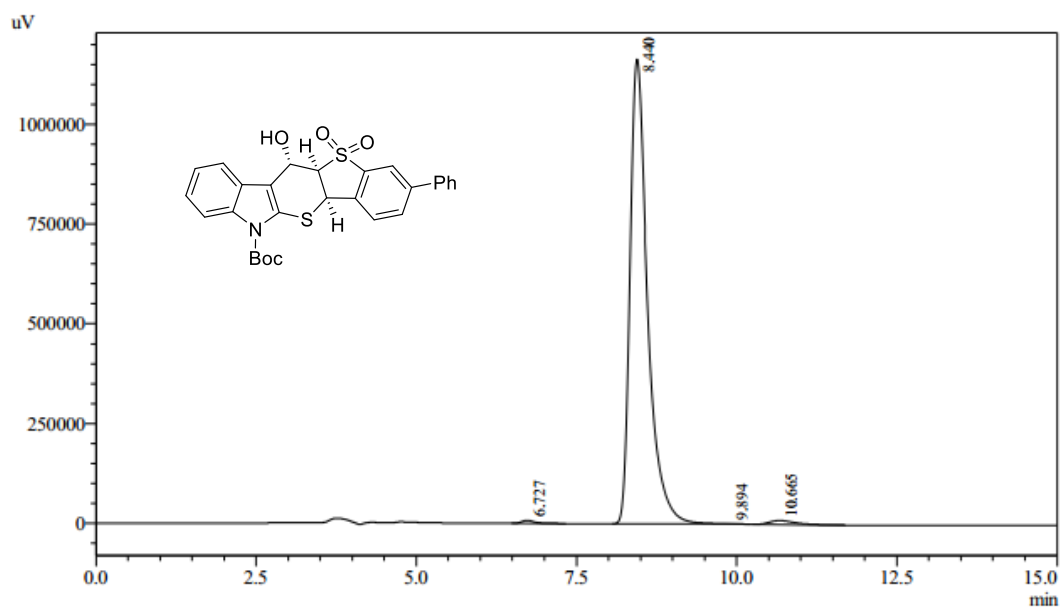

Detector A Ch1 254nm

| Peak# | Ret. Time | Area     | Height  | Area %  | Height % |
|-------|-----------|----------|---------|---------|----------|
| 1     | 6.727     | 117828   | 7805    | 0.519   | 0.660    |
| 2     | 8.440     | 22293564 | 1164354 | 98.213  | 98.475   |
| 3     | 9.894     | 5726     | 267     | 0.025   | 0.023    |
| 4     | 10.665    | 282154   | 9963    | 1.243   | 0.843    |
| Total |           | 22699273 | 1182389 | 100.000 | 100.000  |

<sup>1</sup>H and <sup>13</sup>C NMR of **5a**

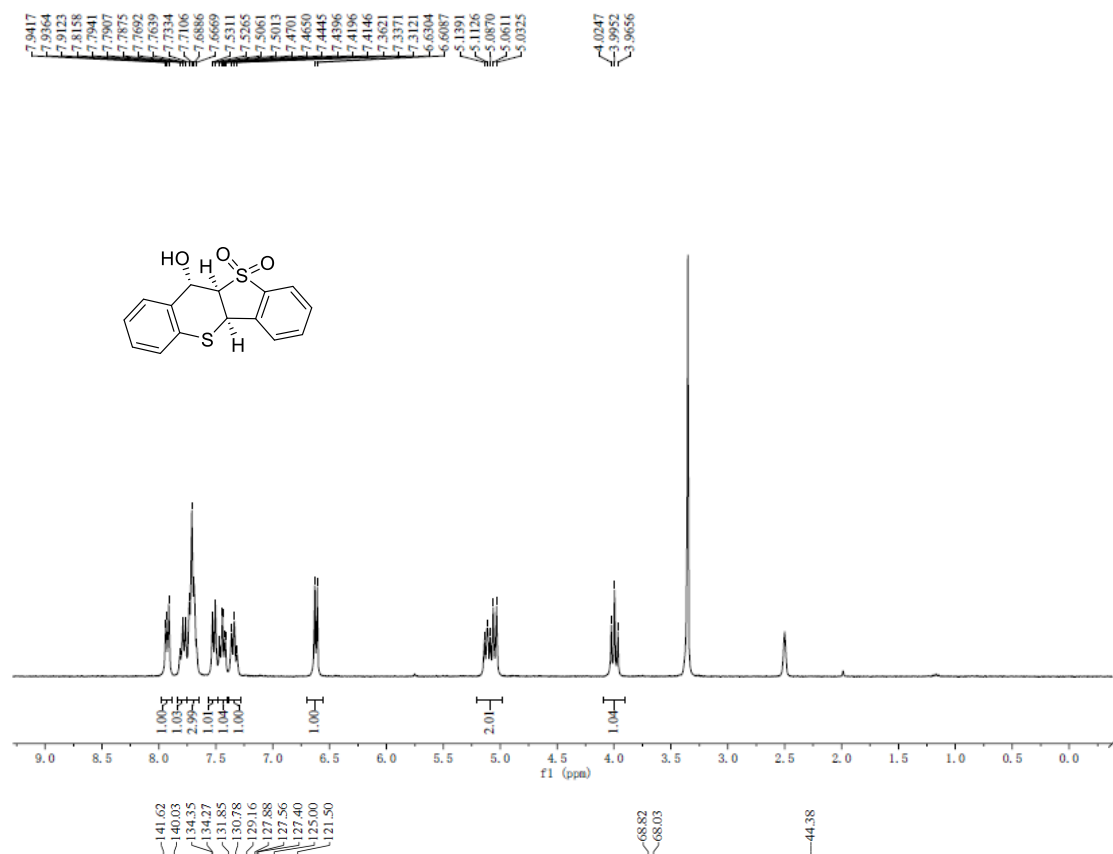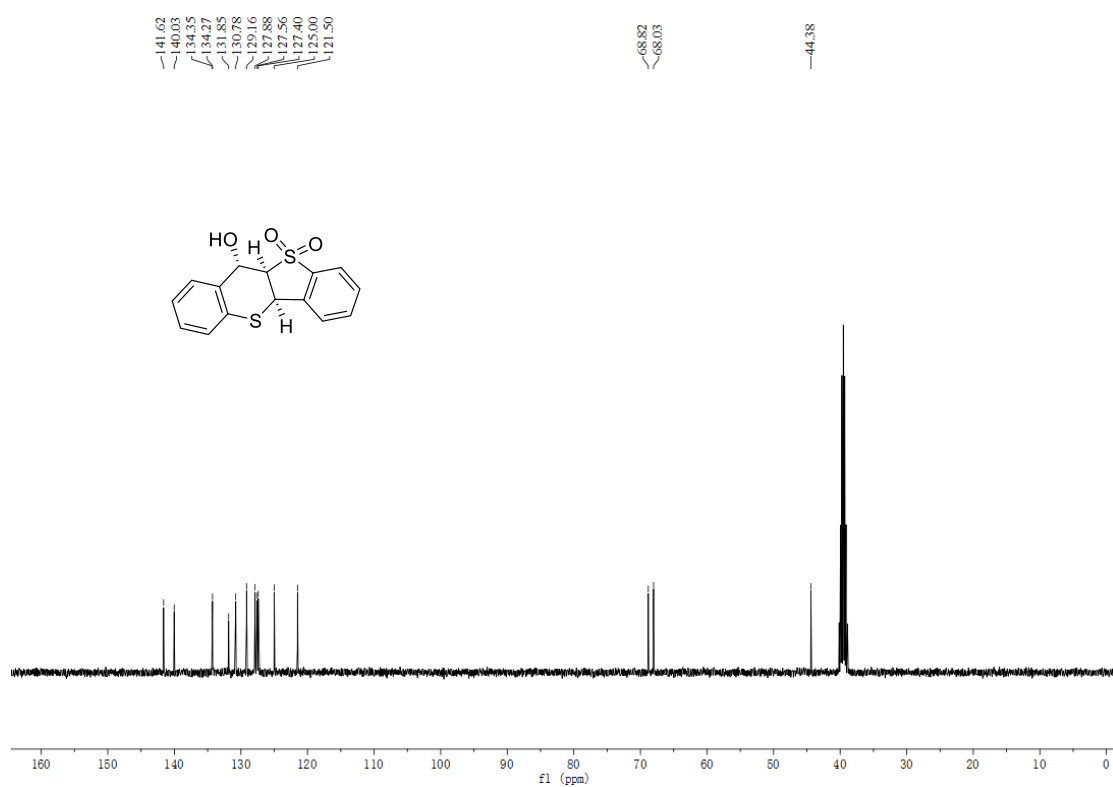

### HPLC of 5a

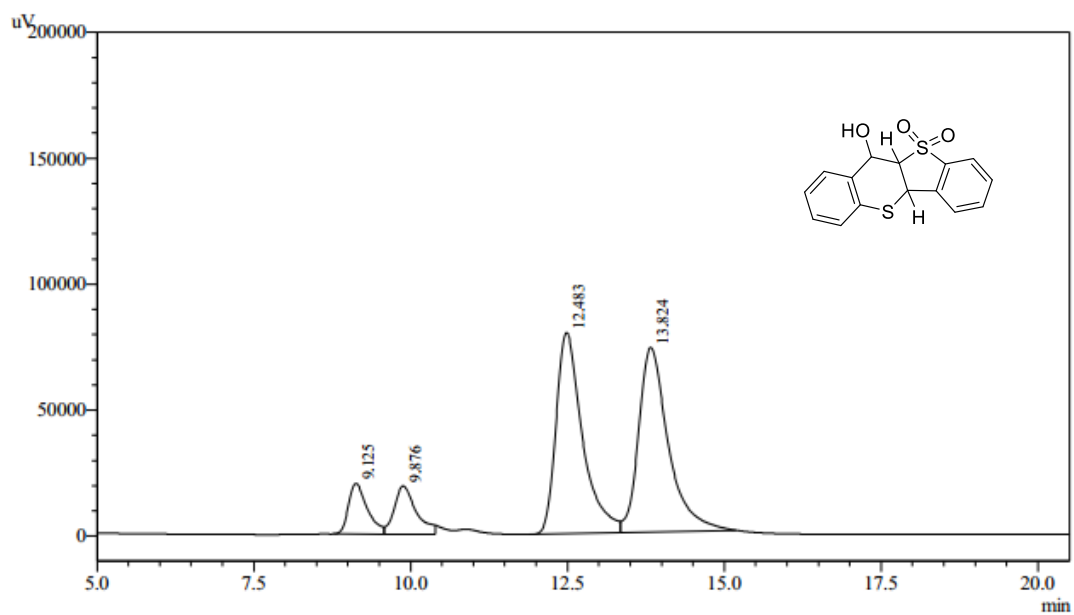

Detector A Ch1 254nm

| Peak# | Ret. Time | Area    | Height | Area %  | Height % |
|-------|-----------|---------|--------|---------|----------|
| 1     | 9.125     | 418112  | 20084  | 7.413   | 10.443   |
| 2     | 9.876     | 461327  | 19080  | 8.179   | 9.921    |
| 3     | 12.483    | 2340784 | 79861  | 41.500  | 41.524   |
| 4     | 13.824    | 2420214 | 73301  | 42.908  | 38.113   |
| Total |           | 5640437 | 192326 | 100.000 | 100.000  |

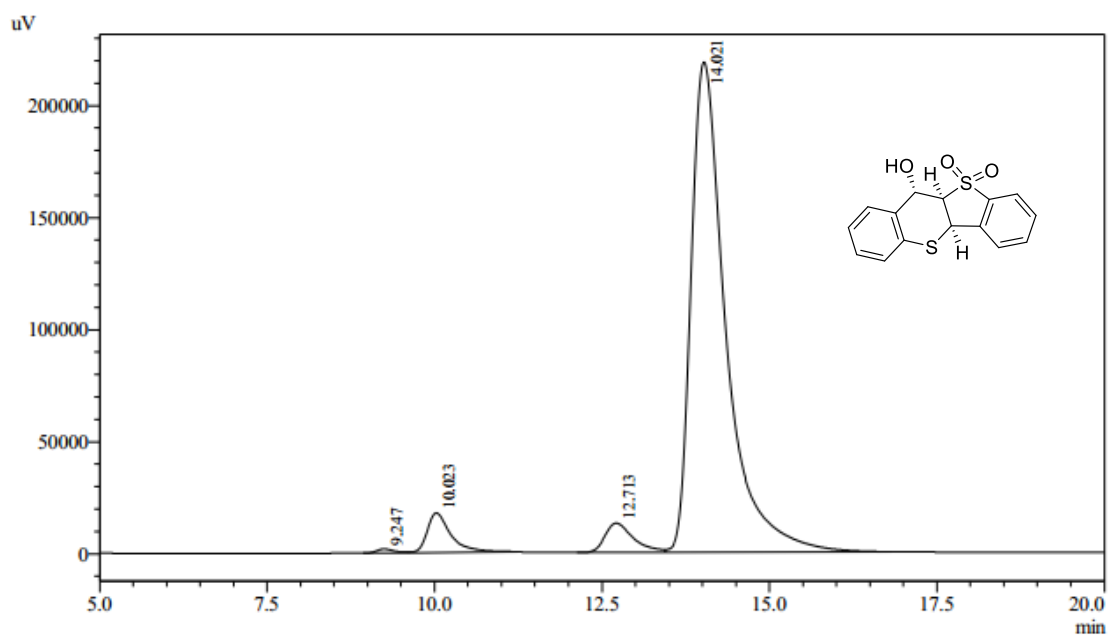

Detector A Ch1 254nm

| Peak# | Ret. Time | Area    | Height | Area %  | Height % |
|-------|-----------|---------|--------|---------|----------|
| 1     | 9.247     | 32437   | 1765   | 0.371   | 0.702    |
| 2     | 10.023    | 434721  | 17680  | 4.970   | 7.034    |
| 3     | 12.713    | 389272  | 13076  | 4.450   | 5.203    |
| 4     | 14.021    | 7890704 | 218822 | 90.209  | 87.061   |
| Total |           | 8747134 | 251343 | 100.000 | 100.000  |

<sup>1</sup>H and <sup>13</sup>C NMR of **5b**

7.8388  
7.8136  
7.6739  
7.6546  
7.6313  
7.6176  
7.6049  
7.5919  
7.5171  
7.4924  
7.4429  
7.4216  
7.4087  
7.3975  
7.3857  
7.3783  
7.3512  
7.3201  
7.2694

5.4484  
5.4348  
5.4192  
5.4051  
4.9467  
4.9172

3.8568  
3.8270  
3.7968  
3.7111  
3.6934

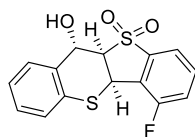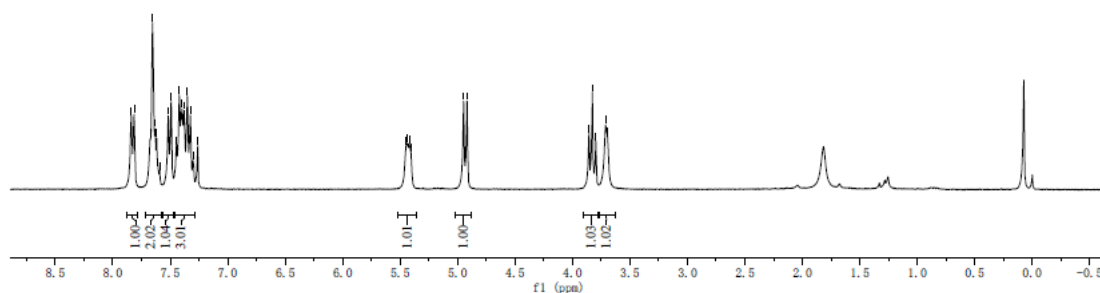

161.04  
158.48  
141.93  
139.60  
133.24  
133.17  
131.66  
129.81  
128.23  
128.04  
124.93  
122.47  
122.27  
121.31  
118.92  
118.04  
118.00

70.05  
69.51

40.94

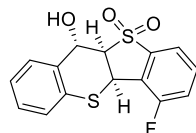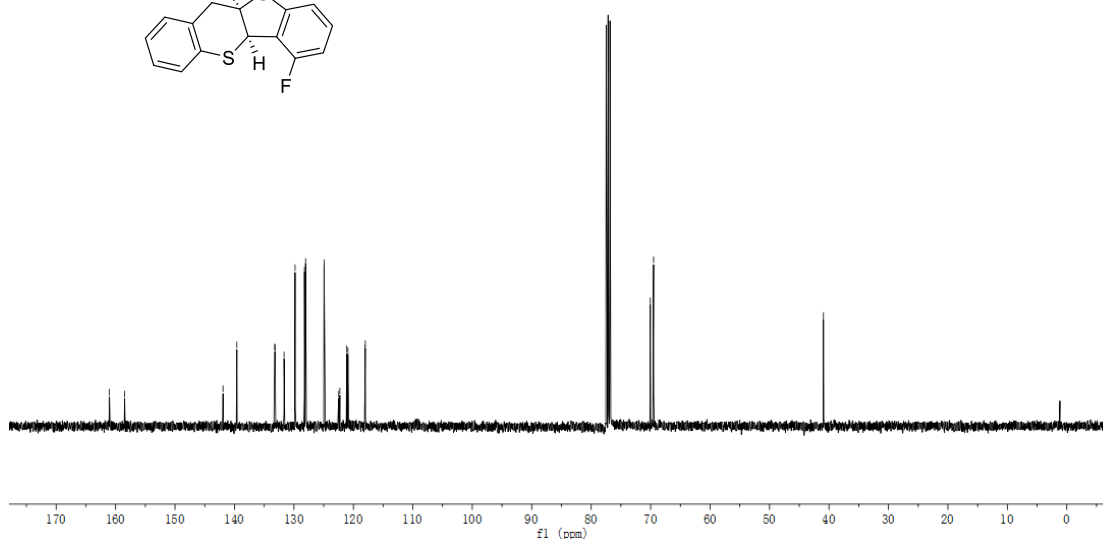

### HPLC of 5b

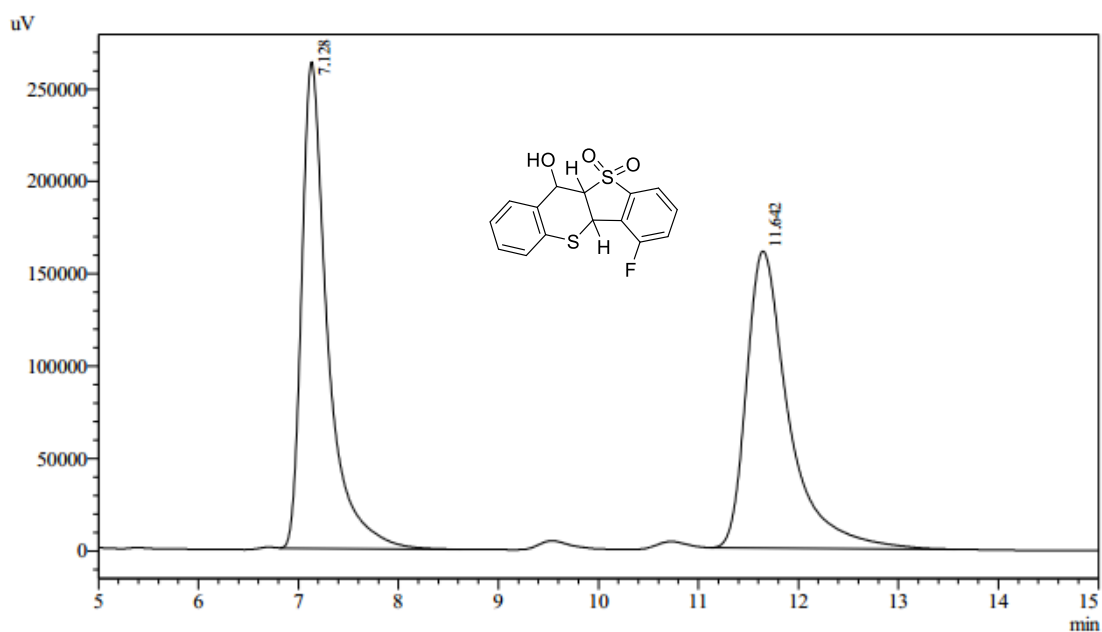

Detector A Ch1 254nm

| Peak# | Ret. Time | Area    | Height | Area %  | Height % |
|-------|-----------|---------|--------|---------|----------|
| 1     | 7.128     | 4744605 | 263345 | 50.079  | 62.089   |
| 2     | 11.642    | 4729560 | 160794 | 49.921  | 37.911   |
| Total |           | 9474165 | 424139 | 100.000 | 100.000  |

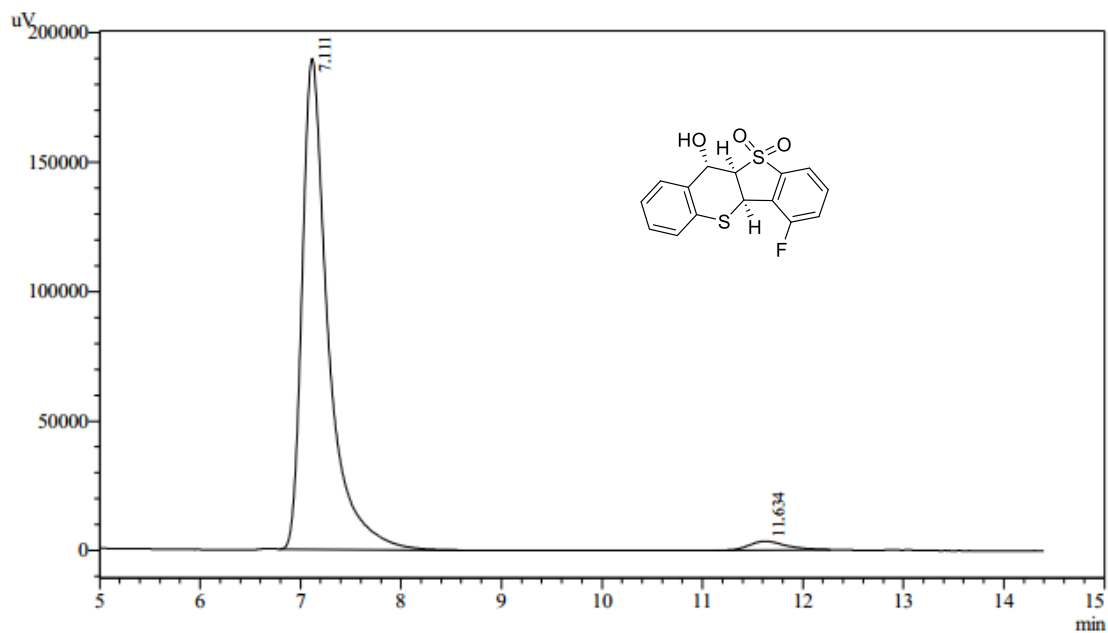

Detector A Ch1 254nm

| Peak# | Ret. Time | Area    | Height | Area %  | Height % |
|-------|-----------|---------|--------|---------|----------|
| 1     | 7.111     | 3412322 | 189371 | 97.457  | 98.223   |
| 2     | 11.634    | 89033   | 3426   | 2.543   | 1.777    |
| Total |           | 3501355 | 192797 | 100.000 | 100.000  |



<sup>1</sup>H and <sup>13</sup>C NMR of 5c

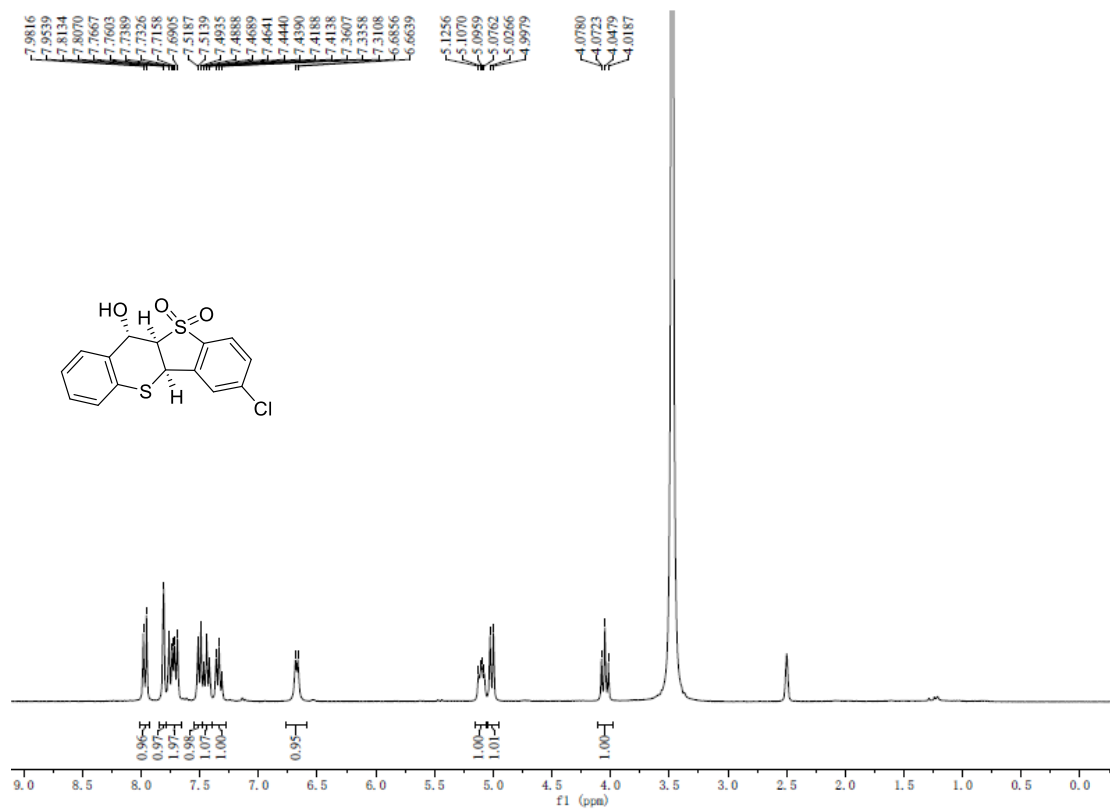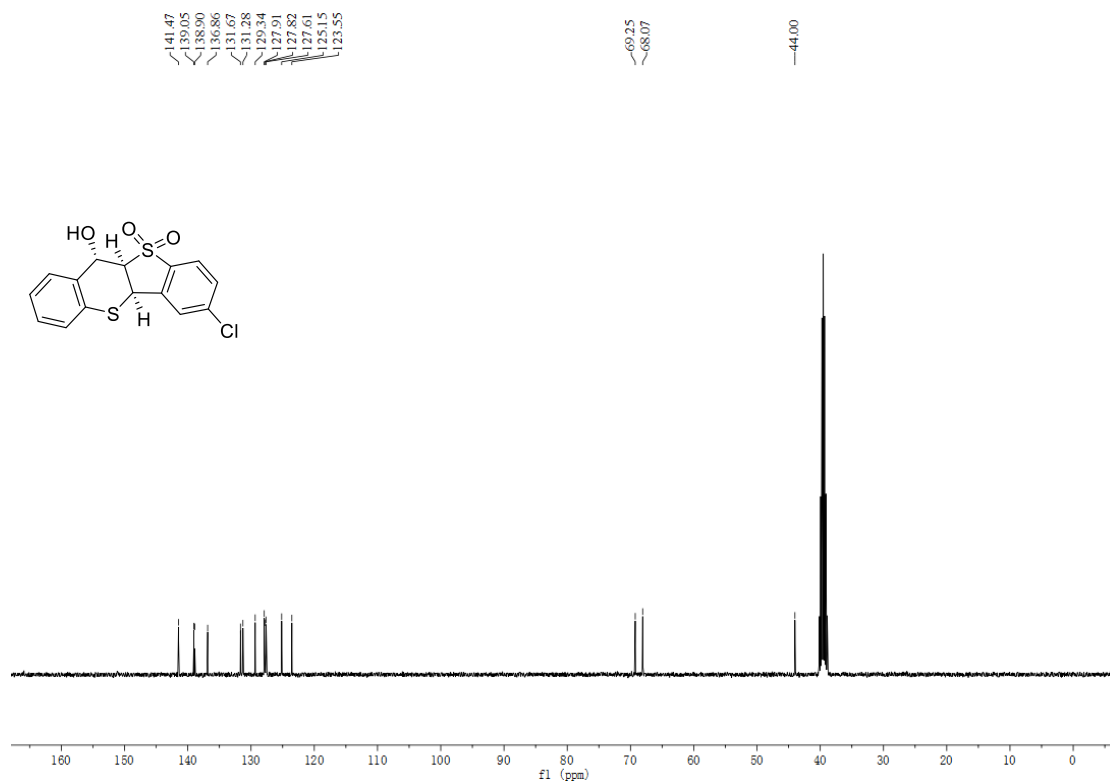

### HPLC of 5c

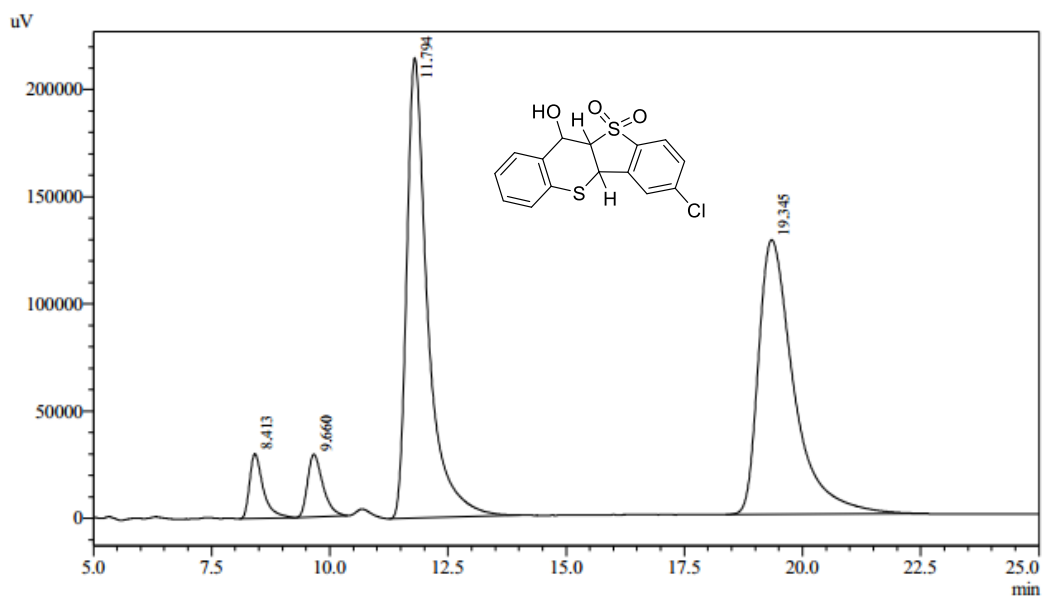

Detector A Ch1 254nm

| Peak# | Ret. Time | Area     | Height | Area %  | Height % |
|-------|-----------|----------|--------|---------|----------|
| 1     | 8.413     | 608286   | 30221  | 4.170   | 7.511    |
| 2     | 9.660     | 662341   | 29256  | 4.540   | 7.271    |
| 3     | 11.794    | 6639431  | 214829 | 45.511  | 53.391   |
| 4     | 19.345    | 6678661  | 128064 | 45.780  | 31.827   |
| Total |           | 14588719 | 402369 | 100.000 | 100.000  |

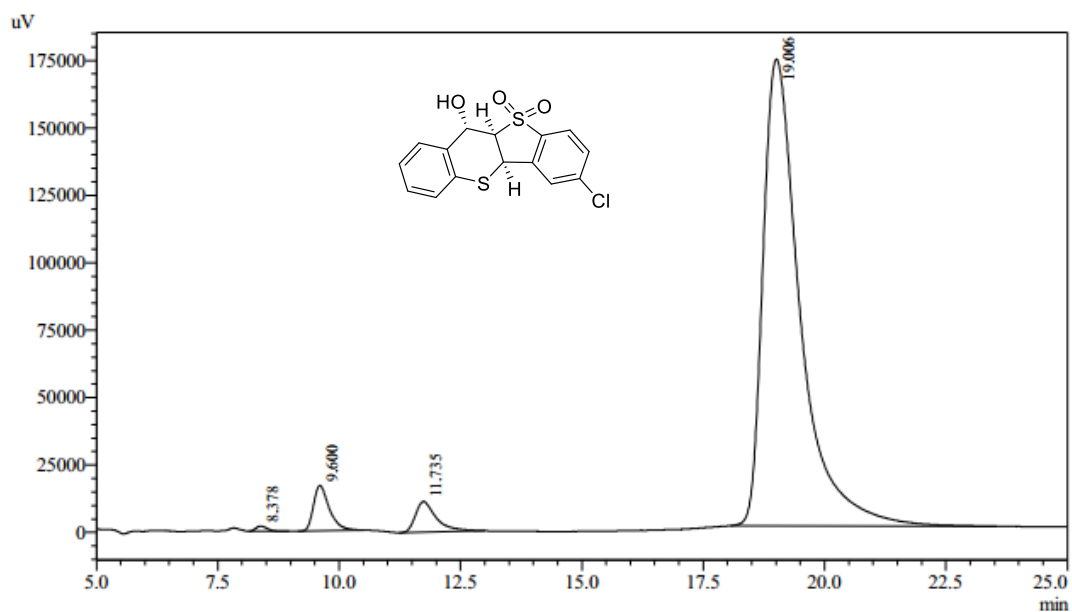

Detector A Ch1 254nm

| Peak# | Ret. Time | Area    | Height | Area %  | Height % |
|-------|-----------|---------|--------|---------|----------|
| 1     | 8.378     | 29619   | 1859   | 0.297   | 0.915    |
| 2     | 9.600     | 379501  | 16863  | 3.800   | 8.301    |
| 3     | 11.735    | 343292  | 11378  | 3.437   | 5.601    |
| 4     | 19.006    | 9234517 | 173035 | 92.466  | 85.182   |
| Total |           | 9986929 | 203134 | 100.000 | 100.000  |

$^1\text{H}$  and  $^{13}\text{C}$  NMR of **5d**

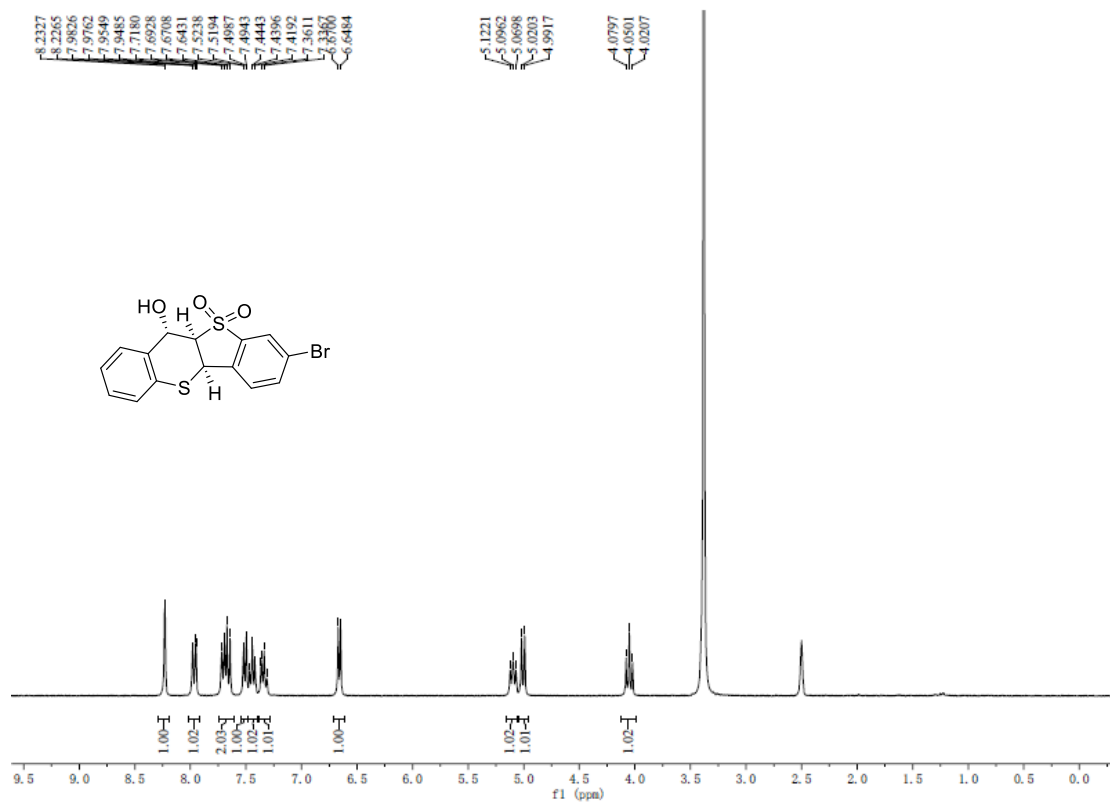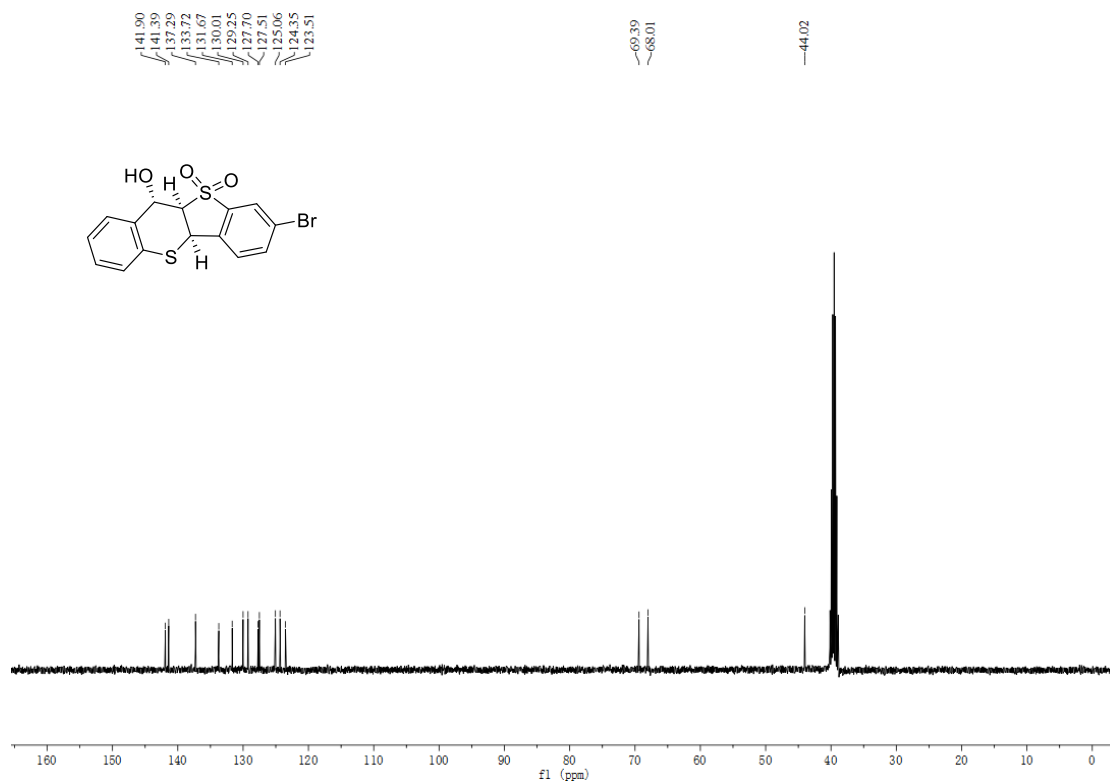

### HPLC of 5d

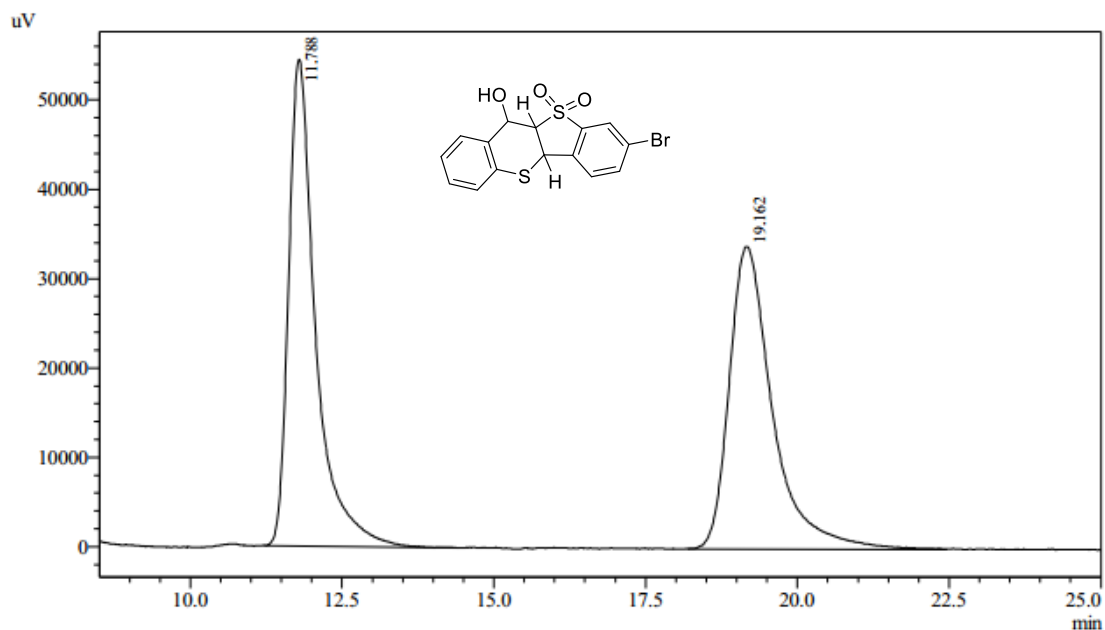

1 Det.A Ch1 / 254nm

Detector A Ch1 254nm

| Peak# | Ret. Time | Area    | Height | Area %  | Height % |
|-------|-----------|---------|--------|---------|----------|
| 1     | 11.788    | 1685254 | 54473  | 50.016  | 61.666   |
| 2     | 19.162    | 1684187 | 33863  | 49.984  | 38.334   |
| Total |           | 3369442 | 88336  | 100.000 | 100.000  |

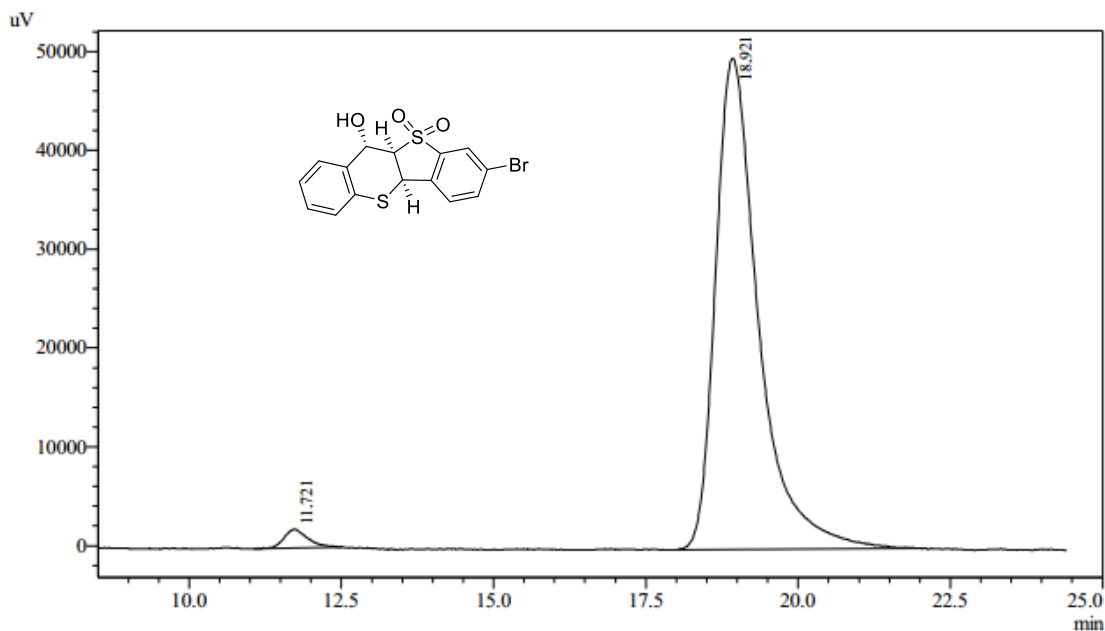

1 Det.A Ch1 / 254nm

Detector A Ch1 254nm

| Peak# | Ret. Time | Area    | Height | Area %  | Height % |
|-------|-----------|---------|--------|---------|----------|
| 1     | 11.721    | 52481   | 1909   | 2.100   | 3.701    |
| 2     | 18.921    | 2446729 | 49680  | 97.900  | 96.299   |
| Total |           | 2499210 | 51590  | 100.000 | 100.000  |

# <sup>1</sup>H and <sup>13</sup>C NMR of **5e**

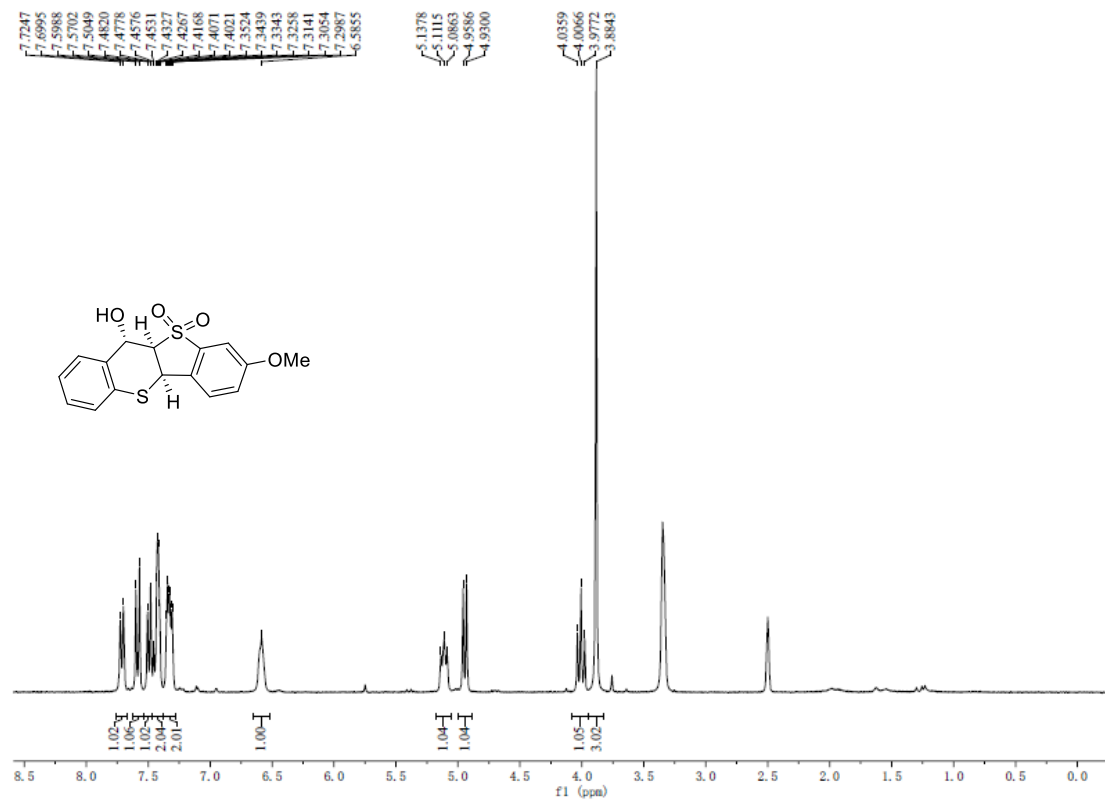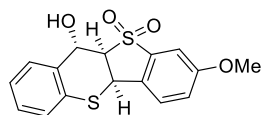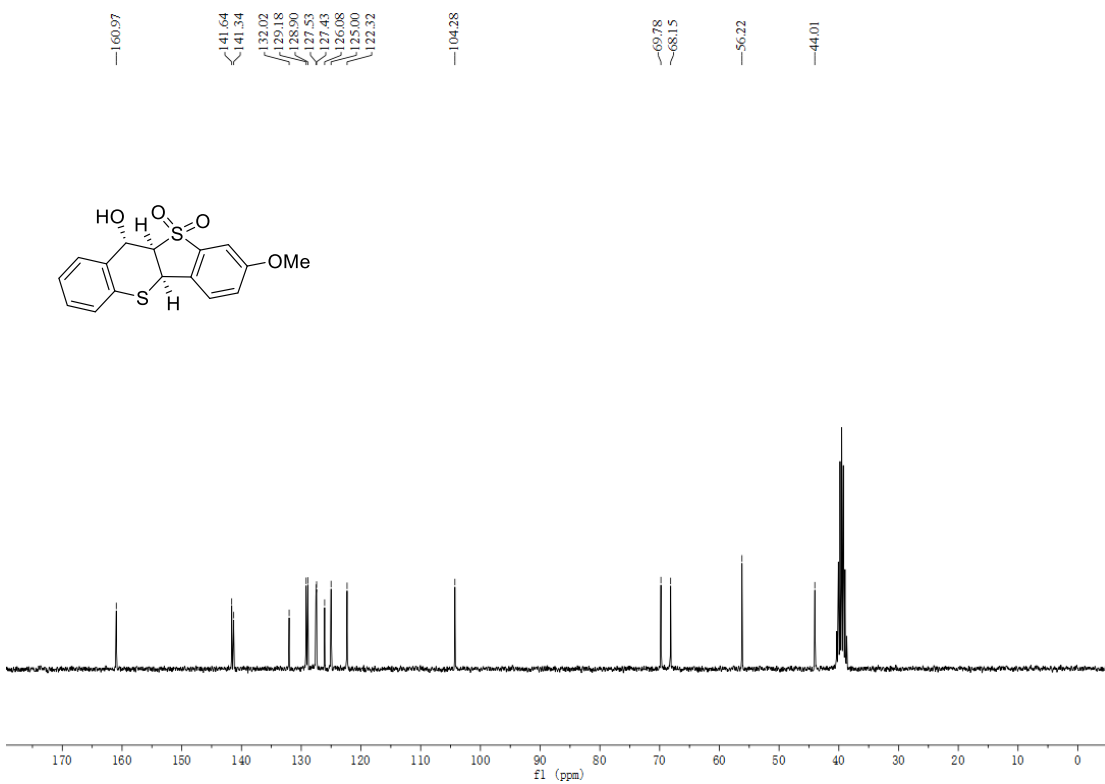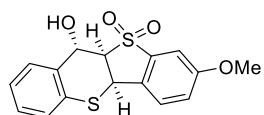

### HPLC of 5e

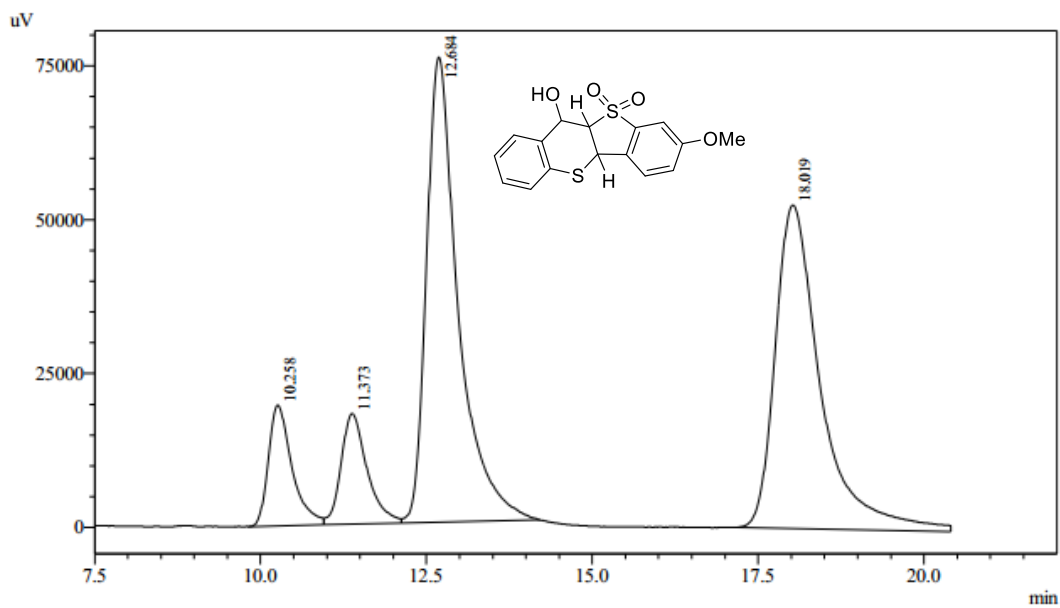

Detector A Ch1 254nm

| Peak# | Ret. Time | Area    | Height | Area %  | Height % |
|-------|-----------|---------|--------|---------|----------|
| 1     | 10.258    | 487278  | 19627  | 8.100   | 11.840   |
| 2     | 11.373    | 493168  | 17995  | 8.198   | 10.856   |
| 3     | 12.684    | 2534124 | 75569  | 42.127  | 45.589   |
| 4     | 18.019    | 2500871 | 52572  | 41.574  | 31.715   |
| Total |           | 6015441 | 165763 | 100.000 | 100.000  |

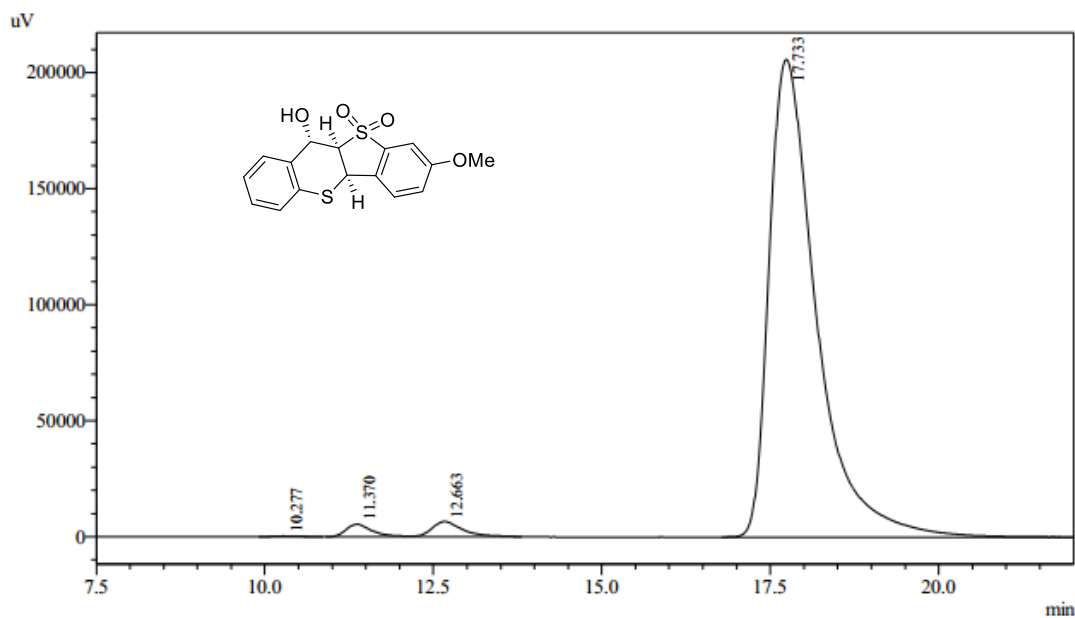

Detector A Ch1 254nm

| Peak# | Ret. Time | Area     | Height | Area %  | Height % |
|-------|-----------|----------|--------|---------|----------|
| 1     | 10.277    | 7901     | 350    | 0.076   | 0.161    |
| 2     | 11.370    | 142508   | 5325   | 1.370   | 2.442    |
| 3     | 12.663    | 201199   | 6497   | 1.934   | 2.979    |
| 4     | 17.733    | 10053881 | 205877 | 96.621  | 94.418   |
| Total |           | 10405489 | 218049 | 100.000 | 100.000  |

<sup>1</sup>H and <sup>13</sup>C NMR of **5f**

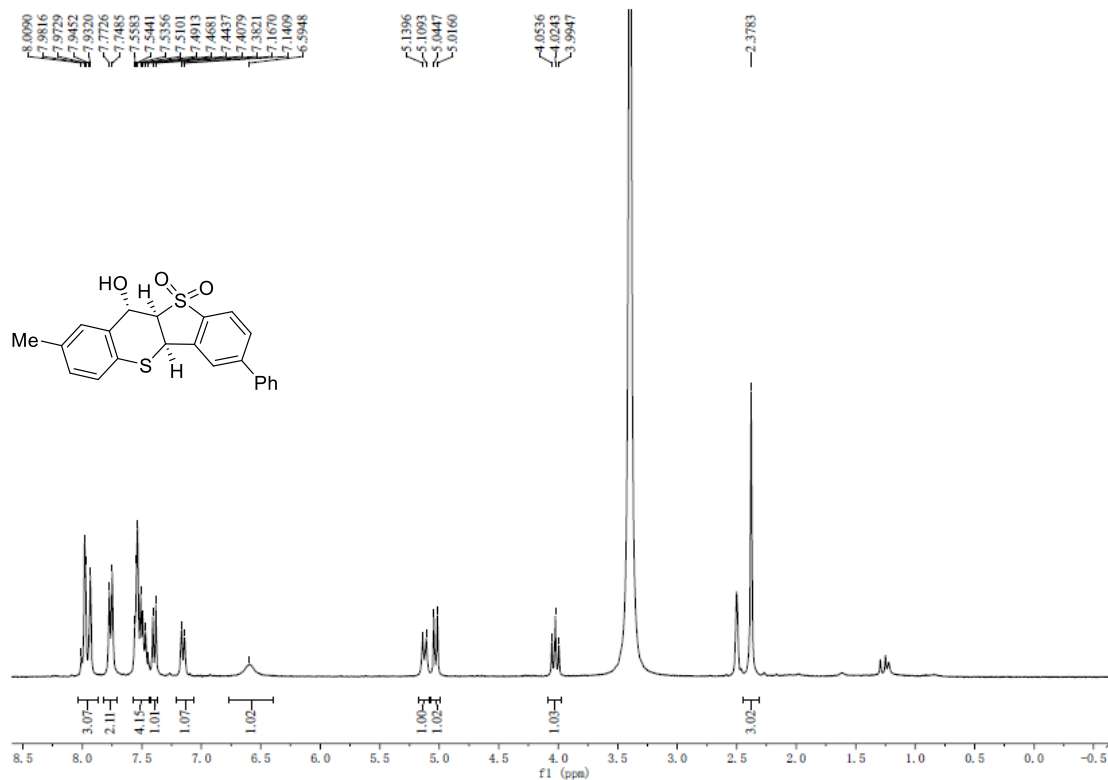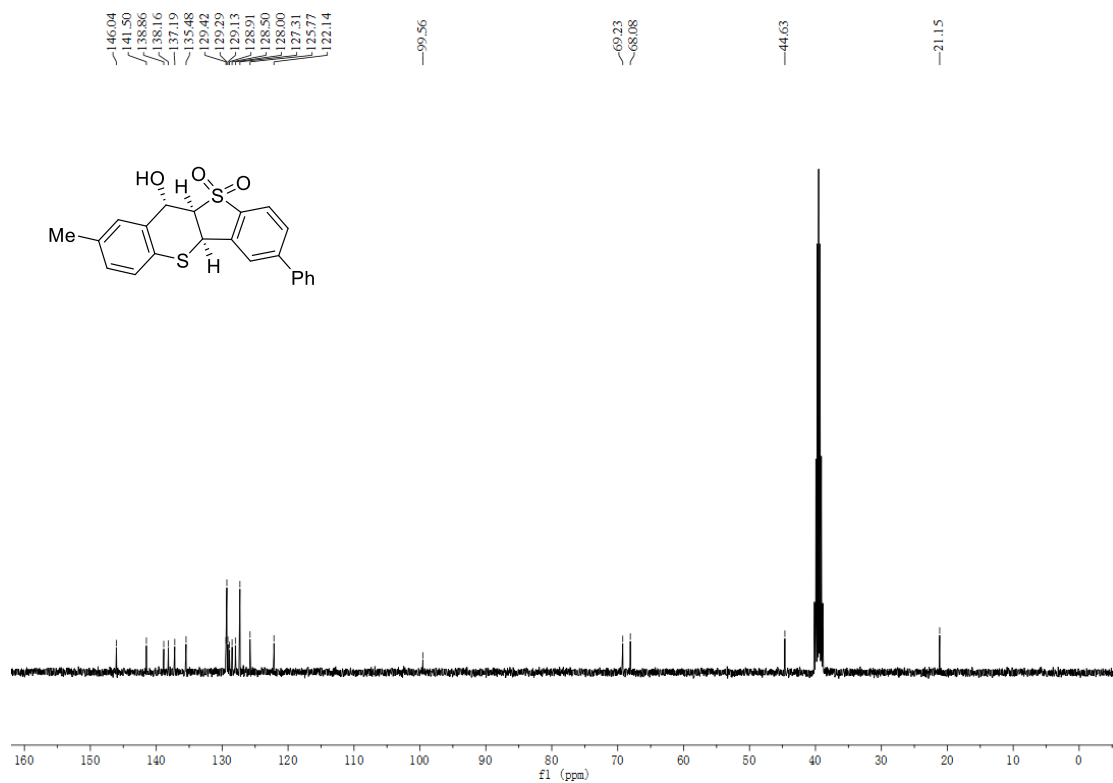

### HPLC of 5f

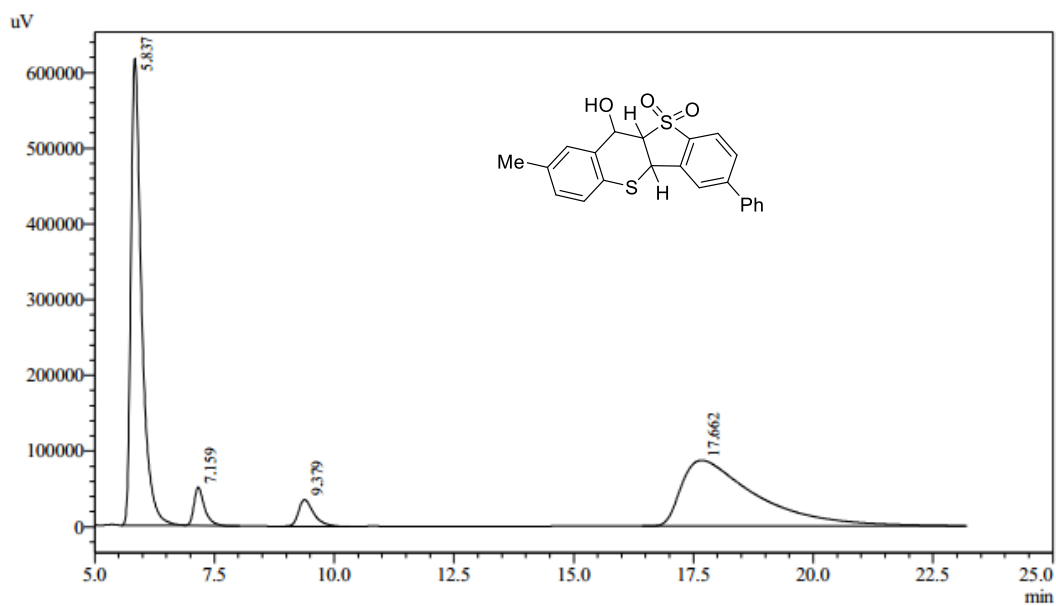

Detector A Ch1 254nm

| Peak# | Ret. Time | Area     | Height | Area %  | Height % |
|-------|-----------|----------|--------|---------|----------|
| 1     | 5.837     | 9548782  | 616826 | 46.621  | 78.133   |
| 2     | 7.159     | 769251   | 50547  | 3.756   | 6.403    |
| 3     | 9.379     | 780494   | 35230  | 3.811   | 4.463    |
| 4     | 17.662    | 9383134  | 86851  | 45.812  | 11.001   |
| Total |           | 20481660 | 789455 | 100.000 | 100.000  |

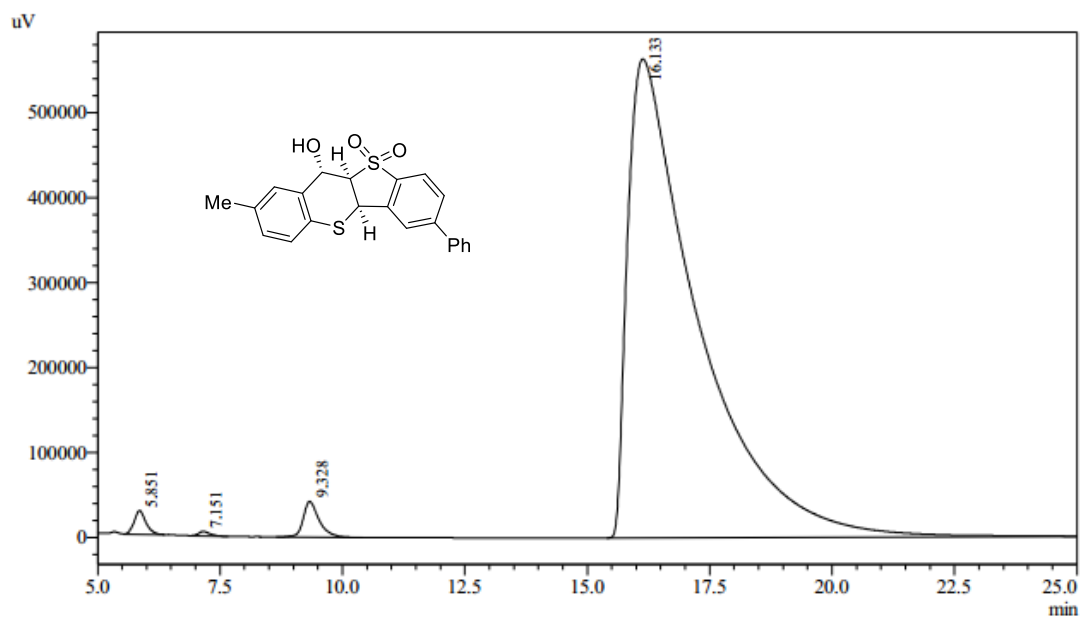

Detector A Ch1 254nm

| Peak# | Ret. Time | Area     | Height | Area %  | Height % |
|-------|-----------|----------|--------|---------|----------|
| 1     | 5.851     | 460010   | 28004  | 0.793   | 4.383    |
| 2     | 7.151     | 82945    | 5282   | 0.143   | 0.827    |
| 3     | 9.328     | 951852   | 41959  | 1.642   | 6.568    |
| 4     | 16.133    | 56479686 | 563629 | 97.422  | 88.222   |
| Total |           | 57974493 | 638874 | 100.000 | 100.000  |
